# Supplementary material for: Integrated strategy for in vitro characterization of a bileaflet mechanical aortic valve
Source: Biomed Eng Online. 2017 Feb 16;16:29. doi: 10.1186/s12938-017-0314-2 (PMC5314609; doi:10.1186/s12938-017-0314-2)
Supplement: Supplementary file 1 — Additional file 1. Pressure data. [file 12938_2017_314_MOESM1_ESM.xlsx]

## Sheet: Foglio1
Test 1					Test 2					Test 3					Test 4					Test 5
SV = 64 ml , T = 1.8 s					SV = 54 ml , T = 2.4 s					SV = 64 ml , T = 2.4 s					SV = 80 ml , T = 2.4 s					SV = 64 ml , T = 3.0 s
time (s)	pv (mmHg)	pao (mmHg)	lvdt (mm)		time (s)	pv (mmHg)	pao (mmHg)	lvdt (mm)		time (s)	pv (mmHg)	pao (mmHg)	lvdt (mm)		time (s)	pv (mmHg)	pao (mmHg)	lvdt (mm)		time (s)	pv (mmHg)	pao (mmHg)	lvdt (mm)
0	22.7499	82.3125	0.296809		0	24.124	82.2525	-0.0185158		0	24.452	82.792	0.372		0	23.5648	82.9807	-0.0169163		9.27555e-05	23.711	74.2721	0.308021
0.00138673	24.6051	88.6258	0.310332		0.002	24.1926	82.2303	-0.00661126		0.002	24.4576	82.793	0.373496		0.002	23.6688	82.9485	-0.00692256		0.00246852	27.1899	85.2621	0.352616
0.00307399	21.4299	76.6724	0.279534		0.004	24.3276	82.1853	-0.0255361		0.004	24.576	82.813	0.386925		0.004	23.7705	82.8679	-0.0145762		0.00500383	26.0626	81.132	0.339431
0.00445294	23.8216	85.1837	0.307295		0.006	24.4178	82.3258	-0.0133847		0.006	24.6606	82.8296	0.391101		0.006	23.9282	82.8829	-0.00948809		0.0074855	26.8442	83.5451	0.343874
0.006	23.151	82.4591	0.282908		0.008	24.4841	82.0637	-0.00415306		0.008	24.6988	82.773	0.370233		0.008	23.9514	82.9068	-0.0207807		0.00998664	26.4237	82.1958	0.332281
0.0075065	22.8394	81.015	0.289321		0.01	24.5721	82.2742	-0.00846832		0.01	24.805	82.9796	0.358436		0.01	24.0787	83.0024	-0.0142542		0.0124824	26.9445	83.007	0.350679
0.00896357	23.5702	83.8723	0.290297		0.012	24.795	82.1325	-0.0214677		0.012	24.972	82.8102	0.391884		0.012	24.2662	82.9851	-0.0153598		0.0149959	26.8581	82.4205	0.342812
0.0105029	23.0806	81.8018	0.271235		0.014	24.8929	82.2303	-0.00412086		0.014	25.0716	82.8418	0.380678		0.014	24.4189	82.8691	-0.00587056		0.0174858	27.1346	82.692	0.348194
0.012	23.5532	82.498	0.297077		0.016	24.9781	82.2825	-0.00953103		0.016	25.2154	82.8024	0.388825		0.016	24.5107	82.9413	-0.0327174		0.0199801	27.1749	82.5307	0.337833
0.0134777	23.7347	82.7219	0.302499		0.018	25.076	82.2869	-0.00812482		0.018	25.3438	82.8452	0.364801		0.018	24.597	82.8513	-0.000728758		0.0224797	27.2832	82.5413	0.341819
0.0149861	23.6307	82.1566	0.289366		0.02	25.1264	82.1786	-0.0148661		0.02	25.3825	82.7868	0.403037		0.02	24.748	82.9518	-0.0195463		0.0249936	27.3621	82.6049	0.325548
0.0164889	23.8724	82.638	0.289258		0.022	25.4124	82.3669	-0.00808188		0.022	25.5058	83.0068	0.384703		0.022	24.8918	82.9057	-0.0185265		0.0274827	27.5539	82.5187	0.337025
0.018	23.8768	82.5302	0.280085		0.024	25.4771	82.2986	-0.0150056		0.024	25.6513	82.8307	0.38933		0.024	24.998	82.9352	-0.0130519		0.0299731	27.592	82.5351	0.340987
0.0194802	23.9179	82.4304	0.274262		0.026	25.5258	82.2014	-0.00860786		0.026	25.6983	82.8363	0.386474		0.026	25.1247	82.9518	-0.0101644		0.0324738	27.7171	82.5352	0.344161
0.0209783	24.1072	82.3794	0.282471		0.028	25.7343	82.2814	-0.00935928		0.028	25.8455	82.9074	0.384843		0.028	25.2337	82.8535	-0.00544121		0.0349911	27.9617	82.5927	0.336808
0.0224881	24.3042	82.4239	0.290714		0.03	25.7022	82.2347	-0.0187305		0.03	25.9617	82.7835	0.388514		0.03	25.3581	82.9729	-0.00142652		0.0374754	28.0724	82.5899	0.330496
0.024	24.3879	82.5813	0.283885		0.032	25.7813	82.2636	-0.0128909		0.032	26.0474	82.8413	0.366658		0.032	25.617	82.6908	-0.0273395		0.0399642	28.2436	82.7799	0.33685
0.0254756	24.4444	82.5185	0.272295		0.034	26.0634	82.2492	-0.0264056		0.034	26.1918	82.8118	0.371843		0.034	25.6718	82.9663	0.00778366		0.0424666	28.3336	82.6178	0.334668
0.0269721	24.6637	82.4059	0.279926		0.036	26.1182	82.3742	-0.0101751		0.036	26.3638	83.0062	0.37867		0.036	25.8853	82.9113	0.0121633		0.0449885	28.5104	82.6274	0.324002
0.0284836	24.8238	82.5276	0.295612		0.038	26.2609	82.2558	-0.0100678		0.038	26.3234	82.9418	0.38481		0.038	25.9307	82.8791	0.00124637		0.0474682	28.5711	82.6355	0.347179
0.03	24.8708	82.6519	0.299772		0.04	26.4014	82.2236	-0.0264915		0.04	26.6067	82.8141	0.384757		0.04	26.1132	82.8885	-0.00915532		0.0499552	28.6934	82.5408	0.335103
0.0314711	24.898	82.4012	0.297966		0.042	26.4955	82.3092	-0.00850052		0.042	26.6006	82.9335	0.379497		0.042	26.3063	82.9218	-0.0161435		0.0524593	28.8178	82.5711	0.350494
0.0329659	24.9044	82.3788	0.294814		0.044	26.4866	82.403	-0.0107547		0.044	26.8777	82.9068	0.363588		0.044	26.4169	82.7335	-0.014748		0.054986	28.9769	82.6104	0.348642
0.0344791	25.0186	82.5607	0.287742		0.046	26.7366	82.3175	0.00161136		0.046	26.9341	82.9718	0.38642		0.046	26.5403	82.9168	-0.00431408		0.0574609	29.0189	82.5624	0.355404
0.036	25.2121	82.6013	0.286225		0.048	26.9103	82.2897	-0.00646098		0.048	27.0591	82.8613	0.38977		0.048	26.7012	83.0262	-0.0113344		0.0599463	29.3075	82.6238	0.345449
0.0374666	25.3154	82.5286	0.290663		0.05	27.052	82.2575	-0.0124723		0.05	27.1427	82.7307	0.38393		0.05	26.8611	82.7674	-0.013857		0.0624521	29.3161	82.5531	0.35241
0.0389597	25.5768	82.5429	0.292372		0.052	27.0713	82.3147	-0.0117209		0.052	27.3374	82.8868	0.375826		0.052	27.0785	83.1034	-0.0175926		0.0649835	29.5253	82.5947	0.35131
0.0404745	25.7713	82.5038	0.299081		0.054	27.3601	82.3525	0.0136876		0.054	27.6389	82.9757	0.385809		0.054	27.2605	82.6913	-0.0311717		0.0674537	29.7131	82.5942	0.334485
0.042	25.7354	82.5008	0.304055		0.056	27.5177	82.358	-0.00647171		0.056	27.6665	82.6552	0.382449		0.056	27.3186	82.8713	-0.0198146		0.0699373	29.7285	82.5026	0.3405
0.043462	25.8552	82.4523	0.293206		0.058	27.5592	82.3214	0.00165427		0.058	27.7595	82.934	0.382331		0.058	27.5836	82.9074	-0.0214677		0.0724448	29.8705	82.6618	0.328949
0.0449535	26.0855	82.4918	0.284399		0.06	27.7584	82.4436	-0.00731973		0.06	27.9238	82.9685	0.385691		0.06	27.6129	82.9102	-0.00882255		0.0749809	30.1001	82.605	0.334652
0.04647	26.056	82.5912	0.284841		0.062	27.8872	82.3014	-0.00446437		0.062	28.0969	82.8174	0.383876		0.062	27.9774	82.8479	-0.0251174		0.0774464	30.1833	82.5934	0.336996
0.048	26.0717	82.7663	0.290905		0.064	28.0034	82.4214	-0.0145548		0.064	28.1832	82.954	0.382245		0.064	28.0123	82.8379	-0.0263519		0.0799284	30.3893	82.6229	0.366367
0.0494575	26.3208	82.738	0.29416		0.066	28.0952	82.3653	0.00332885		0.066	28.3021	82.9868	0.379583		0.066	28.145	82.8374	-0.0124615		0.0824376	30.562	82.6447	0.346245
0.0509472	26.5633	82.5594	0.28128		0.068	28.3099	82.202	0.00289948		0.068	28.3397	83.0046	0.38597		0.068	28.3121	82.8452	-0.0143079		0.0849784	30.6742	82.6731	0.340485
0.0524655	26.7141	82.4943	0.280513		0.07	28.4565	82.2803	-0.0112593		0.07	28.54	82.9735	0.38451		0.07	28.4941	82.8724	-0.00315476		0.0874392	30.9207	82.6443	0.355857
0.054	26.8351	82.6163	0.297077		0.072	28.5262	82.3753	-0.00891916		0.072	28.7496	82.9551	0.378863		0.072	28.6877	82.8146	0.00381192		0.0899194	30.9919	82.5404	0.329813
0.055453	26.9175	82.5816	0.287482		0.074	28.7159	82.4575	-0.00886549		0.074	28.9012	82.9401	0.385894		0.074	28.9018	82.8646	-0.0160039		0.0924303	31.1319	82.6212	0.343013
0.056941	27.1786	82.6283	0.270879		0.076	28.9963	82.2925	-0.0229491		0.076	29.0871	83.0712	0.355956		0.076	29.097	82.904	-0.0121395		0.0949758	31.3055	82.6426	0.335471
0.0584609	27.402	82.7309	0.281958		0.078	28.9632	82.3891	-0.00592425		0.078	29.1866	82.8829	0.378778		0.078	29.2702	82.7602	-0.0179683		0.0974319	31.4985	82.7504	0.359766
0.06	27.4519	82.7052	0.293975		0.08	29.3045	82.3097	-0.00883328		0.08	29.3515	82.9002	0.381558		0.08	29.5075	82.8296	-0.0287672		0.0999105	31.6586	82.5642	0.34277
0.0614484	27.5186	82.5211	0.283328		0.082	29.3144	82.3864	-0.00266095		0.082	29.5551	82.8968	0.385766		0.082	29.4931	82.8496	-0.00925194		0.102423	31.7368	82.6055	0.351172
0.0629348	27.6523	82.5028	0.277929		0.084	29.627	82.4447	-0.00447509		0.084	29.6059	83.0735	0.384048		0.084	29.7774	82.7385	-0.0221225		0.104973	31.9356	82.752	0.339344
0.0644564	27.8741	82.5874	0.296004		0.086	29.7675	82.388	-0.002822		0.086	29.6319	82.8013	0.375439		0.086	29.976	82.8552	-0.0129016		0.107425	32.0776	82.5689	0.34278
0.066	28.0366	82.7346	0.292934		0.088	29.8023	82.3625	0.00370455		0.088	29.8798	82.8213	0.373818		0.088	30.1436	82.7924	-0.0301626		0.109902	32.3	82.6551	0.324009
0.0674439	28.0105	82.6593	0.269391		0.09	30.0114	82.262	-0.00443216		0.09	30.1138	83.0424	0.378209		0.09	30.4163	82.8368	-0.0135564		0.112416	32.3377	82.6435	0.345336
0.0689286	28.2488	82.5035	0.281042		0.092	30.142	82.3275	-0.0170022		0.092	30.3013	82.9907	0.372938		0.092	30.6796	82.8768	-0.0285095		0.114971	32.583	82.6073	0.34032
0.0704519	28.534	82.6472	0.289895		0.094	30.2919	82.2742	0.00980173		0.094	30.4257	83.1234	0.375933		0.094	30.8827	82.7191	-0.00971351		0.117417	32.6264	82.5809	0.346902
0.072	28.6246	82.8541	0.273		0.096	30.4147	82.3503	-0.00939148		0.096	30.6282	82.9663	0.392271		0.096	30.985	82.788	-0.0145011		0.119893	32.8006	82.6024	0.342831
0.0734394	28.8055	82.6592	0.286462		0.098	30.6177	82.5025	-0.0111519		0.098	30.7117	83.0274	0.383297		0.098	31.2184	82.763	-0.0143293		0.122409	33.1701	82.5796	0.3425
0.0749224	29.0045	82.6774	0.306721		0.1	30.819	82.2247	-0.014222		0.1	30.949	83.0551	0.365789		0.1	31.412	82.8196	-0.0159395		0.124968	33.3066	82.7017	0.340468
0.0764474	29.1239	82.7424	0.293924		0.102	30.9363	82.3736	0.00136445		0.102	31.0945	83.0268	0.384005		0.102	31.3435	82.7219	-0.0201689		0.12741	33.3773	82.6808	0.342895
0.078	29.357	82.7185	0.286182		0.104	31.1272	82.3192	-0.00470052		0.104	31.2096	82.9557	0.386442		0.104	31.7428	82.7352	-0.00996041		0.129884	33.5809	82.6285	0.331793
0.0794348	29.5241	82.8182	0.296156		0.106	31.4303	82.4719	-0.00449656		0.106	31.271	82.9596	0.359799		0.106	32.072	82.6963	0.00176162		0.132401	33.8001	82.5621	0.348549
0.0809162	29.6645	82.7653	0.300368		0.108	31.5238	82.2253	-0.00298301		0.108	31.6848	82.9768	0.373807		0.108	32.2263	82.7219	-0.0107762		0.134966	34.0308	82.7234	0.338272
0.0824428	29.9101	82.5461	0.300773		0.11	31.625	82.4641	-0.0170666		0.11	31.7782	83.0512	0.367345		0.11	32.5339	82.7885	-0.0192564		0.137403	34.0405	82.6975	0.337238
0.084	30.2565	82.7852	0.299579		0.112	31.8136	82.4308	-0.00906945		0.112	31.9542	83.0429	0.382288		0.112	32.7922	82.6919	-0.0134491		0.139875	34.3296	82.6722	0.350573
0.0854303	30.5218	82.8701	0.290458		0.114	31.9016	82.5419	-0.0285954		0.114	32.2125	83.1023	0.370083		0.114	33.0268	82.698	-0.00467905		0.142394	34.63	82.6577	0.330985
0.08691	30.6959	82.55	0.287063		0.116	32.1262	82.3225	-0.0110017		0.116	32.395	82.9729	0.391455		0.116	33.3459	82.8235	-0.017496		0.144963	34.7801	82.5976	0.357125
0.0884383	30.9493	82.5188	0.291849		0.118	32.405	82.3997	-0.0135779		0.118	32.4802	82.9651	0.373142		0.118	33.534	82.7008	-0.00772764		0.147396	34.9264	82.6473	0.343357
0.09	31.2721	82.8002	0.296648		0.12	32.5068	82.4775	0.00185823		0.12	32.6738	83.0196	0.37984		0.12	33.8919	82.8241	-0.0155101		0.149866	35.043	82.6717	0.356445
0.0914258	31.5345	82.6876	0.293059		0.122	32.7712	82.4702	-0.0118389		0.122	32.9537	82.9485	0.370458		0.122	34.1453	82.7713	-0.00642877		0.152387	35.2069	82.6756	0.334018
0.0929038	31.9209	82.6367	0.276553		0.124	33.0168	82.3614	0.00805202		0.124	33.1518	83.0407	0.385465		0.124	34.5048	82.7846	-0.00241408		0.154961	35.5304	82.6753	0.342375
0.0944338	32.2658	82.7568	0.278904		0.126	33.102	82.3886	-0.00613894		0.126	33.2585	83.0785	0.365585		0.126	34.9131	82.6091	-0.0196751		0.157388	35.6622	82.6459	0.337015
0.096	32.7291	82.8346	0.299042		0.128	33.3221	82.2481	-0.00987453		0.128	33.336	83.0546	0.396114		0.128	35.3451	82.7524	-0.0162615		0.159857	35.913	82.6286	0.360696
0.0974213	33.4389	82.838	0.294859		0.13	33.4367	82.4336	-0.00122256		0.13	33.8504	83.144	0.379722		0.13	36.0034	82.8335	-0.00866154		0.16238	36.0579	82.5017	0.351467
0.0988976	34.0522	82.776	0.279735		0.132	33.7414	82.4025	-0.014909		0.132	34.0916	82.8302	0.365832		0.132	36.4581	82.7463	-0.0196644		0.164958	36.2669	82.9165	0.358138
0.100429	34.7601	82.6859	0.277105		0.134	33.7697	82.2214	-0.019235		0.134	34.3411	83.1173	0.408233		0.134	36.8276	82.7124	-0.0177643		0.167381	36.5035	82.783	0.344791
0.102	35.7533	82.798	0.289155		0.136	34.1995	82.4286	0.0044667		0.136	34.5198	83.0112	0.354088		0.136	37.8084	82.6696	-0.00215646		0.169848	36.6442	82.6567	0.332906
0.103417	36.6126	82.8074	0.304249		0.138	34.4174	82.3991	-0.00556999		0.138	34.9806	83.0224	0.39036		0.138	38.8516	82.7113	-0.0109372		0.172372	36.9029	82.6428	0.340624
0.104891	37.5884	82.8036	0.298328		0.14	34.5961	82.3614	-0.0304095		0.14	35.3257	83.0268	0.367474		0.14	40.0139	82.5686	0.00617348		0.174955	37.3403	82.8138	0.337017
0.106425	38.5665	82.7791	0.292338		0.142	34.8196	82.428	-0.00771691		0.142	35.4928	82.8518	0.383426		0.142	41.4919	82.6541	-0.00716945		0.177374	37.398	82.7857	0.351106
0.108	39.3467	82.8352	0.301983		0.144	35.219	82.4614	-0.0124293		0.144	36.0189	82.9946	0.395878		0.144	42.5855	82.6585	-0.01127		0.179839	37.5882	82.5041	0.343823
0.109412	40.2045	82.855	0.293937		0.146	35.4065	82.4025	-0.000718029		0.146	36.5576	82.9935	0.386098		0.146	43.9607	82.5969	-0.00304742		0.182365	37.9326	82.6969	0.344985
0.110885	41.1197	82.7993	0.276569		0.148	35.5769	82.478	0.0325481		0.148	37.2663	82.9935	0.394267		0.148	45.1495	82.6241	-0.00561294		0.184953	38.2493	82.6072	0.341008
0.11242	41.9377	82.8184	0.283621		0.15	35.9458	82.3986	0.00462772		0.15	38.0097	83.0462	0.387322		0.15	46.0584	82.7196	-0.025257		0.187367	38.6437	82.7335	0.332807
0.114	42.8948	82.8629	0.305794		0.152	36.1522	82.6285	0.000366154		0.152	38.7554	83.064	0.400375		0.152	47.2377	82.5508	-0.0029186		0.18983	38.8913	82.6557	0.374434
0.115408	43.9948	82.668	0.311092		0.154	36.5416	82.3858	-0.0129983		0.154	39.8844	83.0868	0.377275		0.154	48.4221	82.5891	-0.00946659		0.192358	39.2693	82.5964	0.359057
0.116879	45.2994	82.7514	0.293943		0.156	36.8243	82.3842	-0.0117423		0.156	40.6544	83.0424	0.383876		0.156	50.0744	82.6891	0.00822376		0.19495	39.8517	82.6945	0.356247
0.118416	46.7092	82.8625	0.282084		0.158	37.1047	82.5319	-0.0169485		0.158	41.3769	82.9829	0.389523		0.158	51.7035	82.6769	0.00326444		0.197359	40.2205	82.7028	0.36716
0.12	48.2722	82.8557	0.292419		0.16	37.6745	82.3991	-0.00944515		0.16	42.169	82.9962	0.39708		0.16	53.4377	82.663	0.0101238		0.199821	40.9111	82.5981	0.339951
0.121403	49.9338	82.9001	0.302182		0.162	38.1729	82.3336	-0.00751295		0.162	43.0065	83.0968	0.392883		0.162	55.2112	82.6863	0.0244543		0.202351	41.5561	82.6189	0.348881
0.122873	51.5776	82.835	0.296175		0.164	38.9861	82.3669	-0.0185158		0.164	43.9558	83.0946	0.381332		0.164	57.0864	82.6813	0.0148147		0.204948	42.4941	82.6997	0.362724
0.124411	53.2297	82.715	0.29667		0.166	39.8335	82.418	-0.00516211		0.166	44.9609	83.0429	0.385508		0.166	58.8317	82.6619	0.0141385		0.207352	43.1923	82.6327	0.336014
0.126	55.022	82.8663	0.308306		0.168	40.9078	82.4347	0.00140738		0.168	46.0484	83.0618	0.381568		0.168	60.6162	82.5774	0.0289949		0.209812	44.0746	82.6113	0.352924
0.127399	56.6576	82.8478	0.31545		0.17	41.7359	82.3736	-0.00514064		0.17	47.2394	83.0801	0.384531		0.17	62.1601	82.728	-0.00738412		0.212343	44.9018	82.8029	0.334199
0.128867	58.1845	82.8257	0.318057		0.172	42.798	82.3908	-0.0217683		0.172	48.6373	83.1118	0.368494		0.172	63.6686	82.7946	0.0212769		0.214945	45.6674	82.7092	0.342964
0.130407	59.746	82.9179	0.309826		0.174	43.8927	82.4214	-0.0130519		0.174	50.0982	82.9585	0.40892		0.174	65.2319	82.8418	0.0273418		0.217345	46.5256	82.6528	0.335704
0.132	61.223	83.0057	0.311462		0.176	44.6821	82.3941	0.024143		0.176	51.7129	83.0362	0.394267		0.176	66.716	82.8124	0.0434972		0.219803	47.5382	82.7483	0.338381
0.133394	62.4658	82.9734	0.329528		0.178	45.6429	82.3842	-0.0165621		0.178	53.2872	82.9935	0.386957		0.178	68.2024	82.8385	0.0399226		0.222336	48.6593	82.5922	0.347476
0.13486	63.8474	83.0082	0.321667		0.18	46.5153	82.453	-0.00683668		0.18	54.9052	83.1207	0.398336		0.18	69.6705	82.7757	0.0494441		0.224943	49.8519	82.6822	0.350612
0.136402	65.297	83.0863	0.3116		0.182	47.537	82.538	-0.00629996		0.182	56.416	82.8607	0.361452		0.182	71.4833	82.7807	0.0306588		0.227338	51.1364	82.6975	0.341957
0.138	66.6408	83.1434	0.331825		0.184	48.6245	82.5908	-0.00437849		0.184	58.0865	83.1584	0.393902		0.184	73.3021	82.8879	0.0387311		0.229794	52.6389	82.6622	0.360412
0.13939	67.9458	82.9885	0.336841		0.186	49.8487	82.2992	0.0109611		0.186	59.0491	83.0718	0.393645		0.186	75.0966	82.7257	0.0375932		0.232329	54.2308	82.6644	0.353549
0.140854	69.4623	82.9093	0.328757		0.188	51.3295	82.3692	0.00646331		0.188	60.4624	83.1284	0.404648		0.188	76.9957	82.9829	0.0429927		0.23494	55.9226	82.7824	0.34538
0.142398	71.1103	82.9472	0.342239		0.19	52.7335	82.4736	0.00937236		0.19	61.7663	83.2084	0.407868		0.19	78.6187	82.9302	0.065374		0.23733	57.4995	82.7897	0.36845
0.144	72.8281	83.0835	0.351662		0.192	54.3333	82.4852	0.0137305		0.192	62.9893	83.2945	0.424603		0.192	80.5321	83.0779	0.0482096		0.239785	58.8783	82.7813	0.360356
0.145385	74.381	83.1136	0.344192		0.194	55.9441	82.4952	0.00653845		0.194	64.2633	83.2206	0.409961		0.194	82.1645	82.9607	0.0644079		0.242322	60.261	82.7274	0.351398
0.146848	75.9634	83.1098	0.354645		0.196	57.7176	82.5169	0.020504		0.196	65.7248	83.2029	0.411024		0.196	83.4075	83.0923	0.0492509		0.244938	61.4188	82.8057	0.353191
0.148393	77.7707	83.1727	0.371539		0.198	59.2803	82.5075	-2.03033e-05		0.198	67.1448	83.1568	0.421404		0.198	84.6068	82.9746	0.0566576		0.247323	62.6437	82.8165	0.381846
0.15	79.543	83.2884	0.360121		0.2	60.5802	82.5191	0.012539		0.2	68.7163	83.2495	0.430056		0.2	85.3624	83.2951	0.0689915		0.249776	63.8287	82.7625	0.368572
0.15138	80.8801	83.2003	0.347623		0.202	61.7214	82.5202	0.0306481		0.202	70.2862	83.2062	0.430904		0.202	86.3194	83.3601	0.0876802		0.252314	65.1188	82.7982	0.381276
0.152842	82.2322	83.2129	0.367378		0.204	63.1254	82.5258	0.0200209		0.204	71.8069	83.2312	0.43859		0.204	87.2239	83.4378	0.0760548		0.254935	66.6263	82.8165	0.364292
0.154388	83.59	83.2658	0.387657		0.206	64.3274	82.6302	0.0150938		0.206	73.4559	83.2895	0.430185		0.206	88.0929	83.8705	0.107625		0.257316	67.839	82.7232	0.391357
0.156	84.6953	83.2923	0.371167		0.208	65.6943	82.5997	0.0314746		0.208	74.9849	83.2318	0.434232		0.208	88.9752	84.4821	0.0857265		0.259767	69.4044	82.8764	0.382449
0.157376	85.4944	83.3232	0.355722		0.21	66.7846	82.673	0.0355966		0.21	76.6118	83.339	0.469677		0.21	89.8078	84.837	0.0927254		0.262307	70.9058	82.863	0.384138
0.158836	86.2378	83.4988	0.379654		0.212	68.4049	82.6191	0.0248514		0.212	77.9228	83.3145	0.453189		0.212	90.8599	85.5752	0.104898		0.264933	72.386	82.9639	0.385284
0.160384	87.0167	83.7212	0.387572		0.214	69.873	82.6624	0.0276102		0.214	79.5984	83.3284	0.455679		0.214	92.021	86.3456	0.102247		0.267309	73.8092	83.0244	0.387498
0.162	87.8562	83.9888	0.369363		0.216	71.548	82.6996	0.0316893		0.216	81.0776	83.4184	0.448498		0.216	93.0107	87.2298	0.116556		0.269758	75.2693	82.9426	0.386736
0.163371	88.6085	84.1396	0.382754		0.218	72.9752	82.6519	0.0373678		0.218	82.4173	83.4789	0.462786		0.218	94.0888	88.4585	0.125004		0.2723	76.8558	82.9423	0.402806
0.164829	89.5913	84.4524	0.409031		0.22	74.5368	82.6224	0.0242503		0.22	83.4308	83.4995	0.468883		0.22	95.2527	89.736	0.133624		0.27493	78.2328	82.9506	0.425435
0.166379	90.5712	84.9176	0.415224		0.222	75.9773	82.7496	0.0428102		0.222	84.2456	83.4967	0.469516		0.222	96.5941	91.0941	0.138014		0.277301	79.7218	83.0949	0.390219
0.168	91.3395	85.4541	0.417615		0.224	77.4847	82.5986	0.0386667		0.224	85.1451	83.6689	0.481034		0.224	97.7232	92.4238	0.138068		0.279749	81.0191	82.9931	0.415938
0.169367	92.064	85.9749	0.421436		0.226	78.9556	82.7185	0.0501418		0.226	86.195	83.9677	0.495697		0.226	98.6381	94.0379	0.157046		0.282293	82.0651	83.1597	0.41008
0.170823	93.0591	86.6941	0.426535		0.228	80.6699	82.8513	0.0421232		0.228	86.8129	83.9672	0.500088		0.228	100.059	95.421	0.171967		0.284927	83.1989	83.254	0.429758
0.172375	94.1087	87.5179	0.429432		0.23	81.7436	82.9407	0.0686265		0.23	87.6045	84.426	0.496717		0.23	101.271	96.944	0.161007		0.287294	83.9264	83.4327	0.42959
0.174	95.157	88.4329	0.429015		0.232	82.8898	82.9063	0.0697215		0.232	88.3269	84.877	0.498961		0.232	102.404	98.6009	0.171302		0.28974	84.6663	83.6815	0.426724
0.175362	96.0725	89.3638	0.43348		0.234	83.9552	82.9829	0.0647729		0.234	89.2596	85.4796	0.478877		0.234	103.533	100.235	0.174307		0.292285	85.5262	83.9919	0.440783
0.176817	97.0344	90.46	0.442221		0.236	84.8408	82.9701	0.0936271		0.236	90.2592	86.1267	0.504564		0.236	104.511	101.776	0.197333		0.294925	86.3962	84.4812	0.458712
0.17837	98.0795	91.5481	0.450068		0.238	85.5815	83.1912	0.0605006		0.238	91.1774	86.9843	0.502879		0.238	105.685	103.348	0.191558		0.297287	87.2414	85.1223	0.462509
0.18	99.2538	92.6993	0.458599		0.24	86.315	83.1496	0.0703011		0.24	92.1405	87.7947	0.507194		0.24	106.811	104.815	0.201519		0.299731	88.1222	85.6701	0.451817
0.181358	100.293	93.9299	0.46088		0.242	87.0397	83.6589	0.100111		0.242	93.2375	88.9167	0.517306		0.242	107.909	106.09	0.20826		0.302278	89.0926	86.6054	0.46223
0.182811	101.387	95.3352	0.458052		0.244	87.9209	83.9211	0.0953983		0.244	94.3405	89.9693	0.529372		0.244	108.808	107.435	0.215055		0.304922	90.1462	87.5541	0.467884
0.184366	102.668	96.7582	0.466727		0.246	88.6843	84.4732	0.100873		0.246	95.4629	91.1774	0.536725		0.246	109.755	108.602	0.244865		0.30728	91.2757	88.5172	0.476093
0.186	104.035	98.2782	0.476526		0.248	89.4991	84.9575	0.0970943		0.248	96.4498	92.406	0.559707		0.248	110.635	109.584	0.248246		0.309722	92.336	89.6651	0.47477
0.187353	105.132	99.7124	0.485305		0.25	90.2614	85.7124	0.103224		0.25	97.6789	93.8057	0.536338		0.25	111.615	110.653	0.250264		0.312271	93.3252	90.8888	0.482461
0.188804	106.218	101.15	0.515969		0.252	91.0812	86.405	0.113003		0.252	98.684	95.2743	0.556884		0.252	112.526	111.516	0.265647		0.31492	94.4796	92.2683	0.4878
0.190361	107.283	102.686	0.532677		0.254	92.1134	87.2732	0.112595		0.254	99.916	96.7046	0.548125		0.254	113.209	112.279	0.269597		0.317272	95.6352	93.4487	0.478363
0.192	108.471	104.298	0.521235		0.256	93.1412	88.3629	0.128686		0.256	100.87	98.1288	0.576131		0.256	113.914	112.952	0.291485		0.319713	96.6631	94.7618	0.512193
0.193349	109.71	105.649	0.524231		0.258	94.0772	89.395	0.12801		0.258	101.79	99.4718	0.59146		0.258	114.567	113.534	0.283509		0.322263	97.5971	96.0771	0.522984
0.194798	110.887	107.03	0.528927		0.26	95.0369	90.6891	0.129266		0.26	102.827	100.649	0.589281		0.26	115.206	113.889	0.290937		0.324917	98.6787	97.2155	0.533714
0.196357	111.953	108.453	0.520389		0.262	96.1284	91.8833	0.139517		0.262	103.908	101.99	0.588068		0.262	115.781	114.377	0.30252		0.327265	99.5448	98.5139	0.524463
0.198	113.126	110.011	0.536446		0.264	97.1882	93.2647	0.128525		0.264	104.722	103.404	0.580242		0.264	116.383	114.72	0.303905		0.329705	100.416	99.623	0.524112
0.199344	114.148	111.43	0.562471		0.266	98.3162	94.5273	0.138025		0.266	105.674	104.534	0.61514		0.266	116.89	115.064	0.327316		0.332256	101.08	100.553	0.528531
0.200792	115.2	112.593	0.567451		0.268	99.1526	95.892	0.163433		0.268	106.468	105.623	0.613186		0.268	117.666	115.266	0.336194		0.334915	101.827	101.494	0.554156
0.202352	116.247	113.857	0.580952		0.27	100.027	97.275	0.167072		0.27	107.294	106.636	0.616149		0.27	118.056	115.513	0.34885		0.337258	102.458	102.238	0.557098
0.204	117.22	115.289	0.599489		0.272	100.993	98.5709	0.178784		0.272	108.115	107.479	0.636083		0.272	118.613	115.812	0.366175		0.339696	103.137	102.977	0.571565
0.20534	118.062	116.296	0.593365		0.274	101.921	99.8634	0.178859		0.274	108.798	108.348	0.637683		0.274	119.113	115.975	0.364136		0.342249	103.792	103.501	0.588432
0.206786	119.069	117.386	0.597201		0.276	102.695	101.119	0.176036		0.276	109.416	108.968	0.631478		0.276	119.669	116.373	0.38524		0.344912	104.446	104.002	0.579255
0.208348	120.039	118.486	0.612465		0.278	103.471	102.354	0.195347		0.278	110.174	109.601	0.659313		0.278	120.348	116.652	0.418527		0.347251	104.836	104.274	0.571161
0.21	120.972	119.411	0.612253		0.28	104.298	103.507	0.203634		0.28	110.777	110.169	0.672945		0.28	120.949	117.028	0.411689		0.349687	105.297	104.623	0.600237
0.211335	121.726	120.277	0.627239		0.282	105.118	104.51	0.213434		0.282	111.425	110.746	0.672666		0.282	121.622	117.495	0.431527		0.352242	105.855	105.033	0.622169
0.21278	122.418	121.108	0.660596		0.284	105.917	105.349	0.209774		0.284	111.849	111.072	0.684861		0.284	122.26	117.802	0.413783		0.35491	106.374	105.269	0.621149
0.214343	123.162	121.795	0.666941		0.286	106.461	106.249	0.209173		0.286	112.408	111.672	0.698504		0.286	122.804	118.408	0.456785		0.357243	106.715	105.546	0.619847
0.216	124.033	122.594	0.651874		0.288	107.34	106.988	0.229772		0.288	112.921	111.719	0.686567		0.288	123.599	118.997	0.454821		0.359678	107.215	105.739	0.644082
0.217331	124.631	123.189	0.652413		0.29	107.772	107.562	0.24333		0.29	113.415	112.055	0.67097		0.29	124.208	119.627	0.472125		0.362234	107.705	106.013	0.662481
0.218773	125.264	123.764	0.669326		0.292	108.305	108.221	0.241945		0.292	113.842	112.24	0.723172		0.292	124.875	120.308	0.466607		0.364907	108.311	106.353	0.653868
0.220339	125.941	124.351	0.685729		0.294	108.792	108.699	0.249105		0.294	114.321	112.55	0.741464		0.294	125.592	121.139	0.473177		0.367236	108.835	106.691	0.667069
0.222	126.559	124.842	0.700844		0.296	109.243	109.087	0.255782		0.296	114.979	112.929	0.743654		0.296	126.273	121.901	0.535834		0.369669	109.259	107.028	0.680725
0.223326	127.064	125.138	0.708992		0.298	109.667	109.344	0.265303		0.298	115.433	113.164	0.744351		0.298	126.804	122.762	0.521643		0.372227	109.859	107.465	0.685206
0.224767	127.791	125.641	0.711231		0.3	110.09	109.636	0.279484		0.3	115.942	113.418	0.770994		0.3	127.598	123.579	0.508826		0.374905	110.475	108.064	0.696497
0.226334	128.531	126.126	0.722775		0.302	110.53	109.889	0.286815		0.302	116.423	113.691	0.782105		0.302	128.188	124.509	0.559428		0.377229	110.972	108.434	0.703215
0.228	129.106	126.481	0.746799		0.304	110.956	110.127	0.281051		0.304	116.999	114.078	0.788738		0.304	128.87	125.051	0.54265		0.37966	111.583	108.998	0.710437
0.229322	129.455	126.716	0.753206		0.306	111.258	110.097	0.311494		0.306	117.608	114.34	0.792989		0.306	129.281	125.973	0.565729		0.38222	112.231	109.641	0.734189
0.230761	130.013	127.11	0.746052		0.308	111.498	110.344	0.301114		0.308	118.238	114.994	0.799591		0.308	129.791	126.792	0.584128		0.384902	112.776	110.314	0.747084
0.23233	130.569	127.541	0.774727		0.31	111.978	110.43	0.337106		0.31	118.77	115.33	0.82632		0.31	130.406	127.342	0.615591		0.387222	113.375	110.868	0.741665
0.234	131.161	128.001	0.808501		0.312	112.281	110.549	0.310957		0.312	119.384	115.976	0.815929		0.312	130.919	128.223	0.623814		0.389651	113.782	111.472	0.765606
0.235317	131.71	128.308	0.790801		0.314	112.785	110.737	0.316711		0.314	120.051	116.496	0.858845		0.314	131.337	128.853	0.616224		0.392213	114.318	112.25	0.752594
0.236755	132.222	128.747	0.779797		0.316	113.118	110.863	0.348066		0.316	120.712	117.118	0.850762		0.316	131.757	129.445	0.642041		0.394899	114.991	112.855	0.787991
0.238325	132.716	129.187	0.809168		0.318	113.505	111.125	0.35192		0.318	121.367	117.751	0.823143		0.318	132.089	129.98	0.645605		0.397214	115.45	113.437	0.794182
0.24	133.39	129.603	0.825837		0.32	114.121	111.396	0.361796		0.32	121.941	118.335	0.882021		0.32	132.468	130.398	0.677497		0.399642	115.744	114.013	0.78361
0.241313	133.853	129.937	0.826631		0.322	114.468	111.639	0.385218		0.322	122.54	119.15	0.865114		0.322	132.753	130.907	0.687437		0.402205	116.234	114.538	0.817978
0.242749	134.388	130.465	0.842229		0.324	115.18	111.905	0.376577		0.324	123.224	119.849	0.898488		0.324	132.856	131.222	0.712073		0.404897	116.649	115.038	0.836405
0.24432	135.104	131.069	0.854281		0.326	115.635	112.349	0.392668		0.326	123.759	120.425	0.916909		0.326	133.188	131.565	0.725587		0.407207	116.923	115.439	0.841704
0.246	135.827	131.718	0.865844		0.328	116.116	112.789	0.399517		0.328	124.28	121.027	0.905648		0.328	133.468	131.859	0.737363		0.409633	117.089	116.005	0.837728
0.247308	136.277	132.133	0.885817		0.33	116.682	113.261	0.418549		0.33	124.904	121.887	0.918959		0.33	133.544	132.019	0.737878		0.412198	117.51	116.339	0.860515
0.248742	136.867	132.596	0.887382		0.332	117.197	113.832	0.404208		0.332	125.498	122.55	0.933687		0.332	133.756	132.207	0.779807		0.414894	117.844	116.743	0.883867
0.250316	137.525	133.243	0.885253		0.334	117.859	114.326	0.433921		0.334	125.994	123.214	0.938796		0.334	133.873	132.421	0.771853		0.4172	117.977	117.155	0.899289
0.252	138.187	134.008	0.903673		0.336	118.298	114.918	0.44108		0.336	126.573	123.885	0.969121		0.336	134.002	132.594	0.77151		0.419624	118.136	117.308	0.907148
0.253303	138.729	134.518	0.920527		0.338	118.83	115.546	0.435649		0.338	126.866	124.349	0.969701		0.338	134.115	132.701	0.827286		0.422191	118.418	117.587	0.908981
0.254736	139.392	135.134	0.940657		0.34	119.365	116.062	0.457912		0.34	127.293	124.922	0.977762		0.34	134.063	132.772	0.836292		0.424892	118.651	117.907	0.923638
0.256311	140.082	135.839	0.963594		0.342	119.715	116.552	0.448756		0.342	127.708	125.525	1.00445		0.342	134.231	132.658	0.828896		0.427193	118.802	118.244	0.938143
0.258	140.86	136.652	0.9634		0.344	120.282	117.333	0.472693		0.344	128.007	125.913	1.00742		0.344	134.309	132.868	0.860778		0.429615	118.928	118.567	0.925639
0.259299	141.439	137.383	0.961274		0.346	120.646	117.906	0.497705		0.346	128.246	126.311	1.01029		0.346	134.423	132.814	0.889836		0.432184	119.237	118.581	0.963234
0.26073	141.969	138.08	0.978474		0.348	121.021	118.471	0.494484		0.348	128.538	126.918	1.04304		0.348	134.597	132.989	0.885628		0.434889	119.47	118.838	0.974206
0.262307	142.46	138.694	0.981562		0.35	121.417	119.06	0.507162		0.35	128.739	127.178	1.05755		0.35	134.762	133.064	0.921063		0.437185	119.59	119.008	0.989893
0.264	143.129	139.354	1.00097		0.352	121.76	119.46	0.523017		0.352	128.966	127.428	1.03818		0.352	134.792	133.074	0.92146		0.439606	119.726	119.202	1.00774
0.265294	143.659	139.913	1.04906		0.354	122.012	119.991	0.535147		0.354	129.154	127.801	1.08802		0.354	135.028	133.285	0.961425		0.442176	120.069	119.493	1.00964
0.266724	144.105	140.695	1.05649		0.356	122.1	120.42	0.548715		0.356	129.144	128.065	1.07388		0.356	135.246	133.42	0.958483		0.444887	120.253	119.685	1.03584
0.268302	144.682	141.372	1.05857		0.358	122.463	120.81	0.564881		0.358	129.358	128.17	1.08994		0.358	135.33	133.762	0.959117		0.447178	120.4	119.82	1.03692
0.27	145.31	142.02	1.08357		0.36	122.634	121.215	0.56662		0.36	129.549	128.582	1.12769		0.36	135.413	133.572	0.97948		0.449597	120.6	120.078	1.05275
0.27129	145.59	142.721	1.07652		0.362	122.929	121.544	0.563389		0.362	129.626	128.633	1.12366		0.362	135.613	133.948	1.01749		0.452169	120.938	120.279	1.07618
0.272718	146.091	143.394	1.08641		0.364	122.953	121.72	0.58489		0.364	129.671	128.72	1.12717		0.364	135.771	133.981	1.03454		0.454884	121.293	120.467	1.07828
0.274298	146.457	143.918	1.12124		0.366	123.091	121.985	0.605973		0.366	129.801	128.86	1.15665		0.366	135.904	134.137	1.04888		0.457171	121.554	120.642	1.08741
0.276	146.7	144.542	1.12695		0.368	123.132	122.241	0.610095		0.368	129.912	128.986	1.18553		0.368	136.302	134.391	1.07873		0.459588	121.737	120.883	1.12424
0.277285	147.1	144.913	1.13108		0.37	123.149	122.373	0.618296		0.37	129.998	128.932	1.1722		0.37	136.358	134.675	1.09408		0.462162	122.005	121.038	1.12472
0.278711	147.449	145.332	1.14791		0.372	123.032	122.416	0.62026		0.372	130.048	129.095	1.19406		0.372	136.541	134.75	1.10687		0.464882	122.458	121.329	1.14112
0.280293	147.599	145.86	1.15754		0.374	123.057	122.611	0.646163		0.374	130.045	129.267	1.20897		0.374	136.579	134.855	1.13526		0.467164	122.472	121.386	1.15646
0.282	147.996	146.364	1.16716		0.376	123.09	122.692	0.652926		0.376	130.128	129.321	1.21862		0.376	136.773	134.898	1.14829		0.469579	122.485	121.517	1.14816
0.283281	148.154	146.603	1.18076		0.378	123.083	122.599	0.670906		0.378	130.215	129.506	1.24981		0.378	136.801	135.147	1.15283		0.472155	122.74	121.817	1.188
0.284705	148.248	146.927	1.19841		0.38	123.089	122.626	0.674137		0.38	130.329	129.4	1.25958		0.38	136.763	135.357	1.16426		0.474879	122.948	121.964	1.17781
0.286289	148.423	147.275	1.21001		0.382	123.113	122.852	0.698225		0.382	130.684	129.527	1.27523		0.382	136.971	135.394	1.19051		0.477156	123.002	121.943	1.19965
0.288	148.74	147.663	1.22253		0.384	123.006	122.543	0.681909		0.384	130.57	129.6	1.28818		0.384	136.815	135.372	1.20322		0.47957	123.071	122.124	1.23831
0.289276	148.824	147.801	1.24239		0.386	123.112	122.495	0.714413		0.386	130.498	129.701	1.29621		0.386	136.837	135.452	1.22476		0.482147	123.11	122.308	1.23927
0.290699	148.742	147.871	1.25981		0.388	123.033	122.588	0.735066		0.388	130.622	129.673	1.30449		0.388	136.805	135.506	1.25265		0.484877	123.356	122.432	1.26869
0.292284	148.761	148.025	1.27633		0.39	123.023	122.546	0.7474		0.39	130.792	129.589	1.31993		0.39	136.743	135.444	1.27265		0.487149	123.336	122.549	1.26344
0.294	149.071	148.288	1.28334		0.392	122.971	122.367	0.738512		0.392	130.748	129.641	1.33197		0.392	136.767	135.355	1.27917		0.489561	123.278	122.544	1.27774
0.295272	149.106	148.307	1.28991		0.394	122.823	122.253	0.759208		0.394	130.905	129.702	1.34438		0.394	136.644	135.276	1.30256		0.49214	123.351	122.715	1.28187
0.296693	149.078	148.522	1.32819		0.396	122.873	122.213	0.776125		0.396	130.997	129.763	1.33985		0.396	136.405	135.271	1.31124		0.494874	123.585	122.898	1.31763
0.29828	149.064	148.713	1.34765		0.398	122.829	122.178	0.790896		0.398	131.008	129.728	1.36702		0.398	136.39	135.139	1.33882		0.497142	123.516	123.035	1.33666
0.3	149.231	148.773	1.34406		0.4	122.889	122.143	0.791057		0.4	131.031	129.597	1.40902		0.4	136.143	135.288	1.35906		0.499552	123.505	123.085	1.3301
0.301267	149.317	148.689	1.36203		0.402	123.041	122.092	0.811378		0.402	131.011	129.726	1.41165		0.402	136.114	134.966	1.37526		0.502133	123.593	123.229	1.34443
0.302687	149.292	148.693	1.36668		0.404	123.057	122.013	0.817217		0.404	131.043	129.633	1.42358		0.404	135.843	134.882	1.40456		0.504871	123.757	123.432	1.35511
0.304275	149.288	148.817	1.37218		0.406	123.014	121.967	0.8424		0.406	130.916	129.719	1.44229		0.406	135.766	134.779	1.4208		0.507135	123.623	123.548	1.39162
0.306	149.477	148.878	1.40602		0.408	123.081	122.126	0.864953		0.408	130.876	129.667	1.46545		0.408	135.603	134.704	1.42994		0.509543	123.619	123.848	1.37461
0.307263	149.382	148.551	1.42334		0.41	122.98	121.932	0.851761		0.41	130.753	129.509	1.47682		0.41	135.397	134.667	1.45929		0.512126	123.684	123.993	1.40709
0.30868	149.323	148.646	1.43907		0.412	122.872	121.852	0.856258		0.412	130.683	129.508	1.51333		0.412	135.259	134.589	1.5056		0.514869	124.016	124.234	1.41928
0.310271	149.29	148.806	1.45201		0.414	122.723	121.845	0.886369		0.414	130.601	129.427	1.49527		0.414	135.023	134.501	1.48337		0.517127	123.944	124.334	1.44179
0.312	149.321	148.817	1.44226		0.416	122.805	121.942	0.901182		0.416	130.466	129.171	1.51406		0.416	134.798	134.373	1.50498		0.519534	124.203	124.605	1.44104
0.313258	149.288	148.884	1.4544		0.418	122.672	121.714	0.909405		0.418	130.486	129.132	1.5409		0.418	134.858	134.472	1.52692		0.522118	124.592	124.828	1.46242
0.314674	149.288	148.893	1.49477		0.42	122.613	121.495	0.908858		0.42	130.126	128.956	1.54406		0.42	134.594	134.42	1.53836		0.524866	124.638	124.974	1.47204
0.316266	149.322	148.742	1.5129		0.422	122.455	121.534	0.943874		0.422	129.898	128.828	1.55803		0.422	134.353	134.377	1.57036		0.52712	124.682	125.076	1.48998
0.318	149.538	148.849	1.51802		0.424	122.364	121.291	0.949456		0.424	129.699	128.626	1.57505		0.424	134.3	134.447	1.57696		0.529525	124.798	125.166	1.50377
0.319254	149.476	148.751	1.53221		0.426	122.201	121.143	0.974757		0.426	129.395	128.549	1.59563		0.426	134.209	134.45	1.60195		0.532111	124.924	125.365	1.54734
0.320668	149.437	148.684	1.54466		0.428	122.051	120.933	0.975573		0.428	129.091	128.568	1.61139		0.428	134.024	134.44	1.62057		0.534864	125.142	125.475	1.53973
0.322262	149.582	148.722	1.56175		0.43	121.909	120.646	0.986704		0.43	128.955	128.296	1.6232		0.43	134.005	134.312	1.64089		0.537113	125.163	125.531	1.55712
0.324	149.765	148.839	1.58287		0.432	121.679	120.594	0.988035		0.432	128.683	128.183	1.65207		0.432	134.02	134.393	1.66219		0.539516	125.23	125.589	1.56423
0.325249	149.639	148.77	1.5884		0.434	121.489	120.436	0.998502		0.434	128.5	128.011	1.65192		0.434	133.908	134.248	1.69406		0.542104	125.44	125.623	1.57088
0.326662	149.653	148.717	1.60564		0.436	121.2	120.285	1.00566		0.436	128.246	127.922	1.67252		0.436	133.996	134.378	1.70444		0.544861	125.61	125.69	1.59914
0.328257	149.739	148.785	1.634		0.438	120.98	120.031	1.03383		0.438	128.092	127.748	1.68191		0.438	133.711	134.205	1.69725		0.547106	125.65	125.569	1.59583
0.33	149.8	148.934	1.64746		0.44	120.837	119.968	1.04923		0.44	127.953	127.65	1.69831		0.44	133.686	134.332	1.72331		0.549508	125.787	125.547	1.63047
0.331245	149.685	148.782	1.65389		0.442	120.556	119.677	1.06119		0.442	127.718	127.651	1.71745		0.442	133.668	134.112	1.743		0.552097	125.765	125.53	1.63874
0.332656	149.634	148.807	1.66672		0.444	120.077	119.446	1.04447		0.444	127.447	127.38	1.71424		0.444	133.497	134.071	1.76443		0.554859	125.801	125.593	1.65423
0.334253	149.569	148.865	1.68442		0.446	120.076	119.264	1.07809		0.446	127.245	127.358	1.73198		0.446	133.307	133.888	1.79565		0.557098	125.824	125.476	1.67766
0.336	149.731	148.957	1.7057		0.448	119.771	119.162	1.1061		0.448	127.195	127.445	1.7547		0.448	133.206	133.857	1.79806		0.559499	125.884	125.468	1.66645
0.33724	149.772	148.981	1.71557		0.45	119.571	119.019	1.12361		0.45	126.977	127.206	1.77259		0.45	133.206	133.603	1.82104		0.562089	125.918	125.522	1.69168
0.338649	149.642	148.882	1.72257		0.452	119.356	119.046	1.12791		0.452	126.942	127.206	1.78513		0.452	133.303	133.537	1.84767		0.564856	125.959	125.618	1.70942
0.340248	149.582	148.749	1.74397		0.454	119.117	118.846	1.12265		0.454	126.707	127.142	1.79504		0.454	133.238	133.336	1.87248		0.567091	126.069	125.553	1.72178
0.342	149.748	148.859	1.75512		0.456	118.757	118.826	1.15298		0.456	126.668	127.1	1.8279		0.456	133.073	132.959	1.88237		0.56949	126.023	125.633	1.75684
0.343236	149.57	148.756	1.75452		0.458	118.451	118.496	1.1867		0.458	126.585	127.089	1.81329		0.458	133.052	132.906	1.89038		0.572082	126.139	125.656	1.74923
0.344643	149.423	148.7	1.78125		0.46	118.268	118.492	1.17836		0.46	126.382	127.011	1.84677		0.46	132.885	132.689	1.92235		0.574854	126.222	125.878	1.76711
0.346243	149.423	148.566	1.7934		0.462	118.083	118.654	1.17965		0.462	126.269	126.964	1.85653		0.462	132.82	132.341	1.94327		0.577084	126.305	126.053	1.77993
0.348	149.387	148.419	1.79265		0.464	117.808	118.32	1.19433		0.464	126.302	126.956	1.87764		0.464	132.551	132.311	1.9704		0.579481	126.497	126.253	1.8028
0.349231	149.091	148.278	1.82697		0.466	117.983	118.543	1.21888		0.466	126.179	126.733	1.87751		0.466	132.488	131.916	1.98072		0.582075	126.417	126.283	1.82937
0.350637	148.944	148.195	1.84532		0.468	117.722	118.495	1.23995		0.468	126.063	126.745	1.91316		0.468	132.286	131.738	1.99855		0.584851	126.596	126.719	1.83255
0.352239	148.896	148.109	1.83438		0.47	117.683	118.381	1.25462		0.47	126.051	126.693	1.91741		0.47	132.096	131.568	2.01684		0.587077	126.739	126.907	1.83551
0.354	148.878	148.147	1.85384		0.472	117.565	118.36	1.26166		0.472	125.892	126.505	1.93652		0.472	132.129	131.301	2.03645		0.589472	126.752	127.022	1.86351
0.355226	148.559	147.892	1.88274		0.474	117.371	118.236	1.2579		0.474	125.924	126.323	1.94539		0.474	131.974	131.189	2.05553		0.592068	126.955	127.257	1.87105
0.356631	148.239	147.716	1.89806		0.476	117.222	118.056	1.28154		0.476	125.721	126.192	1.96228		0.476	131.782	131.142	2.05796		0.594849	127.187	127.705	1.89839
0.358234	148.072	147.678	1.90988		0.478	117.13	118.138	1.28438		0.478	125.756	126.022	1.9801		0.478	131.681	131.089	2.08257		0.597069	127.276	127.629	1.9177
0.36	148.066	147.653	1.91364		0.48	117.066	118.004	1.28694		0.48	125.585	125.836	2.00301		0.48	131.547	131.022	2.09957		0.599463	127.474	127.957	1.9144
0.361222	147.721	147.381	1.92083		0.482	116.94	117.919	1.31723		0.482	125.531	125.713	2.0219		0.482	131.359	131.013	2.11189		0.60206	127.564	128.196	1.92514
0.362624	147.357	147.193	1.95		0.484	116.823	117.852	1.29294		0.484	125.383	125.496	2.0354		0.484	131.16	130.93	2.14894		0.604846	127.884	128.422	1.94867
0.36423	147.207	147.105	1.9605		0.486	116.718	117.606	1.3121		0.486	125.228	125.333	2.05018		0.486	131.055	130.957	2.15728		0.607062	128.009	128.577	1.96252
0.366	147.172	147.02	1.9624		0.488	116.667	117.468	1.3511		0.488	125.14	125.072	2.06532		0.488	131.022	131.056	2.17774		0.609454	128.194	128.643	1.97053
0.367217	146.779	146.65	1.99598		0.49	116.613	117.11	1.37572		0.49	124.938	124.985	2.07059		0.49	130.882	131.106	2.18315		0.612053	128.286	128.875	1.99132
0.368618	146.46	146.49	2.02555		0.492	116.406	117.097	1.37021		0.492	124.793	124.62	2.09224		0.492	130.85	131.113	2.21834		0.614844	128.504	129.05	1.99195
0.370225	146.323	146.486	2.03597		0.494	116.275	116.935	1.37333		0.494	124.625	124.506	2.08712		0.494	130.817	131.364	2.22799		0.617055	128.512	128.964	2.0062
0.372	146.118	146.461	2.04508		0.496	116.272	116.706	1.42468		0.496	124.502	124.365	2.11287		0.496	130.947	131.353	2.25777		0.619445	128.607	129.103	2.03171
0.373213	145.597	146.233	2.04898		0.498	116.041	116.32	1.41202		0.498	124.325	124.195	2.13067		0.498	130.699	131.447	2.2576		0.622046	128.803	129.152	2.04871
0.374612	145.366	146.073	2.06725		0.5	115.916	115.983	1.41815		0.5	124.133	123.96	2.14371		0.5	130.706	131.643	2.29003		0.624841	128.767	129.167	2.06553
0.376221	145.281	145.833	2.0719		0.502	115.745	115.841	1.43334		0.502	124.094	123.845	2.16286		0.502	130.81	131.647	2.31087		0.627048	128.783	129.143	2.06069
0.378	145.136	145.675	2.07205		0.504	115.578	115.502	1.44313		0.504	123.817	123.675	2.17017		0.504	130.675	131.833	2.33019		0.629436	128.838	129.06	2.07903
0.379208	144.828	145.531	2.10953		0.506	115.471	115.418	1.4627		0.506	123.786	123.61	2.19915		0.506	130.748	132.051	2.32525		0.632039	128.898	129.099	2.09764
0.380606	144.634	145.5	2.13914		0.508	115.34	114.96	1.47214		0.508	123.69	123.495	2.1991		0.508	130.651	132.033	2.37708		0.634838	129.127	129.006	2.10354
0.382216	144.442	145.379	2.14385		0.51	115.099	114.864	1.47557		0.51	123.53	123.469	2.192		0.51	130.803	132.092	2.36857		0.63704	129.221	129.079	2.15166
0.384	144.313	145.327	2.16353		0.512	114.947	114.59	1.49045		0.512	123.43	123.352	2.22511		0.512	130.873	132.02	2.4002		0.639427	129.19	129.021	2.13869
0.385204	143.998	145.147	2.17658		0.514	114.735	114.473	1.50015		0.514	123.298	123.369	2.26345		0.514	130.849	132.167	2.39326		0.642031	129.206	129.112	2.15487
0.3866	143.766	144.977	2.1819		0.516	114.58	114.353	1.51576		0.516	123.217	123.297	2.24878		0.516	130.963	132.2	2.42611		0.644836	129.38	129.114	2.16305
0.388212	143.624	144.859	2.20193		0.518	114.38	114.153	1.52327		0.518	123.08	123.334	2.26049		0.518	130.932	132.209	2.4471		0.647033	129.245	129.176	2.17992
0.39	143.499	144.799	2.22138		0.52	114.051	114.002	1.5444		0.52	123.094	123.398	2.27135		0.52	130.841	132.104	2.47134		0.649418	129.317	129.204	2.19111
0.391199	143.126	144.538	2.22802		0.522	114.079	113.921	1.55744		0.522	123	123.714	2.29023		0.522	130.986	132.219	2.46284		0.652024	129.425	129.296	2.20698
0.392593	142.908	144.499	2.23956		0.524	113.906	113.877	1.56546		0.524	123.08	123.533	2.30478		0.524	130.862	132.145	2.50745		0.654833	129.471	129.343	2.22793
0.394207	142.834	144.434	2.2437		0.526	113.785	113.899	1.57162		0.526	122.919	123.697	2.32508		0.526	130.824	132.126	2.49328		0.657026	129.56	129.524	2.23292
0.396	142.81	144.31	2.25273		0.528	113.829	113.938	1.5924		0.528	123.044	123.769	2.35151		0.528	130.8	132.001	2.52793		0.659409	129.531	129.603	2.25254
0.397195	142.607	144.109	2.28296		0.53	113.594	113.908	1.60951		0.53	123.047	124.029	2.35005		0.53	130.891	131.878	2.5432		0.662017	129.658	129.705	2.23984
0.398587	142.485	143.912	2.30071		0.532	113.292	113.803	1.60492		0.532	122.987	124	2.36284		0.532	130.907	131.595	2.54932		0.664831	129.891	130.035	2.28237
0.400203	142.336	143.754	2.30004		0.534	113.367	113.746	1.6378		0.534	123.022	124.094	2.39128		0.534	130.732	131.911	2.57634		0.667019	129.943	130.006	2.27561
0.402	142.205	143.685	2.31203		0.536	113.153	113.94	1.63103		0.536	123.101	124.121	2.4104		0.536	130.677	131.444	2.60381		0.6694	129.957	130.362	2.28141
0.40319	141.928	143.293	2.32513		0.538	113.219	114.071	1.63394		0.538	123.161	124.391	2.41346		0.538	130.61	131.299	2.61777		0.67201	130.13	130.563	2.29963
0.404581	141.723	143.117	2.34074		0.54	113.186	114.151	1.6281		0.54	123.054	124.454	2.44961		0.54	130.605	131.358	2.62218		0.674828	130.176	130.599	2.32777
0.406198	141.57	143.053	2.36228		0.542	113.165	114.234	1.66267		0.542	123.258	124.509	2.43515		0.542	130.613	131.051	2.65092		0.677011	130.28	130.862	2.34229
0.408	141.614	142.897	2.37546		0.544	113.201	114.338	1.68698		0.544	123.302	124.635	2.45088		0.544	130.504	130.979	2.6699		0.679391	130.411	130.951	2.33749
0.409186	141.438	142.592	2.38073		0.546	113.173	114.282	1.68379		0.546	123.308	124.701	2.42759		0.546	130.416	130.886	2.69124		0.682002	130.605	131.082	2.36635
0.410575	141.067	142.337	2.3968		0.548	113.275	114.416	1.70052		0.548	123.344	124.775	2.47305		0.548	130.311	130.723	2.70423		0.684826	130.781	131.315	2.38149
0.412194	140.816	142.124	2.41436		0.55	113.156	114.539	1.70298		0.55	123.402	124.613	2.49658		0.55	130.362	130.583	2.73712		0.687004	130.871	131.339	2.39878
0.414	140.851	141.938	2.42967		0.552	113.264	114.604	1.71707		0.552	123.402	124.62	2.49603		0.552	130.276	130.526	2.73035		0.689382	130.804	131.4	2.40227
0.415181	140.564	141.472	2.43745		0.554	113.157	114.613	1.75073		0.554	123.422	124.617	2.52674		0.554	130.115	130.537	2.73966		0.691995	130.966	131.492	2.4148
0.416569	140.246	141.284	2.43588		0.556	113.061	114.729	1.75738		0.556	123.408	124.41	2.53566		0.556	130.283	130.44	2.75002		0.694823	131.074	131.658	2.42239
0.418189	140.073	141.156	2.45111		0.558	113.194	114.699	1.75539		0.558	123.425	124.487	2.57426		0.558	130.129	130.421	2.77674		0.696997	131.013	131.635	2.4421
0.42	139.933	140.849	2.48625		0.56	113.085	114.632	1.76327		0.56	123.572	124.374	2.5811		0.56	130.251	130.559	2.79309		0.699373	131.11	131.535	2.45063
0.421177	139.469	140.389	2.4947		0.562	113.1	114.562	1.77638		0.562	123.339	124.31	2.56719		0.562	130.18	130.412	2.80398		0.701988	131.116	131.618	2.47238
0.422562	139.087	140.02	2.49117		0.564	113.164	114.552	1.78406		0.564	123.281	124.19	2.58478		0.564	130.259	130.421	2.81901		0.704821	131.382	131.743	2.48554
0.424185	138.952	139.717	2.50848		0.566	113.12	114.496	1.81835		0.566	123.288	124.099	2.6002		0.566	130.206	130.438	2.83898		0.706989	131.303	131.621	2.50083
0.426	138.777	139.53	2.53096		0.568	113.175	114.375	1.80072		0.568	123.286	124.039	2.61565		0.568	130.143	130.612	2.87305		0.709364	131.24	131.675	2.51679
0.427172	138.254	139.08	2.53682		0.57	113.08	114.246	1.81674		0.57	123.364	123.896	2.62283		0.57	130.383	130.624	2.87234		0.711981	131.315	131.625	2.51428
0.428556	138.03	138.7	2.54614		0.572	113.155	114.203	1.83316		0.572	123.298	123.823	2.60959		0.572	130.285	130.829	2.88374		0.714818	131.462	131.707	2.51909
0.43018	137.765	138.358	2.5663		0.574	113.064	114.077	1.85372		0.574	123.221	123.728	2.62936		0.574	130.394	130.877	2.89594		0.716982	131.296	131.615	2.52644
0.432	137.315	138.03	2.58118		0.576	113.099	113.954	1.85385		0.576	123.113	123.585	2.64421		0.576	130.337	131.099	2.91877		0.719355	131.362	131.633	2.54284
0.433168	136.997	137.613	2.59175		0.578	113.057	113.801	1.85524		0.578	123.121	123.523	2.63867		0.578	130.371	131.292	2.90532		0.721973	131.377	131.695	2.56689
0.43455	136.87	137.27	2.6146		0.58	113.11	113.557	1.87578		0.58	123.194	123.518	2.66398		0.58	130.461	131.297	2.93842		0.724815	131.452	131.81	2.56766
0.436176	136.52	136.918	2.6219		0.582	112.996	113.623	1.8618		0.582	123.094	123.48	2.69287		0.582	130.563	131.65	2.95754		0.726975	131.383	131.713	2.58686
0.438	136.304	136.736	2.61701		0.584	113.01	113.513	1.89941		0.584	123.187	123.405	2.69916		0.584	130.666	131.743	2.96257		0.729346	131.36	131.536	2.59081
0.439163	136.03	136.369	2.63585		0.586	112.997	113.323	1.8986		0.586	123.175	123.438	2.71162		0.586	130.752	131.86	2.99355		0.731966	131.438	131.676	2.61274
0.440544	135.624	135.936	2.66766		0.588	113.032	113.117	1.90355		0.588	123.11	123.477	2.72133		0.588	130.783	131.939	2.99196		0.734813	131.561	131.823	2.61991
0.442171	135.257	135.721	2.67709		0.59	112.954	113.145	1.92293		0.59	123.059	123.56	2.72632		0.59	130.847	132.088	3.01395		0.736968	131.617	131.862	2.63717
0.444	135.109	135.614	2.66835		0.592	113.029	112.984	1.92891		0.592	123.216	123.515	2.73517		0.592	130.904	132.321	3.04962		0.739337	131.524	131.822	2.65443
0.445158	134.695	135.112	2.66835		0.594	113.041	113.117	1.96192		0.594	123.197	123.687	2.75106		0.594	130.934	132.343	3.0387		0.741959	131.66	131.915	2.66535
0.446538	134.289	134.82	2.69892		0.596	113.014	113.13	1.95527		0.596	123.29	123.613	2.78353		0.596	131.051	132.495	3.07706		0.74481	131.69	132.098	2.64411
0.448166	134.023	134.65	2.72163		0.598	113.031	113.16	1.96074		0.598	123.22	123.914	2.75969		0.598	131.086	132.522	3.07537		0.746961	131.667	132.037	2.67519
0.45	133.842	134.399	2.72947		0.6	113.112	113.222	1.96499		0.6	123.348	123.994	2.79945		0.6	131.085	132.601	3.06717		0.749328	131.696	132.058	2.69184
0.451154	133.479	134.077	2.73415		0.602	113.105	113.324	1.98202		0.602	123.252	124.07	2.78201		0.602	131.226	132.574	3.10488		0.751952	131.602	132.216	2.71028
0.452531	133.175	133.867	2.72995		0.604	113.39	113.61	1.99466		0.604	123.458	124.352	2.80173		0.604	131.179	132.566	3.11043		0.754808	131.819	132.293	2.72611
0.454162	132.93	133.734	2.75356		0.606	113.355	113.658	1.99808		0.606	123.39	124.474	2.83088		0.606	131.091	132.564	3.14155		0.756953	131.829	132.18	2.71908
0.456	132.738	133.702	2.78229		0.608	113.614	113.861	2.0077		0.608	123.546	124.746	2.83973		0.608	131.049	132.555	3.1679		0.75932	131.831	132.198	2.73703
0.457149	132.333	133.405	2.76596		0.61	113.66	114.108	2.02337		0.61	123.608	124.746	2.862		0.61	130.978	132.309	3.15837		0.761944	131.876	132.257	2.7396
0.458525	132.029	133.267	2.77357		0.612	113.651	114.204	2.02389		0.612	123.639	125.156	2.84874		0.612	131.14	132.499	3.1649		0.764805	131.999	132.444	2.7589
0.460157	131.785	133.173	2.78536		0.614	113.859	114.386	2.02213		0.614	123.633	125.08	2.87434		0.614	131.07	132.463	3.1855		0.766946	131.927	132.352	2.7768
0.462	131.58	133.009	2.78115		0.616	113.959	114.592	2.01971		0.616	123.867	125.067	2.88028		0.616	131.052	132.263	3.20202		0.769311	131.913	132.387	2.79202
0.463145	131.222	132.787	2.80967		0.618	114.215	114.996	2.04809		0.618	123.853	125.383	2.89357		0.618	130.984	132.155	3.22824		0.771937	131.913	132.406	2.78374
0.464519	130.942	132.688	2.83146		0.62	114.257	115.069	2.07523		0.62	123.967	125.336	2.89511		0.62	130.97	132.107	3.23682		0.774803	132.014	132.557	2.80596
0.466153	130.753	132.576	2.84142		0.622	114.375	115.319	2.07871		0.622	123.994	125.34	2.9085		0.622	130.953	131.989	3.26649		0.776939	132.061	132.565	2.83696
0.468	130.586	132.502	2.85093		0.624	114.467	115.683	2.05994		0.624	123.948	125.531	2.93484		0.624	130.877	131.784	3.25996		0.779302	131.927	132.425	2.83381
0.46914	130.171	132.209	2.84264		0.626	114.717	115.75	2.09713		0.626	124.023	125.567	2.93936		0.626	130.835	131.769	3.25116		0.78193	131.986	132.491	2.82408
0.470513	129.929	132.023	2.87579		0.628	114.837	115.975	2.10298		0.628	123.937	125.501	2.93149		0.628	130.753	131.595	3.26798		0.7848	132.092	132.482	2.85011
0.472148	129.77	131.931	2.89202		0.63	114.927	116.245	2.1128		0.63	124.049	125.552	2.94296		0.63	130.664	131.484	3.29998		0.786931	132.162	132.512	2.85537
0.474	129.539	131.83	2.87387		0.632	114.916	116.326	2.11633		0.632	124.048	125.469	2.96038		0.632	130.744	131.546	3.29527		0.789293	131.981	132.345	2.86512
0.475136	129.162	131.504	2.9018		0.634	115.101	116.743	2.119		0.634	124.155	125.442	2.97934		0.634	130.701	131.481	3.30124		0.791923	131.991	132.408	2.87883
0.476507	128.928	131.26	2.9219		0.636	115.25	116.771	2.13395		0.636	124.231	125.388	2.99319		0.636	130.578	131.342	3.33493		0.794798	132.055	132.489	2.88006
0.478144	128.728	131.087	2.91996		0.638	115.446	116.888	2.14938		0.638	124.215	125.306	2.97695		0.638	130.585	131.423	3.3445		0.796924	132.04	132.5	2.8998
0.48	128.57	130.92	2.94094		0.64	115.505	116.949	2.15297		0.64	124.192	125.25	2.9798		0.64	130.583	131.187	3.37076		0.799284	131.983	132.356	2.90747
0.481131	128.186	130.51	2.94372		0.642	115.571	116.906	2.16018		0.642	124.374	125.085	2.99985		0.642	130.622	131.218	3.37002		0.801915	132.026	132.49	2.91184
0.4825	127.79	130.21	2.95017		0.644	115.701	117.157	2.16405		0.644	124.163	125.027	3.02478		0.644	130.7	131.279	3.38157		0.804795	132.149	132.629	2.9073
0.484139	127.524	130.017	2.96291		0.646	115.824	117.094	2.16611		0.646	124.201	125.045	3.01901		0.646	130.444	131.114	3.39941		0.806917	132.094	132.492	2.92375
0.486	127.429	129.835	2.96508		0.648	115.836	117.166	2.17802		0.648	124.31	124.957	3.03637		0.648	130.461	131.203	3.40072		0.809275	131.939	132.325	2.936
0.487127	126.995	129.42	2.9767		0.65	115.802	117.243	2.18309		0.65	124.262	125.002	3.03685		0.65	130.587	131.332	3.42642		0.811908	131.916	132.333	2.96581
0.488494	126.452	129.056	2.9799		0.652	115.861	117.063	2.19005		0.652	124.29	124.722	3.05366		0.652	130.448	131.273	3.42569		0.814793	132.059	132.513	2.95015
0.490135	126.165	128.678	2.97091		0.654	116.076	117.147	2.20365		0.654	124.259	124.806	3.06778		0.654	130.53	131.417	3.41785		0.81691	131.87	132.423	2.96834
0.492	126.084	128.26	2.9886		0.656	116.007	117.142	2.19777		0.656	124.311	124.895	3.06864		0.656	130.482	131.401	3.44763		0.819266	131.824	132.402	2.97588
0.493122	125.586	127.699	3.02207		0.658	116.163	117.074	2.2248		0.658	124.405	124.84	3.10316		0.658	130.433	131.444	3.45389		0.821901	131.828	132.498	2.98287
0.494488	125.068	127.333	3.04732		0.66	116.208	117.053	2.22124		0.66	124.47	124.842	3.08471		0.66	130.505	131.509	3.47037		0.82479	132.079	132.587	3.00515
0.49613	124.843	127.021	3.04661		0.662	116.262	117.005	2.23158		0.662	124.45	124.872	3.09491		0.662	130.613	131.618	3.4985		0.826902	131.853	132.348	3.01963
0.498	124.626	126.655	3.04852		0.664	116.304	116.91	2.24612		0.664	124.482	124.818	3.11544		0.664	130.442	131.643	3.49227		0.829257	131.635	132.32	3.00762
0.499118	124.121	126.09	3.06599		0.666	116.336	117.007	2.23287		0.666	124.575	125.157	3.11085		0.666	130.512	131.729	3.505		0.831894	131.517	132.216	3.0148
0.500482	123.917	125.633	3.0766		0.668	116.456	116.871	2.24706		0.668	124.816	125.099	3.11903		0.668	130.421	131.565	3.50895		0.834788	131.618	132.267	3.03881
0.502126	123.652	125.209	3.09089		0.67	116.406	116.716	2.28141		0.67	124.733	125.168	3.14308		0.67	130.259	131.754	3.50961		0.836895	131.482	132.18	3.04976
0.504	123.035	124.758	3.10528		0.672	116.501	116.995	2.27176		0.672	124.662	125.293	3.14475		0.672	130.419	131.756	3.5412		0.839248	131.385	132.1	3.05946
0.505113	122.399	124.15	3.08709		0.674	116.567	117.043	2.27544		0.674	124.738	125.473	3.16023		0.674	130.393	131.757	3.53856		0.841886	131.267	131.972	3.05251
0.506476	122.119	123.699	3.08349		0.676	116.615	117.032	2.28253		0.676	124.886	125.567	3.15918		0.676	130.243	131.597	3.56155		0.844785	131.298	132.066	3.05646
0.508121	121.798	123.266	3.10599		0.678	116.689	117.073	2.32248		0.678	124.903	125.768	3.17256		0.678	129.899	131.607	3.58561		0.846888	131.147	131.758	3.07271
0.51	121.423	122.866	3.12236		0.68	116.677	117.222	2.28942		0.68	124.977	125.864	3.18832		0.68	130.037	131.654	3.57035		0.849239	131.042	131.553	3.07939
0.511109	120.959	122.377	3.12879		0.682	116.794	117.186	2.29114		0.682	125.051	126.067	3.16725		0.682	129.934	131.449	3.58385		0.851879	130.997	131.567	3.11047
0.512469	120.618	121.908	3.13391		0.684	116.822	117.259	2.30461		0.684	125.04	126.285	3.20058		0.684	129.821	131.325	3.60119		0.854782	131.006	131.467	3.10619
0.514117	120.27	121.474	3.14565		0.686	116.774	117.48	2.29287		0.686	125.17	126.458	3.1847		0.686	129.716	131.329	3.60699		0.856881	130.691	131.273	3.0958
0.516	119.972	121.165	3.15749		0.688	116.906	117.385	2.29784		0.688	125.253	126.409	3.20636		0.688	129.491	131.131	3.60497		0.85923	130.517	131.375	3.12215
0.517104	119.537	120.659	3.15853		0.69	117.079	117.599	2.32332		0.69	125.157	126.469	3.18419		0.69	129.513	130.952	3.61574		0.861872	130.481	131.157	3.1192
0.518463	119.107	120.203	3.17194		0.692	117.088	117.737	2.32821		0.692	125.261	126.763	3.23251		0.692	129.401	130.868	3.6454		0.86478	130.572	131.179	3.13077
0.520112	118.763	119.845	3.16861		0.694	117.232	117.91	2.33387		0.694	125.297	126.591	3.20794		0.694	129.389	130.728	3.66061		0.866873	130.255	130.948	3.14231
0.522	118.473	119.592	3.1603		0.696	117.347	117.795	2.35398		0.696	125.287	126.63	3.23806		0.696	129.436	130.548	3.66954		0.869221	130.106	130.801	3.14786
0.5231	118.028	119.176	3.18509		0.698	117.265	118.09	2.34843		0.698	125.324	126.734	3.24665		0.698	129.27	130.352	3.65727		0.871865	130.034	130.73	3.15403
0.524457	117.725	118.753	3.20242		0.7	117.275	118.148	2.37809		0.7	125.319	126.709	3.24199		0.7	129.188	130.349	3.6645		0.874777	130.003	130.603	3.14175
0.526108	117.217	118.461	3.19753		0.702	117.261	118.182	2.36798		0.702	125.342	126.655	3.25692		0.702	129.158	130.164	3.68775		0.876866	129.703	130.413	3.16873
0.528	116.807	118.323	3.20885		0.704	117.391	118.38	2.36023		0.704	125.349	126.685	3.23395		0.704	128.953	130.057	3.6935		0.879212	129.575	130.312	3.18346
0.529095	116.704	117.898	3.20903		0.706	117.36	118.407	2.36865		0.706	125.177	126.621	3.28533		0.706	128.989	129.966	3.70859		0.881857	129.383	130.139	3.17533
0.530451	116.377	117.536	3.2024		0.708	117.393	118.465	2.37739		0.708	125.185	126.558	3.28618		0.708	128.788	129.794	3.71852		0.884775	129.354	130.136	3.18959
0.532103	115.758	117.438	3.22656		0.71	117.485	118.458	2.37964		0.71	125.091	126.536	3.28562		0.71	128.691	129.758	3.72657		0.886859	129.112	129.837	3.19965
0.534	115.615	117.315	3.25834		0.712	117.43	118.547	2.40552		0.712	125.038	126.456	3.29111		0.712	128.779	129.694	3.72164		0.889203	129.04	129.782	3.19378
0.535091	115.362	116.88	3.26242		0.714	117.361	118.572	2.40865		0.714	125.082	126.456	3.2964		0.714	128.534	129.623	3.72634		0.89185	128.812	129.589	3.1973
0.536445	114.794	116.673	3.27043		0.716	117.371	118.602	2.41369		0.716	124.93	126.313	3.28372		0.716	128.442	129.484	3.74417		0.894772	128.788	129.484	3.22121
0.538098	114.456	116.484	3.28049		0.718	117.366	118.614	2.40217		0.718	124.871	126.167	3.30644		0.718	128.359	129.606	3.73508		0.896852	128.558	129.258	3.21434
0.54	114.389	116.268	3.27597		0.72	117.407	118.571	2.4052		0.72	124.81	126.034	3.30342		0.72	128.392	129.425	3.74167		0.899194	128.336	129.011	3.21939
0.541086	113.968	116.067	3.26991		0.722	117.34	118.379	2.41438		0.722	124.762	125.894	3.32645		0.722	128.28	129.506	3.76643		0.901843	128.177	129.102	3.22997
0.542438	113.619	115.826	3.26729		0.724	117.333	118.639	2.41115		0.724	124.845	125.788	3.3232		0.724	128.115	129.232	3.77489		0.90477	128.171	128.84	3.24099
0.544094	113.378	115.552	3.2625		0.726	117.438	118.549	2.40623		0.726	124.748	125.798	3.32707		0.726	128.118	129.389	3.78126		0.906844	127.751	128.618	3.24852
0.546	113.114	115.457	3.27761		0.728	117.325	118.323	2.41418		0.728	124.504	125.603	3.33002		0.728	127.98	129.228	3.79378		0.909185	127.69	128.401	3.2538
0.547081	112.764	115.147	3.299		0.73	117.125	118.27	2.41765		0.73	124.493	125.481	3.34241		0.73	127.983	129.147	3.79338		0.911836	127.587	128.282	3.27822
0.548432	112.429	114.914	3.30463		0.732	117.16	118.24	2.4238		0.732	124.57	125.443	3.34956		0.732	127.879	129.142	3.80233		0.914767	127.561	128.188	3.26745
0.550089	112.095	114.77	3.30129		0.734	117.173	118.171	2.44887		0.734	124.327	125.396	3.35415		0.734	127.62	128.947	3.81637		0.916837	127.276	128.002	3.26157
0.552	111.863	114.575	3.30659		0.736	117.167	118.125	2.45048		0.736	124.285	125.303	3.35009		0.736	127.542	128.942	3.82841		0.919176	127.067	127.776	3.27545
0.553077	111.412	114.211	3.30952		0.738	117.214	118.016	2.45706		0.738	124.362	125.288	3.36073		0.738	127.401	128.889	3.80852		0.921828	126.864	127.626	3.27826
0.554426	111.05	113.91	3.31422		0.74	117.091	117.928	2.45249		0.74	124.299	125.121	3.37309		0.74	127.162	128.893	3.83081		0.924765	126.858	127.597	3.3026
0.556085	110.781	113.648	3.32606		0.742	117.133	117.902	2.45942		0.742	124.199	125.041	3.39452		0.742	127.076	128.675	3.83022		0.92683	126.651	127.336	3.30172
0.558	110.507	113.409	3.33267		0.744	117.05	117.697	2.45466		0.744	124.132	124.927	3.36653		0.744	127	128.61	3.8246		0.929167	126.389	127.245	3.30588
0.559072	110.075	112.965	3.33125		0.746	117.057	117.763	2.48056		0.746	124.144	124.971	3.39007		0.746	126.705	128.424	3.83312		0.931821	126.125	127.128	3.32108
0.56042	109.67	112.656	3.3429		0.748	117.036	117.649	2.50421		0.748	124.048	124.991	3.39954		0.748	126.553	128.29	3.86044		0.934762	126.252	127.01	3.29061
0.56208	109.341	112.45	3.34745		0.75	117.06	117.653	2.46604		0.75	123.941	124.836	3.39312		0.75	126.4	128.064	3.87863		0.936823	125.956	126.814	3.30794
0.564	109.152	112.167	3.35314		0.752	117.105	117.66	2.46804		0.752	123.838	124.597	3.39289		0.752	126.183	127.714	3.85484		0.939158	125.768	126.619	3.30988
0.565068	108.78	111.688	3.35884		0.754	116.905	117.486	2.46605		0.754	123.934	124.825	3.3909		0.754	125.933	127.595	3.88329		0.941814	125.635	126.458	3.32085
0.566413	108.347	111.339	3.34963		0.756	116.87	117.504	2.47587		0.756	123.738	124.591	3.42328		0.756	125.805	127.469	3.87512		0.94476	125.665	126.435	3.32867
0.568076	107.853	110.934	3.37878		0.758	116.958	117.542	2.45342		0.758	123.758	124.672	3.42582		0.758	125.524	127.18	3.87963		0.946815	125.441	126.114	3.33062
0.57	107.501	110.521	3.41955		0.76	116.949	117.43	2.49334		0.76	123.633	124.541	3.41622		0.76	125.316	127.039	3.87532		0.949149	125.112	126.114	3.34333
0.571063	107.128	110.066	3.38074		0.762	116.855	117.402	2.48157		0.762	123.584	124.551	3.4209		0.762	125.065	126.749	3.88864		0.951807	125.04	125.921	3.34126
0.572407	106.697	109.584	3.34953		0.764	116.705	117.224	2.48863		0.764	123.32	124.377	3.42622		0.764	124.858	126.412	3.87698		0.954757	124.986	125.84	3.34038
0.574071	106.33	109.092	3.36892		0.766	116.678	117.25	2.50973		0.766	123.343	124.362	3.42324		0.766	124.669	126.248	3.90195		0.956808	124.828	125.595	3.34451
0.576	106.026	108.756	3.37886		0.768	116.854	117.297	2.50437		0.768	123.198	124.312	3.43332		0.768	124.403	125.996	3.89738		0.95914	124.568	125.419	3.34365
0.577059	105.439	108.235	3.37481		0.77	116.757	117.292	2.50839		0.77	123.091	124.199	3.43158		0.77	124.064	125.783	3.91274		0.961799	124.518	125.362	3.36013
0.578401	105.074	107.723	3.37952		0.772	116.664	117.123	2.51371		0.772	122.976	124.095	3.43772		0.772	123.959	125.448	3.91915		0.964754	124.374	125.224	3.37666
0.580067	104.84	107.324	3.40176		0.774	116.603	117.113	2.4986		0.774	122.91	123.956	3.44504		0.774	123.68	125.291	3.91957		0.966801	124.147	125.069	3.35797
0.582	104.479	107.015	3.41559		0.776	116.529	117.104	2.5166		0.776	122.736	123.981	3.45897		0.776	123.436	125.08	3.93314		0.969131	124.047	124.769	3.3696
0.583054	103.997	106.513	3.39497		0.778	116.57	117.123	2.5131		0.778	122.769	123.811	3.44822		0.778	123.269	124.736	3.94634		0.971792	123.875	124.718	3.36794
0.584395	103.594	106.007	3.40129		0.78	116.479	117.117	2.51794		0.78	122.488	123.67	3.44909		0.78	123.066	124.452	3.91683		0.974752	123.876	124.639	3.36395
0.586062	103.219	105.623	3.42607		0.782	116.374	117.068	2.53778		0.782	122.294	123.55	3.44918		0.782	122.935	124.202	3.93961		0.976794	123.628	124.512	3.36028
0.588	102.947	105.263	3.42236		0.784	116.291	117.11	2.53464		0.784	122.274	123.312	3.45882		0.784	122.658	124.088	3.9446		0.979123	123.372	124.305	3.36838
0.58905	102.509	104.657	3.41214		0.786	116.206	117.09	2.53694		0.786	121.93	123.347	3.4598		0.786	122.421	123.853	3.94857		0.981785	123.273	124.146	3.36762
0.590389	102.129	104.235	3.4187		0.788	116.132	116.872	2.52891		0.788	122.043	122.983	3.46242		0.788	122.207	123.508	3.92763		0.984749	123.183	124.145	3.38678
0.592058	101.838	103.877	3.42561		0.79	115.858	116.861	2.52189		0.79	121.766	123.051	3.46142		0.79	122.022	123.402	3.96352		0.986786	122.995	123.863	3.38288
0.594	101.551	103.542	3.42943		0.792	115.892	116.803	2.53884		0.792	121.854	122.908	3.47548		0.792	122.062	123.186	3.94569		0.989114	122.816	123.74	3.3962
0.595045	101.113	103.14	3.42673		0.794	115.762	116.689	2.54483		0.794	121.834	123	3.45304		0.794	121.775	122.914	3.95871		0.991778	122.79	123.606	3.38131
0.596382	100.767	102.694	3.42367		0.796	115.633	116.567	2.52893		0.796	121.402	122.664	3.46491		0.796	121.376	122.751	3.97204		0.994747	122.663	123.494	3.38613
0.598053	100.424	102.399	3.41917		0.798	115.46	116.373	2.54327		0.798	121.332	122.427	3.47475		0.798	121.172	122.521	3.97364		0.996779	122.387	123.331	3.39643
0.6	100.138	102.247	3.42665		0.8	115.399	116.389	2.53405		0.8	121.097	122.361	3.47427		0.8	120.923	122.312	3.96755		0.999105	122.281	123.121	3.39562
0.601041	99.7551	101.729	3.43628		0.802	115.383	116.261	2.54217		0.802	120.969	122.18	3.48606		0.802	120.769	122.041	3.9759		1.00177	122.1	123.094	3.38506
0.602376	99.3303	101.39	3.43126		0.804	115.061	116.084	2.54095		0.804	120.919	122.025	3.49016		0.804	120.557	121.786	3.9668		1.00474	122.112	122.966	3.40024
0.604049	99.0147	101.258	3.42958		0.806	114.973	115.896	2.54496		0.806	120.776	122.061	3.49643		0.806	120.462	121.591	3.96123		1.00677	121.84	122.724	3.40887
0.606	99.001	100.989	3.45146		0.808	115.095	115.846	2.52941		0.808	120.472	121.76	3.48399		0.808	120.275	121.471	3.97983		1.0091	121.511	122.61	3.41511
0.607036	98.7747	100.609	3.45172		0.81	114.724	115.684	2.54844		0.81	120.475	121.561	3.50369		0.81	119.985	121.255	3.98417		1.01176	121.506	122.374	3.41665
0.60837	98.3837	100.381	3.42999		0.812	114.614	115.501	2.55122		0.812	120.317	121.437	3.49324		0.812	119.835	121.088	3.98086		1.01474	121.457	122.271	3.41607
0.610044	98.2037	100.134	3.43832		0.814	114.501	115.458	2.52307		0.814	120.156	121.103	3.48789		0.814	119.535	120.789	3.973		1.01676	121.241	122.173	3.41435
0.612	98.1375	100.016	3.44968		0.816	114.451	115.276	2.55814		0.816	120.072	121.091	3.49206		0.816	119.407	120.673	3.97623		1.01909	121.146	121.939	3.42091
0.613032	97.7871	99.7983	3.43137		0.818	114.245	115.082	2.5575		0.818	119.918	121.045	3.48877		0.818	119.119	120.365	3.98076		1.02176	121.002	121.746	3.41134
0.614364	97.6352	99.4435	3.44677		0.82	114.193	114.903	2.561		0.82	119.834	120.786	3.50957		0.82	118.941	120.202	3.9807		1.02474	120.948	121.662	3.4243
0.61604	97.5253	99.2042	3.4644		0.822	114.197	114.792	2.54061		0.822	119.7	120.671	3.49309		0.822	118.713	119.893	3.97451		1.02676	120.796	121.436	3.41825
0.618	97.2812	99.2435	3.4493		0.824	114.082	114.748	2.54014		0.824	119.715	120.491	3.50436		0.824	118.482	119.706	3.98383		1.02908	120.581	121.32	3.42861
0.619027	97.0804	99.0188	3.44321		0.826	113.918	114.509	2.55266		0.826	119.539	120.238	3.47952		0.826	118.349	119.445	3.98384		1.03175	120.548	121.187	3.42858
0.620358	97.0368	98.7562	3.43845		0.828	113.995	114.308	2.54905		0.828	119.511	120.144	3.49075		0.828	118.22	119.273	3.98599		1.03474	120.53	121.125	3.42938
0.622035	96.9452	98.7459	3.43395		0.83	113.912	114.267	2.56021		0.83	119.504	119.921	3.479		0.83	118.054	118.967	3.99071		1.03675	120.314	120.959	3.4213
0.624	96.962	98.7647	3.4546		0.832	113.943	114.158	2.54401		0.832	119.469	119.752	3.46532		0.832	118.006	118.765	3.99085		1.03907	120.199	120.82	3.41741
0.625023	96.8279	98.456	3.45911		0.834	113.874	114.052	2.5368		0.834	119.446	119.752	3.50678		0.834	117.802	118.62	3.99362		1.04174	120.379	120.657	3.42973
0.626351	96.6648	98.2802	3.45095		0.836	113.811	113.827	2.55443		0.836	119.423	119.639	3.4845		0.836	117.836	118.54	3.99531		1.04473	120.328	120.615	3.44046
0.628031	96.7129	98.2644	3.45153		0.838	113.872	113.901	2.53268		0.838	119.333	119.515	3.50379		0.838	117.73	118.358	3.9953		1.04674	120.087	120.408	3.40762
0.63	96.879	98.2043	3.45526		0.84	113.808	113.927	2.5738		0.84	119.38	119.431	3.50086		0.84	117.734	118.086	3.98611		1.04906	120.106	120.411	3.41845
0.631018	96.7479	98.0466	3.44944		0.842	113.894	113.793	2.56324		0.842	119.269	119.333	3.50194		0.842	117.579	117.995	3.9971		1.05173	120.061	120.368	3.41337
0.632345	96.7047	98.0914	3.44475		0.844	113.846	113.617	2.56833		0.844	119.344	119.326	3.49279		0.844	117.532	117.866	4.00327		1.05473	120.145	120.41	3.43156
0.634026	96.7991	98.1191	3.4518		0.846	113.884	113.734	2.5592		0.846	119.304	119.393	3.48746		0.846	117.677	117.805	4.00513		1.05674	120.046	120.348	3.43488
0.636	96.9332	98.0977	3.46257		0.848	113.74	113.674	2.56541		0.848	119.349	119.436	3.49856		0.848	117.498	117.775	3.99848		1.05905	120.114	120.305	3.43283
0.637014	96.9604	98.0007	3.4532		0.85	113.924	113.878	2.54655		0.85	119.374	119.365	3.49974		0.85	117.521	117.825	4.01109		1.06173	120.144	120.375	3.41825
0.638339	96.973	97.9926	3.44623		0.852	113.93	113.802	2.54865		0.852	119.341	119.403	3.50922		0.852	117.448	117.709	3.99751		1.06473	120.119	120.354	3.43458
0.640021	97.0521	98.0507	3.46021		0.854	113.959	113.852	2.55738		0.854	119.361	119.379	3.50554		0.854	117.482	117.904	3.99327		1.06673	120.127	120.371	3.44099
0.642	97.3254	98.2576	3.45955		0.856	114	113.946	2.56565		0.856	119.393	119.432	3.48372		0.856	117.476	118.007	4.00143		1.06904	120.225	120.296	3.41615
0.643009	97.43	98.2563	3.44874		0.858	113.89	113.915	2.5713		0.858	119.488	119.576	3.51527		0.858	117.519	117.99	4.00291		1.07172	120.128	120.326	3.43069
0.644333	97.51	98.1461	3.47829		0.86	113.96	114.011	2.55058		0.86	119.409	119.632	3.49776		0.86	117.44	118.015	3.99474		1.07473	120.183	120.531	3.42721
0.646017	97.6502	98.247	3.47798		0.862	114.039	114.005	2.56438		0.862	119.444	119.752	3.49206		0.862	117.555	118.101	4.00659		1.07672	120.389	120.498	3.44134
0.648	97.7824	98.5415	3.45222		0.864	114.044	114.157	2.54874		0.864	119.481	119.887	3.50463		0.864	117.654	118.214	3.99681		1.07903	120.234	120.68	3.42967
0.649004	97.8044	98.6257	3.45792		0.866	114.083	114.169	2.56138		0.866	119.545	119.998	3.51587		0.866	117.433	118.235	3.99705		1.08171	120.128	120.501	3.4382
0.650327	98.0316	98.8513	3.44197		0.868	114.064	114.242	2.57426		0.868	119.549	119.972	3.49601		0.868	117.671	118.274	3.99343		1.08472	120.561	120.802	3.42969
0.652012	98.2495	99.0901	3.43792		0.87	114.071	114.277	2.56759		0.87	119.576	120.085	3.50637		0.87	117.957	118.358	3.99933		1.08671	120.505	120.797	3.43452
0.654	98.4771	99.1769	3.47092		0.872	114.169	114.3	2.5616		0.872	119.812	120.173	3.51633		0.872	118.131	118.506	4.01064		1.08902	120.338	120.746	3.42221
0.655	98.6819	99.2532	3.46384		0.874	114.317	114.319	2.58116		0.874	119.799	120.241	3.49941		0.874	117.81	118.462	4.001		1.09171	120.488	120.808	3.43494
0.65632	98.8573	99.5123	3.46627		0.876	114.294	114.62	2.56773		0.876	119.726	120.458	3.50281		0.876	117.521	118.541	3.98925		1.09472	120.78	120.946	3.42376
0.658008	99.0804	99.6723	3.46929		0.878	114.339	114.652	2.5621		0.878	119.685	120.528	3.51797		0.878	117.955	118.65	3.99887		1.09671	120.663	120.933	3.43808
0.66	99.3965	99.8645	3.45792		0.88	114.189	114.801	2.59538		0.88	120.091	120.399	3.50396		0.88	118.391	118.704	4.00339		1.09902	120.469	120.9	3.44001
0.660995	99.4518	100.077	3.48131		0.882	114.51	114.745	2.57883		0.882	120.124	120.648	3.48768		0.882	118.098	118.587	4.00607		1.1017	120.883	121.099	3.43405
0.662314	99.6804	100.347	3.4813		0.884	114.557	114.867	2.54839		0.884	119.994	120.773	3.50876		0.884	117.757	118.628	3.99096		1.10472	120.999	121.109	3.43837
0.664003	100.029	100.566	3.45285		0.886	114.517	114.789	2.5801		0.886	120.299	120.784	3.51198		0.886	118.12	118.614	4.0049		1.1067	120.867	121.099	3.43716
0.666	100.186	100.839	3.46377		0.888	114.608	114.922	2.56875		0.888	120.336	120.92	3.49859		0.888	118.962	118.747	4.01747		1.10901	120.903	121.018	3.42436
0.666991	100.262	101.02	3.46553		0.89	114.736	115.017	2.56754		0.89	120.389	120.956	3.5157		0.89	118.842	118.79	3.9971		1.11169	121.065	121.086	3.42943
0.668308	100.636	101.242	3.45274		0.892	114.79	115.202	2.54624		0.892	120.304	120.958	3.50242		0.892	118.321	118.831	4.00306		1.11472	121.03	121.216	3.4409
0.669999	100.86	101.474	3.4592		0.894	114.829	115.186	2.56095		0.894	120.532	121.052	3.50005		0.894	118.298	118.796	4.00728		1.11669	120.68	121.202	3.4373
0.672	100.871	101.801	3.4679		0.896	114.628	115.257	2.5598		0.896	119.97	120.985	3.49247		0.896	118.975	118.92	4.0069		1.119	120.236	121.215	3.43924
0.672986	100.858	101.976	3.46047		0.898	114.472	115.31	2.55056		0.898	120.744	121.159	3.51094		0.898	119.295	118.752	4.01776		1.12168	120.409	121.305	3.41744
0.674302	100.991	102.083	3.46244		0.9	114.661	115.411	2.5719		0.9	120.9	121.262	3.51976		0.9	118.742	118.99	4.01051		1.12471	120.961	121.564	3.41267
0.675994	101.242	102.353	3.47196		0.902	113.525	115.614	2.55607		0.902	119.401	121.194	3.50692		0.902	118.607	119.008	3.99747		1.12668	121.043	121.543	3.43452
0.678	100.929	102.734	3.46646		0.904	113.329	115.662	2.55993		0.904	118.4	121.566	3.51337		0.904	118.654	119.116	4.00618		1.12899	120.756	121.697	3.4354
0.678982	100.235	102.823	3.45841		0.906	114.548	115.667	2.58327		0.906	119.774	121.557	3.51091		0.906	118.566	119.301	4.00369		1.13168	120.725	121.864	3.4453
0.680296	100.606	103.048	3.47151		0.908	115.211	115.923	2.55912		0.908	120.536	121.714	3.51205		0.908	118.456	119.233	3.9881		1.13471	120.664	122.047	3.45102
0.68199	100.662	103.312	3.46591		0.91	114.458	116.072	2.56167		0.91	120.23	121.956	3.51354		0.91	117.656	119.21	4.00632		1.13668	120.122	121.925	3.43136
0.684	101.63	103.501	3.45367		0.912	113.342	116.306	2.55536		0.912	119.68	121.976	3.48913		0.912	116.608	119.312	4.00655		1.13898	120.116	122.076	3.42541
0.684977	102.827	103.623	3.46886		0.914	113.721	116.394	2.55054		0.914	119.066	122.479	3.50127		0.914	117.944	119.466	4.00012		1.14167	120.534	122.205	3.43738
0.686289	100.742	103.676	3.47807		0.916	114.14	116.274	2.57703		0.916	119.453	122.512	3.50807		0.916	116.789	119.447	3.98593		1.14471	120.031	122.274	3.43437
0.687985	100.408	103.671	3.46222		0.918	113.677	116.728	2.55092		0.918	119.106	122.722	3.50167		0.918	113.092	119.413	4.02057		1.14667	119.669	122.341	3.43245
0.69	101.215	103.877	3.45126		0.92	112.965	116.555	2.5832		0.92	118.19	122.691	3.5066		0.92	113.479	119.868	4.00826		1.14897	119.636	122.416	3.44516
0.690973	99.5203	104.005	3.44668		0.922	112.972	116.973	2.55487		0.922	117.312	123.054	3.51443		0.922	115.608	119.826	4.00321		1.15166	119.209	122.468	3.42421
0.692283	103.474	104.149	3.45518		0.924	112.945	116.868	2.55179		0.924	117.166	123.174	3.51755		0.924	112.412	119.873	4.01106		1.15471	119.118	122.592	3.43932
0.693981	107.88	104.3	3.45731		0.926	112.43	117.158	2.55656		0.926	117.386	123.242	3.50201		0.926	106.526	120.04	3.99753		1.15666	118.887	122.566	3.45059
0.696	104.306	104.758	3.45144		0.928	111.761	117.199	2.55181		0.928	116.389	123.313	3.47565		0.928	107.027	120.258	3.99928		1.15896	118.344	122.647	3.44015
0.696968	100.88	105.297	3.45335		0.93	111.292	117.1	2.57411		0.93	115.273	123.63	3.49443		0.93	107.832	120.364	4.00004		1.16165	117.913	122.661	3.43204
0.698277	100.877	105.642	3.44969		0.932	110.982	117.287	2.57935		0.932	114.791	123.748	3.51057		0.932	104.107	120.549	3.98533		1.1647	117.76	122.806	3.44342
0.699976	101.846	106.164	3.43438		0.934	110.613	117.379	2.56188		0.934	113.823	123.945	3.51095		0.934	100.611	120.857	3.99453		1.16666	117.12	122.787	3.43352
0.702	102.479	106.898	3.43477		0.936	109.844	117.639	2.56775		0.936	113.417	124.121	3.50676		0.936	99.5625	120.78	4.00067		1.16895	116.562	122.734	3.42388
0.702964	98.6179	107.164	3.44158		0.938	109.36	117.692	2.56356		0.938	112.171	124.222	3.51032		0.938	99.6089	121	3.98285		1.17165	116.11	122.784	3.43244
0.704271	92.5037	107.569	3.44208		0.94	108.897	117.765	2.55472		0.94	110.519	124.39	3.49681		0.94	97.331	120.92	3.99083		1.1747	115.641	122.804	3.43924
0.705972	89.4429	108.04	3.43826		0.942	108.21	117.807	2.564		0.942	108.891	124.371	3.50782		0.942	95.417	121.068	3.97555		1.17665	114.782	122.693	3.43243
0.708	87.937	108.388	3.44351		0.944	107.561	117.916	2.56805		0.944	107.616	124.547	3.49895		0.944	94.2907	121.211	3.97627		1.17894	113.792	122.583	3.44492
0.708959	86.2689	108.854	3.44866		0.946	106.71	118.069	2.5578		0.946	106.245	124.535	3.50666		0.946	93.456	121.157	3.98113		1.18164	112.96	122.57	3.43844
0.710265	85.778	109.389	3.44476		0.948	105.881	118.169	2.54845		0.948	104.433	124.712	3.51406		0.948	91.7992	121.349	3.98478		1.1847	111.658	122.57	3.44223
0.711967	83.3255	109.836	3.43196		0.95	104.853	118.28	2.54916		0.95	103.009	124.792	3.4896		0.95	89.7519	121.409	3.96599		1.18664	110.259	122.442	3.42816
0.714	79.2947	110.418	3.4356		0.952	103.775	118.256	2.56695		0.952	101.779	124.742	3.50864		0.952	88.0371	121.397	3.97306		1.18893	108.783	122.31	3.41494
0.714955	77.3436	110.748	3.43023		0.954	102.549	118.299	2.56738		0.954	100.448	124.817	3.48778		0.954	86.6132	121.514	3.97333		1.19163	107.342	122.191	3.44223
0.716258	75.4309	111.127	3.40476		0.956	101.308	118.269	2.57053		0.956	99.1919	124.907	3.4779		0.956	85.1744	121.414	3.98178		1.1947	105.772	122.149	3.422
0.717963	74.0982	111.643	3.42444		0.958	99.9729	118.327	2.5474		0.958	97.9411	124.824	3.49394		0.958	83.4888	121.43	3.90969		1.19663	104.382	121.952	3.41955
0.72	73.3193	112.084	3.45142		0.96	98.5966	118.341	2.55734		0.96	96.972	124.865	3.47994		0.96	81.8918	121.436	3.96141		1.19893	102.957	121.711	3.42662
0.72095	69.7707	112.275	3.41516		0.962	96.9996	118.315	2.54724		0.962	95.8789	124.925	3.47684		0.962	80.24	121.584	3.94148		1.20163	101.768	121.556	3.41068
0.722252	67.24	112.622	3.40624		0.964	95.6355	118.23	2.57045		0.964	94.5872	124.732	3.4822		0.964	78.9788	121.447	3.94128		1.20469	100.688	121.693	3.43225
0.723958	66.5982	113.12	3.41009		0.966	94.2404	118.301	2.5632		0.966	93.5367	124.761	3.47721		0.966	77.431	121.394	3.94699		1.20663	99.4206	121.291	3.42984
0.726	65.1246	113.505	3.38826		0.968	92.9918	118.272	2.52904		0.968	92.3806	124.666	3.47796		0.968	75.7322	121.36	3.92608		1.20892	98.3403	121.083	3.40522
0.726946	63.9942	113.619	3.39802		0.97	91.6819	118.03	2.5571		0.97	91.1531	124.663	3.47994		0.97	74.1939	121.325	3.94147		1.21162	97.3345	120.93	3.39605
0.728246	62.7418	113.968	3.40484		0.972	90.6447	117.924	2.54814		0.972	89.8376	124.501	3.4792		0.972	72.6267	121.319	3.9182		1.21469	96.2726	120.738	3.40797
0.729954	61.0483	114.327	3.38437		0.974	89.6053	117.883	2.54486		0.974	88.7086	124.351	3.49834		0.974	71.1641	121.349	3.9247		1.21662	94.9236	120.536	3.39992
0.732	60.0752	114.653	3.38106		0.976	88.5875	117.828	2.53854		0.976	87.3987	124.242	3.46111		0.976	69.3829	121.118	3.91761		1.21891	93.8072	120.326	3.40338
0.732941	58.8751	114.941	3.37918		0.978	87.5309	117.662	2.54193		0.978	86.1574	124.295	3.46289		0.978	67.7029	120.983	3.92651		1.22161	92.5839	120.057	3.40361
0.73424	57.7175	115.167	3.38568		0.98	86.5313	117.57	2.55637		0.98	84.7158	123.936	3.48399		0.98	66.1181	120.906	3.91767		1.22469	91.4111	119.922	3.40477
0.735949	56.912	115.407	3.38722		0.982	85.4067	117.379	2.52794		0.982	83.7074	123.604	3.47247		0.982	64.6062	120.692	3.90777		1.22661	90.1664	119.638	3.3907
0.738	55.6753	115.906	3.38058		0.984	84.2694	117.234	2.53885		0.984	82.3908	123.631	3.4388		0.984	62.9368	120.561	3.90301		1.2289	88.9179	119.4	3.39938
0.738936	54.0295	116.142	3.37662		0.986	83.2294	117.109	2.53309		0.986	81.2208	123.427	3.4473		0.986	61.3541	120.382	3.8779		1.2316	87.6578	119.133	3.38643
0.740233	52.6107	116.274	3.36616		0.988	82.1098	116.992	2.51663		0.988	79.948	123.186	3.44846		0.988	59.7809	120.27	3.88952		1.23469	86.5053	118.987	3.39248
0.741944	51.4053	116.543	3.37228		0.99	80.9376	116.656	2.53368		0.99	78.7929	122.809	3.45783		0.99	58.1634	120.112	3.88738		1.23661	85.4199	118.786	3.386
0.744	50.2868	116.852	3.388		0.992	79.8805	116.515	2.52302		0.992	77.717	122.853	3.44356		0.992	56.5	119.743	3.8799		1.23889	83.8438	118.466	3.37697
0.744932	49.1733	116.904	3.36595		0.994	78.8383	116.276	2.51945		0.994	76.4254	122.619	3.44676		0.994	54.9456	119.547	3.87961		1.2416	82.7249	118.27	3.3517
0.746227	47.9768	117.047	3.35479		0.996	77.7568	116.087	2.51606		0.996	75.1403	122.357	3.46039		0.996	53.3542	119.345	3.89154		1.24468	81.7211	118.213	3.36246
0.74794	46.5813	117.225	3.3625		0.998	76.6051	115.814	2.51197		0.998	73.9095	122.264	3.41788		0.998	51.7721	119.075	3.87112		1.2466	80.4184	117.748	3.3714
0.75	45.3204	117.399	3.34575		1	75.7532	115.581	2.49798		1	72.6621	121.849	3.42326		1	50.3128	118.804	3.86777		1.24888	79.2109	117.544	3.3657
0.750927	44.2314	117.448	3.32767		1.002	74.4417	115.334	2.48852		1.002	71.4816	121.636	3.42003		1.002	48.6129	118.604	3.88043		1.25159	78.0679	117.383	3.35673
0.752221	43.1307	117.501	3.33618		1.004	73.446	115.151	2.50313		1.004	70.3742	121.53	3.40916		1.004	47.2953	118.458	3.84659		1.25468	76.9763	117.013	3.34979
0.753935	41.9883	117.521	3.33509		1.006	72.3562	114.985	2.49864		1.006	69.1661	121.148	3.4102		1.006	45.7386	118.116	3.8463		1.25659	75.7846	116.908	3.34645
0.756	40.8812	117.554	3.33098		1.008	71.3992	114.78	2.50071		1.008	67.9596	120.893	3.39523		1.008	44.3303	117.774	3.85631		1.25887	74.606	116.612	3.34478
0.756923	39.698	117.45	3.33514		1.01	70.1767	114.284	2.47541		1.01	66.8162	120.671	3.39746		1.01	42.8998	117.52	3.83793		1.26158	73.419	116.371	3.34412
0.758215	38.6009	117.536	3.3279		1.012	69.0869	114.103	2.4795		1.012	65.7015	120.481	3.38168		1.012	41.3276	117.143	3.82624		1.26468	72.2068	116.172	3.3338
0.759931	37.5784	117.609	3.31719		1.014	68.0326	114.016	2.4847		1.014	64.4563	120.126	3.37978		1.014	39.7135	116.821	3.8543		1.26658	71.091	115.854	3.32366
0.762	36.556	117.634	3.31239		1.016	67.0784	113.797	2.48768		1.016	63.2969	119.839	3.40712		1.016	38.2885	116.485	3.81796		1.26886	69.9464	115.641	3.32759
0.762918	35.5069	117.554	3.29778		1.018	65.9781	113.513	2.47939		1.018	62.1374	119.652	3.39094		1.018	36.8779	116.145	3.79068		1.27157	68.8642	115.356	3.33556
0.764209	34.3759	117.466	3.30321		1.02	64.911	113.094	2.46628		1.02	60.8596	119.232	3.38396		1.02	35.531	115.86	3.82783		1.27468	67.62	115.192	3.31888
0.765926	33.1037	117.468	3.30905		1.022	63.844	113.095	2.47289		1.022	59.8014	118.941	3.37399		1.022	34.1823	115.64	3.80145		1.27658	66.4296	114.985	3.32387
0.768	31.958	117.584	3.29682		1.024	62.7072	112.851	2.47469		1.024	58.5236	118.855	3.39063		1.024	32.8835	115.256	3.80508		1.27885	65.2059	114.726	3.33015
0.768914	30.9105	117.381	3.28951		1.026	61.8913	112.704	2.46353		1.026	57.1279	118.529	3.37333		1.026	31.4353	114.78	3.80769		1.28157	64.091	114.478	3.2951
0.770202	29.7224	117.272	3.28544		1.028	60.7622	112.413	2.44648		1.028	56.0995	118.218	3.36123		1.028	29.794	114.545	3.78329		1.28467	63.0123	114.178	3.29502
0.771922	28.42	117.272	3.28251		1.03	59.8661	112.181	2.45248		1.03	54.8024	118.091	3.3388		1.03	28.2501	114.261	3.7854		1.28657	61.6393	113.895	3.30171
0.774	27.2738	117.219	3.28322		1.032	58.7371	111.917	2.4714		1.032	53.607	117.695	3.36956		1.032	26.7383	113.978	3.77922		1.28884	60.5559	113.63	3.27712
0.774909	26.1536	117.005	3.2681		1.034	57.7707	111.86	2.45112		1.034	52.5388	117.375	3.34355		1.034	25.1385	113.503	3.77224		1.29156	59.5529	113.465	3.30104
0.776196	24.9955	116.85	3.26464		1.036	56.6051	111.313	2.43771		1.036	51.496	117.156	3.32845		1.036	23.8071	113.335	3.74602		1.29467	58.4796	113.313	3.32271
0.777917	23.9682	116.759	3.27078		1.038	55.5702	111.34	2.46095		1.038	50.1977	116.781	3.36312		1.038	22.3478	113.079	3.78347		1.29656	57.3789	113.018	3.28483
0.78	23.0005	116.728	3.25655		1.04	54.6928	111.138	2.44757		1.04	49.222	116.575	3.36362		1.04	20.9931	112.688	3.75988		1.29884	56.2562	112.772	3.28145
0.780905	21.8823	116.434	3.24797		1.042	53.7524	110.636	2.44244		1.042	48.3114	116.171	3.34912		1.042	19.7872	112.392	3.76468		1.30155	55.1522	112.551	3.27444
0.78219	20.8057	116.243	3.26812		1.044	52.7755	110.553	2.43475		1.044	47.2211	116.051	3.33466		1.044	18.6919	112.141	3.75592		1.30467	54.1144	112.385	3.27984
0.783913	19.7569	116.205	3.25734		1.046	51.4352	110.36	2.42504		1.046	46.0622	115.616	3.31835		1.046	17.2785	111.754	3.75194		1.30655	52.9214	112.247	3.26459
0.786	18.703	116.102	3.24168		1.048	50.3366	110.066	2.42566		1.048	44.9941	115.32	3.31575		1.048	16.0234	111.5	3.74478		1.30883	51.7827	111.956	3.2629
0.7869	17.7196	115.721	3.24606		1.05	49.6158	109.81	2.42976		1.05	43.8451	115.054	3.32167		1.05	14.7118	111.131	3.73202		1.31155	50.8019	111.674	3.26486
0.788184	16.7249	115.502	3.22034		1.052	48.5382	109.474	2.42183		1.052	42.725	114.663	3.31858		1.052	13.2703	110.968	3.71364		1.31467	49.6736	111.793	3.25062
0.789908	15.7046	115.436	3.22187		1.054	47.6266	109.39	2.41187		1.054	41.7796	114.467	3.31354		1.054	11.863	110.615	3.71664		1.31655	48.6139	111.495	3.25472
0.792	14.6969	115.285	3.25034		1.056	46.7144	109.045	2.42248		1.056	40.8641	114.028	3.29235		1.056	10.4928	110.38	3.69388		1.31882	47.559	111.292	3.25144
0.792896	13.6208	114.904	3.21832		1.058	45.6291	108.849	2.44272		1.058	39.7804	113.923	3.31926		1.058	9.17461	110	3.71046		1.32154	46.5979	111.172	3.21768
0.794178	12.6564	114.707	3.21049		1.06	44.7125	108.528	2.41722		1.06	38.7205	113.601	3.31231		1.06	7.95266	109.594	3.70553		1.32466	45.541	111.036	3.2388
0.795904	11.7351	114.504	3.22054		1.062	43.5387	108.364	2.42047		1.062	37.6142	113.3	3.29353		1.062	6.47459	109.373	3.7088		1.32654	44.5947	110.872	3.22714
0.798	10.6776	114.254	3.20308		1.064	42.5026	108.112	2.40358		1.064	36.4564	113.005	3.29458		1.064	5.17741	108.833	3.69223		1.32881	43.5699	110.819	3.21384
0.798891	9.54647	114	3.20786		1.066	41.4278	107.766	2.40166		1.066	35.3246	112.556	3.28717		1.066	3.76739	108.802	3.6805		1.33153	42.6412	110.597	3.21406
0.800171	8.4387	113.825	3.20187		1.068	40.4968	107.399	2.37471		1.068	34.2067	112.366	3.27181		1.068	2.61403	108.446	3.69061		1.33466	41.7082	110.553	3.21821
0.801899	7.42367	113.534	3.19081		1.07	39.4408	107.23	2.3751		1.07	33.0981	112.102	3.27177		1.07	1.19681	108.18	3.67549		1.33653	40.5902	110.375	3.20819
0.804	6.40047	113.402	3.20002		1.072	38.5518	107.055	2.40497		1.072	32.0316	111.798	3.26905		1.072	-0.0644149	107.777	3.64253		1.3388	39.5001	110.183	3.20598
0.804887	5.31988	113.166	3.18428		1.074	37.6275	106.725	2.36841		1.074	31.0082	111.521	3.28532		1.074	-1.34168	107.504	3.65089		1.34152	38.258	110.047	3.203
0.806165	4.36914	112.727	3.18644		1.076	36.8724	106.587	2.33747		1.076	29.9594	111.375	3.25928		1.076	-2.6018	107.272	3.64177		1.34466	37.0698	110.079	3.1954
0.807895	3.30475	112.422	3.18714		1.078	35.9469	106.212	2.36672		1.078	28.9742	111.085	3.28701		1.078	-3.66333	106.95	3.65173		1.34653	36.2376	109.986	3.19474
0.81	2.13554	112.34	3.17226		1.08	34.8423	106.049	2.3754		1.08	28.1312	110.817	3.25197		1.08	-4.70992	106.809	3.64013		1.34879	35.0333	109.667	3.1698
0.810882	1.20554	111.933	3.17568		1.082	34.0059	105.833	2.36824		1.082	27.0453	110.463	3.25532		1.082	-5.78528	106.508	3.64953		1.35152	34.1968	109.649	3.1671
0.812159	0.297803	111.701	3.16032		1.084	33.0008	105.717	2.35849		1.084	26.0894	110.112	3.24332		1.084	-6.82579	106.155	3.63534		1.35466	33.2866	109.571	3.17354
0.81389	-0.694468	111.7	3.15553		1.086	32.1113	105.544	2.34273		1.086	24.8498	109.952	3.23553		1.086	-8.17331	105.917	3.62676		1.35652	32.1679	109.303	3.17672
0.816	-1.73277	111.502	3.17716		1.088	31.1864	105.18	2.33127		1.088	23.8967	109.689	3.22794		1.088	-9.15518	105.65	3.62176		1.35878	31.1867	109.188	3.15173
0.816878	-2.83394	111.03	3.15419		1.09	30.2946	104.941	2.35212		1.09	22.8163	109.46	3.22663		1.09	-10.4103	105.448	3.6101		1.36151	30.2404	109.131	3.15776
0.818153	-3.68984	110.785	3.13656		1.092	29.3482	104.784	2.33926		1.092	21.8444	109.341	3.22836		1.092	-11.2932	105.131	3.61191		1.36465	29.3646	109.139	3.16697
0.819886	-4.46958	110.672	3.13753		1.094	28.4094	104.609	2.34269		1.094	20.7962	109.09	3.22159		1.094	-12.4034	104.77	3.60932		1.36651	28.2458	108.893	3.16238
0.822	-5.40802	110.563	3.13074		1.096	27.5891	104.422	2.32467		1.096	19.754	108.938	3.20164		1.096	-13.2647	104.599	3.60751		1.36877	27.4521	108.837	3.15641
0.822873	-6.27864	110.245	3.13389		1.098	26.6492	104.275	2.32838		1.098	18.771	108.684	3.21284		1.098	-14.189	104.425	3.59244		1.3715	26.3865	108.787	3.14722
0.824147	-7.11193	109.96	3.12355		1.1	25.6812	104.139	2.33542		1.1	17.8572	108.391	3.21524		1.1	-15.1095	104.221	3.58382		1.37465	25.472	108.726	3.13663
0.825881	-7.83884	109.752	3.10763		1.102	24.842	104.039	2.33312		1.102	16.9112	108.254	3.2012		1.102	-15.8546	103.804	3.59983		1.3765	24.6308	108.525	3.13494
0.828	-8.55887	109.58	3.11411		1.104	23.8972	103.878	2.31443		1.104	16.1468	108.105	3.20107		1.104	-16.8492	103.719	3.57401		1.37876	23.6924	108.444	3.13358
0.828868	-9.47572	109.165	3.10478		1.106	23.0304	103.717	2.3218		1.106	15.223	107.826	3.17814		1.106	-17.799	103.43	3.57333		1.38149	22.7146	108.403	3.13868
0.83014	-10.3304	108.843	3.09072		1.108	22.0214	103.655	2.30829		1.108	14.2759	107.772	3.18941		1.108	-18.6503	103.329	3.56409		1.38465	21.6346	108.407	3.12166
0.831877	-11.1964	108.677	3.08498		1.11	21.1292	103.459	2.32469		1.11	13.413	107.578	3.19045		1.11	-19.5907	103.02	3.57023		1.3865	20.7038	108.226	3.1396
0.834	-12.1268	108.545	3.09192		1.112	20.259	103.299	2.30502		1.112	12.3891	107.479	3.14958		1.112	-20.4929	102.914	3.57102		1.38876	19.5957	108.091	3.09857
0.834864	-12.7669	108.139	3.09307		1.114	19.3031	103.376	2.28151		1.114	11.6268	107.284	3.17127		1.114	-21.1855	102.647	3.5569		1.39149	18.6124	107.953	3.08223
0.836134	-13.4294	107.787	3.06719		1.116	18.4358	102.952	2.30416		1.116	10.5243	107.222	3.16054		1.116	-21.8233	102.381	3.5331		1.39465	17.5795	108.055	3.11908
0.837872	-14.3381	107.685	3.0686		1.118	17.5706	103.038	2.29748		1.118	9.4169	106.849	3.1566		1.118	-22.2332	102.4	3.53121		1.39649	16.6026	107.904	3.1006
0.84	-15.1598	107.472	3.0967		1.12	16.7099	102.984	2.31306		1.12	8.45771	106.958	3.15657		1.12	-22.4268	102.179	3.53451		1.39875	15.6204	107.793	3.10616
0.840859	-15.8834	106.924	3.08005		1.122	15.8984	102.936	2.30735		1.122	7.69876	106.823	3.14907		1.122	-22.7819	102.057	3.50405		1.40148	14.6177	107.71	3.08188
0.842128	-16.7273	106.826	3.06225		1.124	14.8125	102.843	2.27129		1.124	6.432	106.719	3.14282		1.124	-23.3395	101.787	3.51585		1.40464	13.5902	107.649	3.07249
0.843867	-17.5168	106.725	3.05799		1.126	14.3202	102.746	2.28045		1.126	5.44847	106.64	3.15762		1.126	-23.5818	101.702	3.51407		1.40648	12.6977	107.613	3.0934
0.846	-18.0551	106.269	3.05009		1.128	13.2869	102.669	2.2861		1.128	4.46438	106.407	3.10853		1.128	-23.9834	101.691	3.499		1.40874	11.7433	107.623	3.07209
0.846855	-18.5897	105.942	3.05294		1.13	12.4577	102.578	2.27158		1.13	3.60254	106.369	3.1321		1.13	-24.4674	101.495	3.50502		1.41147	10.8889	107.616	3.08122
0.848122	-19.3663	105.84	3.04621		1.132	11.7679	102.263	2.26346		1.132	2.50118	106.245	3.12429		1.132	-25.0593	101.417	3.50282		1.41464	9.9218	107.513	3.06767
0.849863	-20.0261	105.512	3.03083		1.134	11.0023	102.454	2.27504		1.134	1.71126	106.054	3.09012		1.134	-25.4222	101.317	3.47769		1.41647	8.87035	107.301	3.07032
0.852	-20.5875	105.289	3.03452		1.136	10.12	102.338	2.24267		1.136	0.651939	106.152	3.12993		1.136	-26.0141	101.181	3.47895		1.41873	7.90965	107.302	3.0605
0.85285	-21.2536	105.052	3.02827		1.138	9.46669	102.306	2.26197		1.138	-0.25747	105.941	3.12543		1.138	-26.3775	101.089	3.47382		1.42147	7.03395	107.264	3.05205
0.854116	-21.8169	104.713	3.01867		1.14	8.7365	102.314	2.26314		1.14	-1.14586	105.907	3.10841		1.14	-26.7697	101.003	3.4606		1.42464	6.12129	107.179	3.04951
0.855858	-22.3873	104.406	3.02069		1.142	8.00909	102.123	2.25685		1.142	-2.1222	105.739	3.11703		1.142	-27.0037	100.841	3.45686		1.42647	5.13821	107.094	3.05552
0.858	-23.0602	104.233	3.01169		1.144	7.07478	102.129	2.24497		1.144	-2.88281	105.635	3.1252		1.144	-27.329	100.748	3.4408		1.42872	4.40798	107.095	3.04042
0.858846	-23.5645	103.888	2.99636		1.146	6.27269	101.887	2.23729		1.146	-3.77396	105.602	3.10008		1.146	-27.4307	100.657	3.44456		1.43146	3.3315	106.994	3.04481
0.860109	-24.0959	103.665	3.00684		1.148	5.20286	102.062	2.2324		1.148	-4.52461	105.471	3.10149		1.148	-27.5458	100.475	3.44262		1.43463	2.56701	106.893	3.04889
0.861854	-24.5833	103.484	3.00443		1.15	4.37145	101.916	2.25243		1.15	-5.26143	105.442	3.09599		1.15	-27.7289	100.472	3.42021		1.43646	1.86657	106.783	3.01973
0.864	-25.0217	103.282	2.98818		1.152	3.31987	101.844	2.24905		1.152	-5.80354	105.377	3.09172		1.152	-27.912	100.387	3.39929		1.43871	0.863073	106.722	3.01883
0.864841	-25.5886	102.991	2.98873		1.154	2.43757	101.813	2.22771		1.154	-6.70686	105.258	3.08257		1.154	-27.9822	100.301	3.41842		1.44145	0.0598542	106.668	3.02067
0.866103	-25.9994	102.711	2.98507		1.156	1.56411	101.691	2.19496		1.156	-7.3679	105.177	3.07626		1.156	-27.85	100.277	3.40478		1.44463	-0.764908	106.649	3.03076
0.867849	-26.2715	102.502	2.98189		1.158	0.645854	101.715	2.22059		1.158	-8.00238	105.05	3.07454		1.158	-28.0298	100.195	3.38763		1.44645	-1.5447	106.423	3.01051
0.87	-26.6707	102.429	2.97908		1.16	-0.0124172	101.631	2.20336		1.16	-8.60423	104.982	3.0628		1.16	-28.0022	100.165	3.38859		1.4487	-2.40671	106.417	3.0144
0.870837	-27.0141	102.032	2.95354		1.162	-0.713835	101.727	2.20447		1.162	-9.32943	104.924	3.0466		1.162	-27.9928	99.9123	3.38696		1.45144	-3.08783	106.333	3.01637
0.872097	-27.3965	101.646	2.95286		1.164	-1.3179	101.466	2.1985		1.164	-9.96779	104.9	3.05803		1.164	-27.9811	99.8867	3.36046		1.45463	-4.11231	106.291	2.99959
0.873845	-27.7522	101.579	2.95285		1.166	-1.92583	101.423	2.20701		1.166	-10.6404	104.851	3.04318		1.166	-27.9673	99.8878	3.37145		1.45645	-4.89034	106.144	2.98548
0.876	-27.9673	101.431	2.94094		1.168	-2.44636	101.443	2.19225		1.168	-11.3396	104.794	3.05247		1.168	-27.7864	99.6779	3.34811		1.45869	-5.45388	105.97	2.98511
0.876832	-28.1855	101.009	2.95208		1.17	-3.19203	101.389	2.20534		1.17	-12.0715	104.65	3.02779		1.17	-27.5286	99.4535	3.32954		1.46144	-5.91837	105.884	2.98659
0.878091	-28.4655	101.033	2.9441		1.172	-3.87741	101.25	2.19056		1.172	-12.6855	104.59	3.03134		1.172	-27.4794	99.5551	3.33244		1.46463	-6.3845	105.927	2.98361
0.87984	-28.7357	100.939	2.91712		1.174	-4.47206	101.439	2.18192		1.174	-13.5258	104.688	3.02933		1.174	-27.1154	99.4313	3.31793		1.46644	-6.78947	105.781	2.97397
0.882	-28.9768	100.518	2.91496		1.176	-5.31786	101.269	2.17112		1.176	-14.2089	104.669	3.02453		1.176	-26.757	99.3957	3.32017		1.46868	-7.35131	105.661	2.95823
0.882828	-29.1433	100.293	2.91121		1.178	-5.85498	101.37	2.17494		1.178	-14.5995	104.668	3.02193		1.178	-26.7902	99.308	3.309		1.47143	-7.73188	105.618	2.95067
0.884085	-29.3979	100.209	2.91658		1.18	-6.49887	101.148	2.17619		1.18	-15.0088	104.659	3.03331		1.18	-26.4234	99.2452	3.31644		1.47462	-8.25862	105.587	2.95984
0.885836	-29.6605	100.025	2.92437		1.182	-7.0797	101.358	2.17965		1.182	-15.339	104.585	3.01711		1.182	-25.8144	99.2208	3.31526		1.47643	-8.6952	105.417	2.95468
0.888	-29.842	100.01	2.9086		1.184	-7.67546	101.278	2.16292		1.184	-15.7578	104.551	3.00776		1.184	-25.4797	99.1408	3.3078		1.47867	-9.19326	105.31	2.94743
0.888823	-29.9285	99.7529	2.89176		1.186	-8.1888	101.221	2.15699		1.186	-15.8817	104.544	2.99589		1.186	-25.0958	99.0719	3.29055		1.48142	-9.51517	105.333	2.96612
0.890078	-29.9195	99.4963	2.89506		1.188	-8.6164	101.335	2.16937		1.188	-16.1599	104.629	2.99624		1.188	-24.5183	98.9902	3.29508		1.48462	-10.0717	105.255	2.94057
0.891831	-29.9193	99.515	2.89584		1.19	-9.16072	101.332	2.1443		1.19	-16.5167	104.567	3.01012		1.19	-24.2545	98.9808	3.26124		1.48642	-10.2852	105.138	2.93349
0.894	-30.087	99.5213	2.88968		1.192	-9.79133	101.309	2.14969		1.192	-16.7856	104.409	2.96038		1.192	-23.6482	98.7403	3.25219		1.48867	-10.5343	104.984	2.92562
0.894819	-30.2207	99.1718	2.87554		1.194	-10.1863	101.283	2.14493		1.194	-17.1391	104.56	2.97722		1.194	-23.1382	98.8447	3.2615		1.49141	-10.7875	104.885	2.92275
0.896072	-30.2588	98.9807	2.86053		1.196	-10.797	101.411	2.14517		1.196	-17.3952	104.462	2.95713		1.196	-22.7996	98.8397	3.24421		1.49462	-11.1061	104.936	2.91784
0.897827	-30.2956	98.9609	2.86056		1.198	-11.2157	101.298	2.14382		1.198	-17.6657	104.516	2.96331		1.198	-22.3305	98.747	3.25239		1.49642	-11.3802	104.669	2.89741
0.9	-30.3083	98.9025	2.86369		1.2	-11.838	101.491	2.13512		1.2	-17.9057	104.419	2.97782		1.2	-21.9975	98.6998	3.22145		1.49866	-11.6066	104.63	2.89861
0.900814	-30.2581	98.734	2.85157		1.202	-12.4681	101.262	2.11772		1.202	-18.1652	104.534	2.96417		1.202	-21.8017	98.6803	3.21886		1.50141	-11.8153	104.527	2.9001
0.902066	-30.345	98.6783	2.85538		1.204	-13.1103	101.345	2.11023		1.204	-18.356	104.463	2.94757		1.204	-20.6467	98.5248	3.20301		1.50462	-12.0119	104.449	2.88759
0.903822	-30.4116	98.5959	2.85836		1.206	-13.5838	101.384	2.11375		1.206	-18.4512	104.446	2.92939		1.206	-19.8584	98.5431	3.13664		1.50641	-12.1031	104.484	2.8723
0.906	-30.3349	98.5542	2.83996		1.208	-13.9788	101.509	2.11521		1.208	-18.6315	104.409	2.9546		1.208	-19.7301	98.4681	3.17501		1.50865	-12.2324	104.208	2.88682
0.90681	-30.1662	98.4528	2.82817		1.21	-14.3002	101.411	2.10828		1.21	-18.8566	104.348	2.93699		1.21	-19.5619	98.5198	3.18628		1.5114	-12.43	104.133	2.8964
0.90806	-29.9017	98.3657	2.82566		1.212	-14.2272	101.448	2.10173		1.212	-19.0585	104.277	2.91471		1.212	-18.6575	98.3831	3.18033		1.51461	-12.5639	104.07	2.8647
0.909818	-29.5629	98.243	2.81003		1.214	-14.319	101.288	2.10036		1.214	-19.0259	104.349	2.90646		1.214	-17.8095	98.377	3.16847		1.5164	-12.5426	103.915	2.87067
0.912	-29.1306	98.2404	2.80573		1.216	-14.3041	101.272	2.09105		1.216	-19.188	104.35	2.92926		1.216	-17.4809	98.3015	3.15619		1.51864	-12.6947	103.786	2.85501
0.912805	-28.7003	98.1786	2.80503		1.218	-14.2748	101.278	2.09307		1.218	-19.3689	104.256	2.90845		1.218	-17.1142	98.2954	3.10886		1.52139	-12.6628	103.708	2.86706
0.914054	-28.6183	98.0652	2.78609		1.22	-14.3572	101.277	2.09879		1.22	-19.4242	104.251	2.90635		1.22	-16.5322	98.2343	3.13165		1.52461	-12.6079	103.693	2.83942
0.915813	-28.4484	97.937	2.77749		1.222	-14.6443	101.303	2.06735		1.222	-19.4618	104.228	2.88281		1.222	-15.9094	98.1238	3.14804		1.52639	-12.7572	103.415	2.82434
0.918	-28.1255	97.9471	2.78214		1.224	-14.8821	101.504	2.06263		1.224	-19.3689	104.126	2.89315		1.224	-15.2533	98.0743	3.11738		1.52863	-12.6015	103.322	2.84819
0.918801	-28.0401	97.7913	2.76415		1.226	-15.0575	101.305	2.08132		1.226	-19.2544	104.102	2.90424		1.226	-14.5945	98.171	3.14403		1.53139	-12.5086	103.212	2.8219
0.920047	-27.8592	97.5776	2.7572		1.228	-15.3634	101.18	2.06059		1.228	-19.344	103.998	2.88917		1.228	-14.1553	98.0554	3.10402		1.53461	-12.3843	103.175	2.82836
0.921809	-27.5806	97.5271	2.76642		1.23	-15.2146	101.204	2.05223		1.23	-19.4928	104.051	2.87911		1.23	-13.6054	97.7727	3.06643		1.53639	-12.291	103.028	2.81228
0.924	-27.6913	97.6127	2.76368		1.232	-15.3938	101.047	2.04846		1.232	-18.9429	103.905	2.86222		1.232	-12.9151	97.9282	3.08382		1.53862	-11.9599	102.959	2.80841
0.924796	-27.6998	97.425	2.75659		1.234	-15.2472	100.975	2.05712		1.234	-18.9263	103.883	2.86821		1.234	-12.2286	97.7405	3.05592		1.54138	-12.134	102.731	2.81233
0.926041	-27.2808	97.3262	2.74777		1.236	-15.3822	100.94	2.07711		1.236	-18.9949	103.882	2.84428		1.236	-11.7529	97.6961	3.05839		1.54461	-11.8509	102.769	2.79497
0.927804	-26.8531	97.4451	2.72662		1.238	-15.2328	100.842	2.02818		1.238	-18.6868	103.667	2.85564		1.238	-11.1897	97.5505	3.06079		1.54638	-11.5035	102.547	2.78904
0.93	-26.5667	97.4539	2.72001		1.24	-15.2976	100.747	2.0347		1.24	-18.4302	103.695	2.84248		1.24	-10.5099	97.4994	3.05328		1.54861	-11.3955	102.364	2.77877
0.930791	-26.1693	97.178	2.72745		1.242	-15.3059	100.84	2.0314		1.242	-18.3466	103.602	2.82867		1.242	-9.94621	97.4361	3.04173		1.55137	-11.049	102.326	2.78023
0.932035	-25.81	97.164	2.72314		1.244	-15.2904	100.695	2.01818		1.244	-18.2968	103.634	2.81967		1.244	-9.4727	97.4	3.03507		1.5546	-10.8523	102.292	2.77519
0.933799	-25.5521	97.241	2.70704		1.246	-15.3827	100.729	2.03632		1.246	-18.0916	103.538	2.81107		1.246	-8.9483	97.3095	3.02039		1.55637	-10.4789	102.062	2.75944
0.936	-25.2557	97.2023	2.70182		1.248	-15.2638	100.612	2.01272		1.248	-17.8034	103.513	2.8102		1.248	-8.32211	97.2023	3.00234		1.5586	-10.1669	101.929	2.72019
0.936787	-24.8547	97.0753	2.69402		1.25	-15.3518	100.799	2.03073		1.25	-17.5611	103.373	2.79468		1.25	-7.67601	97.0151	3.00165		1.56136	-10.0239	101.864	2.74982
0.938029	-24.4195	97.0345	2.67803		1.252	-15.3573	100.51	2.01123		1.252	-17.3836	103.15	2.79414		1.252	-7.16212	97.0423	2.99424		1.5646	-9.69097	101.851	2.73915
0.939795	-24.0482	96.9829	2.67162		1.254	-15.2339	100.547	2.00894		1.254	-17.1446	103.282	2.79395		1.254	-6.71571	96.9229	2.96694		1.56637	-9.48886	101.757	2.73529
0.942	-23.7986	96.9868	2.67826		1.256	-15.2096	100.4	2.00334		1.256	-16.8049	103.136	2.78623		1.256	-6.24939	96.8001	2.96696		1.56859	-9.12439	101.616	2.73416
0.942782	-23.5236	96.8631	2.67773		1.258	-14.881	100.357	1.98955		1.258	-16.4631	103.141	2.74634		1.258	-5.81128	96.7579	2.9626		1.57136	-8.74909	101.489	2.71013
0.944022	-23.1803	96.7884	2.66842		1.26	-14.7195	100.259	1.98618		1.26	-16.1008	103.116	2.76784		1.26	-5.36266	96.563	2.95872		1.5746	-8.34961	101.457	2.70637
0.94579	-22.7168	96.7436	2.64897		1.262	-14.4794	100.277	1.96985		1.262	-15.838	103.091	2.77079		1.262	-4.99868	96.5396	2.93578		1.57636	-7.86155	101.246	2.70802
0.948	-22.2857	96.7718	2.64084		1.264	-14.1691	100.274	1.97675		1.264	-15.5404	102.867	2.74598		1.264	-4.39628	96.408	2.93831		1.57859	-7.50031	101.257	2.68053
0.948778	-21.9958	96.6956	2.64299		1.266	-13.9019	100.245	1.96914		1.266	-15.2893	102.929	2.74866		1.266	-3.94545	96.283	2.95065		1.58135	-7.31015	101.173	2.68968
0.950016	-21.6856	96.5997	2.63292		1.268	-13.8555	100.089	1.96333		1.268	-14.891	102.747	2.74547		1.268	-3.51951	96.1608	2.92686		1.5846	-6.99188	101.028	2.6978
0.951786	-21.257	96.5757	2.62856		1.27	-13.5711	100.021	1.96961		1.27	-14.4844	102.715	2.73608		1.27	-3.25011	95.8531	2.90798		1.58635	-6.4362	101.058	2.68807
0.954	-20.8375	96.6474	2.63247		1.272	-13.3836	100.04	1.96008		1.272	-14.147	102.656	2.73765		1.272	-2.88668	95.9642	2.90377		1.58858	-6.0557	100.796	2.67002
0.954773	-20.3761	96.4701	2.60758		1.274	-13.2575	99.9056	1.9439		1.274	-13.6862	102.559	2.72871		1.274	-2.37721	95.8209	2.88367		1.59134	-5.75043	100.719	2.65707
0.95601	-19.8936	96.339	2.58982		1.276	-13.1236	100.051	1.93219		1.276	-13.5247	102.51	2.72561		1.276	-2.08514	95.7004	2.86269		1.59459	-5.32252	100.708	2.66071
0.957781	-19.4754	96.3938	2.59483		1.278	-12.7757	99.6507	1.93235		1.278	-13.0423	102.393	2.71698		1.278	-1.84562	95.557	2.86659		1.59634	-4.85824	100.494	2.65146
0.96	-19.1476	96.4602	2.58369		1.28	-12.4449	99.6923	1.93008		1.28	-12.5975	102.292	2.72221		1.28	-1.46504	95.4943	2.8518		1.59857	-4.57849	100.373	2.64172
0.960769	-18.7405	96.3603	2.56814		1.282	-12.1108	99.6073	1.91188		1.282	-12.1561	102.222	2.70256		1.282	-1.30075	95.4482	2.86869		1.60134	-4.19509	100.381	2.64083
0.962004	-18.2472	96.413	2.58055		1.284	-11.7728	99.6473	1.90775		1.284	-11.7307	102.15	2.69727		1.284	-1.17075	95.061	2.83385		1.60459	-3.69964	100.201	2.62007
0.963777	-17.867	96.3891	2.58076		1.286	-11.4514	99.5335	1.91769		1.286	-11.2312	101.977	2.68008		1.286	-0.707197	95.0933	2.83868		1.60634	-3.29121	100.106	2.62294
0.966	-17.544	96.2952	2.56001		1.288	-11.2334	99.4307	1.90575		1.288	-10.9054	102.068	2.65539		1.288	-0.557841	95.0827	2.82207		1.60856	-2.94019	99.9696	2.61251
0.966764	-17.1245	96.267	2.55056		1.29	-11.0813	99.4729	1.88824		1.29	-10.3843	101.825	2.66158		1.29	-0.433379	94.8327	2.80898		1.61133	-2.64362	99.8719	2.60181
0.967998	-16.8337	96.3394	2.54405		1.292	-10.5597	99.2452	1.88763		1.292	-10.2361	101.74	2.66028		1.292	-0.145178	94.8516	2.83018		1.61459	-2.3616	99.8133	2.59897
0.969772	-16.5263	96.3081	2.52737		1.294	-10.2311	99.2752	1.88305		1.294	-9.7421	101.629	2.64548		1.294	0.0688985	94.6389	2.78995		1.61633	-1.85621	99.6586	2.58897
0.972	-15.9254	96.3047	2.52597		1.296	-10.2045	99.1313	1.87018		1.296	-9.34824	101.546	2.64064		1.296	0.0296236	94.5517	2.82462		1.61855	-1.58521	99.6098	2.58612
0.97276	-15.2766	96.2051	2.53049		1.298	-9.71831	98.9891	1.8737		1.298	-8.92507	101.375	2.64206		1.298	0.221573	94.4062	2.77116		1.62132	-1.13041	99.553	2.58165
0.973991	-14.8844	96.1745	2.52617		1.3	-9.18395	98.8286	1.86849		1.3	-8.24965	101.288	2.63444		1.3	0.268592	94.3417	2.75846		1.62459	-0.803178	99.4717	2.58952
0.975768	-14.5983	96.2051	2.51574		1.302	-8.72371	98.8686	1.86884		1.302	-7.96587	101.212	2.62451		1.302	0.398587	94.1845	2.77055		1.62632	-0.488348	99.2335	2.55445
0.978	-14.2178	96.2897	2.50581		1.304	-8.21978	98.6625	1.8706		1.304	-7.64448	101.134	2.60726		1.304	0.43233	94.1596	2.74291		1.62854	-0.18058	99.1559	2.54981
0.978755	-13.7084	96.2595	2.49398		1.306	-8.07872	98.6798	1.8424		1.306	-7.15327	100.919	2.6253		1.306	0.682916	93.9596	2.73955		1.63131	0.317408	99.0009	2.54662
0.979985	-13.2397	96.2357	2.48896		1.308	-7.71861	98.5442	1.80533		1.308	-6.84405	100.784	2.59742		1.308	0.632024	93.8735	2.7256		1.63458	0.417771	99.0322	2.54339
0.981763	-12.8974	96.1711	2.48482		1.31	-7.09519	98.3704	1.85371		1.31	-6.495	100.58	2.59377		1.31	0.727169	93.7852	2.71915		1.63632	0.861228	98.949	2.54047
0.984	-12.5749	96.2025	2.46801		1.312	-6.82081	98.3126	1.82814		1.312	-6.10944	100.491	2.61002		1.312	0.485988	93.6602	2.70366		1.63853	1.17973	98.8604	2.53023
0.984751	-12.1368	96.2191	2.45096		1.314	-6.37994	98.0593	1.82		1.314	-5.7272	100.491	2.57534		1.314	0.658576	93.4175	2.69717		1.64131	1.35004	98.7131	2.52175
0.985979	-11.7066	96.2228	2.45405		1.316	-6.18688	98.1388	1.82461		1.316	-5.30569	100.254	2.56702		1.316	0.45501	93.3786	2.69579		1.64458	1.5691	98.6905	2.50166
0.987759	-11.3842	96.1522	2.44761		1.318	-5.83839	97.8005	1.80968		1.318	-4.97766	100.213	2.56037		1.318	0.246466	93.2131	2.69332		1.64631	1.74349	98.579	2.49474
0.99	-11.0066	96.1753	2.43226		1.32	-5.41798	97.8499	1.79681		1.32	-4.51576	100.08	2.55615		1.32	0.456117	93.0964	2.67613		1.64852	2.1757	98.444	2.49238
0.990746	-10.541	96.1145	2.43491		1.322	-5.07391	97.7166	1.80152		1.322	-4.1739	99.9117	2.54229		1.322	0.628152	92.9681	2.65511		1.6513	2.40787	98.3593	2.48633
0.991973	-10.1664	96.0576	2.43336		1.324	-4.83881	97.5716	1.79158		1.324	-3.59806	99.7418	2.52865		1.324	0.468839	92.7915	2.67076		1.65458	2.62165	98.3658	2.47715
0.993754	-9.75141	96.0906	2.40404		1.326	-4.31386	97.455	1.79791		1.326	-3.26173	99.5912	2.52683		1.326	0.0683454	92.621	2.65115		1.6563	2.86558	98.2078	2.46917
0.996	-9.38143	96.2197	2.38942		1.328	-3.8857	97.2256	1.78168		1.328	-3.10684	99.4724	2.54831		1.328	0.245359	92.4793	2.66205		1.65851	3.13095	98.1825	2.44739
0.996742	-9.15669	96.1433	2.39822		1.33	-3.50512	97.1095	1.77338		1.33	-2.66597	99.3291	2.5016		1.33	0.275784	92.3938	2.6365		1.66129	3.05199	98.0936	2.46077
0.997967	-8.78084	96.0698	2.4034		1.332	-3.31705	96.9229	1.7644		1.332	-2.30198	99.0963	2.50514		1.332	0.178979	92.2338	2.62888		1.66458	3.45796	97.9898	2.45606
0.99975	-8.34345	96.0206	2.40489		1.334	-2.90549	96.9384	1.76019		1.334	-2.1045	99.0014	2.50686		1.334	-0.348191	92.1311	2.62299		1.66629	3.7644	97.9165	2.44263
1.002	-7.9974	96.0353	2.40208		1.336	-2.55865	96.8029	1.75581		1.336	-1.92583	98.9114	2.49478		1.336	-0.314447	91.9655	2.62666		1.6685	3.76032	97.7256	2.43355
1.00274	-7.43806	95.955	2.3791		1.338	-2.04697	96.7546	1.74052		1.338	-1.41857	98.8431	2.47535		1.338	-0.279598	91.86	2.61262		1.67128	3.81132	97.701	2.42544
1.00396	-6.9364	95.8836	2.36745		1.34	-1.88157	96.6129	1.74753		1.34	-1.16301	98.7659	2.47296		1.34	-0.398529	91.5978	2.58811		1.67457	3.9371	97.6699	2.42444
1.00575	-6.85659	95.9184	2.37026		1.342	-1.76873	96.4852	1.74357		1.342	-0.833319	98.602	2.49636		1.342	-0.721579	91.6478	2.58935		1.67629	3.97785	97.5352	2.41722
1.008	-6.6532	96.0297	2.35005		1.344	-1.20118	96.4191	1.72804		1.344	-0.526311	98.3526	2.44766		1.344	-0.598776	91.4412	2.58487		1.6785	4.13072	97.4169	2.41731
1.00873	-6.15307	95.8836	2.31574		1.346	-1.00757	96.2003	1.73605		1.346	-0.223728	98.3509	2.4759		1.346	-0.941187	91.2874	2.56369		1.68128	4.24918	97.3443	2.39375
1.00995	-5.85777	95.8084	2.31074		1.348	-0.690602	96.1542	1.69928		1.348	0.03073	98.156	2.44188		1.348	-1.00204	91.174	2.56103		1.68457	4.31683	97.2702	2.3986
1.01174	-5.46607	95.8005	2.32238		1.35	-0.487036	96.0497	1.70675		1.35	0.195021	98.1121	2.44015		1.35	-1.17905	91.1107	2.55104		1.68628	4.41176	97.1862	2.38857
1.014	-5.00974	95.752	2.3223		1.352	-0.326617	95.9614	1.70229		1.352	0.390843	97.8188	2.42108		1.352	-1.50265	90.8452	2.54036		1.68849	4.43707	97.0016	2.37353
1.01473	-4.95751	95.6278	2.31316		1.354	0.0567289	95.9248	1.70554		1.354	0.514199	97.9149	2.42201		1.354	-1.74162	90.728	2.51801		1.69127	4.42372	97.0547	2.37116
1.01595	-4.8109	95.5901	2.30967		1.356	0.308421	95.8414	1.6888		1.356	0.886482	97.7616	2.42498		1.356	-1.96621	90.6508	2.5333		1.69457	4.53187	96.8828	2.39318
1.01774	-4.44713	95.5029	2.30281		1.358	0.570069	95.6359	1.68916		1.358	1.15034	97.7038	2.41543		1.358	-2.27875	90.5747	2.50133		1.69627	4.55702	96.7581	2.35936
1.02	-4.11859	95.5032	2.29872		1.36	0.74653	95.5332	1.68441		1.36	1.22668	97.5267	2.40488		1.36	-2.41262	90.3492	2.50349		1.69848	4.39179	96.7038	2.33996
1.02072	-3.62335	95.4249	2.29023		1.362	0.961713	95.4515	1.66812		1.362	1.44629	97.1873	2.39693		1.362	-2.46738	90.387	2.51112		1.70126	4.55768	96.55	2.32934
1.02194	-3.38219	95.2964	2.273		1.364	1.23221	95.341	1.66416		1.364	1.56522	97.24	2.39739		1.364	-2.60733	90.1365	2.50756		1.70457	4.56071	96.6381	2.33561
1.02373	-3.51532	95.2536	2.27369		1.366	1.56799	95.3732	1.6628		1.366	1.82632	97.1095	2.36731		1.366	-2.83413	90.0987	2.49285		1.70626	4.48916	96.4361	2.34003
1.026	-3.36185	95.2999	2.27448		1.368	1.82521	95.1755	1.64277		1.368	2.06086	96.8984	2.40621		1.368	-2.98349	89.9965	2.49359		1.70847	4.47535	96.3892	2.32478
1.02672	-2.90443	95.1143	2.24804		1.37	1.93972	95.0149	1.64376		1.37	2.16541	96.9829	2.38847		1.37	-3.37789	89.8837	2.47616		1.71126	4.34023	96.223	2.31932
1.02794	-2.56688	95.0685	2.24622		1.372	2.23787	94.9044	1.63643		1.372	2.05367	96.7485	2.36538		1.372	-3.34526	89.791	2.47183		1.71456	4.25566	96.1681	2.30849
1.02973	-2.33418	95.1253	2.25194		1.374	2.38778	94.735	1.6326		1.374	2.42706	96.6524	2.33855		1.374	-3.79001	89.686	2.45109		1.71626	4.42315	96.166	2.30972
1.032	-2.13161	95.0588	2.23019		1.376	2.57088	94.7233	1.62594		1.376	2.60462	96.5735	2.34815		1.376	-4.13905	89.5272	2.4445		1.71846	4.23604	95.9226	2.28772
1.03271	-2.08386	94.8786	2.22011		1.378	2.70475	94.7344	1.64562		1.378	2.29817	96.4241	2.34839		1.378	-4.20654	89.5766	2.43185		1.72125	4.17335	95.9829	2.29935
1.03393	-2.04192	94.8242	2.22535		1.38	2.92436	94.5256	1.61231		1.38	2.47131	96.2941	2.32957		1.38	-4.58712	89.5905	2.43273		1.72456	4.16485	95.8831	2.28391
1.03572	-1.74381	94.695	2.21792		1.382	2.93099	94.2651	1.62712		1.382	2.70419	96.2275	2.34299		1.382	-4.47206	89.2728	2.38512		1.72625	3.88321	95.8232	2.27734
1.038	-1.40585	94.7056	2.20922		1.384	3.27838	94.194	1.6018		1.384	2.89227	96.0047	2.30027		1.384	-4.80175	89.1456	2.41124		1.72845	3.67518	95.7661	2.27642
1.03871	-1.28266	94.7491	2.20178		1.386	3.12516	94.2201	1.58913		1.386	2.6439	95.9709	2.29591		1.386	-5.11208	89.1633	2.39949		1.73124	3.81327	95.6026	2.26721
1.03992	-1.22232	94.6179	2.19531		1.388	3.00235	94.1162	1.58979		1.388	2.67322	95.792	2.30073		1.388	-5.10931	89.0628	2.40323		1.73456	3.58136	95.6507	2.25392
1.04172	-1.09999	94.4579	2.18563		1.39	3.40008	93.9613	1.58189		1.39	2.76781	95.6754	2.28429		1.39	-5.49376	88.9439	2.40068		1.73624	3.35918	95.4955	2.26957
1.044	-1.02306	94.54	2.17622		1.392	3.50242	93.8146	1.58244		1.392	2.94814	95.5171	2.27538		1.392	-5.76039	88.8945	2.36702		1.73844	3.28666	95.3782	2.25169
1.04471	-0.93872	94.4161	2.16773		1.394	3.3951	93.7496	1.56708		1.394	2.90499	95.5232	2.28592		1.394	-5.96506	88.7579	2.37941		1.74123	3.26593	95.3348	2.23816
1.04592	-0.707573	94.2999	2.16011		1.396	3.47863	93.5897	1.55499		1.396	2.77057	95.2804	2.27427		1.396	-6.23114	88.7018	2.3511		1.74456	2.97774	95.2249	2.24101
1.04771	-0.448766	94.3877	2.15386		1.398	3.5085	93.5341	1.57355		1.398	2.88231	95.2527	2.2681		1.398	-6.4784	88.4324	2.35124		1.74624	2.91247	95.1666	2.23291
1.05	-0.348191	94.4334	2.15239		1.4	3.80555	93.4208	1.54849		1.4	2.95921	95.1138	2.26727		1.4	-6.54423	88.5723	2.36031		1.74843	2.84463	95.0535	2.21694
1.0507	-0.377629	94.1534	2.14441		1.402	3.83708	93.3342	1.54808		1.402	3.07426	94.9344	2.25563		1.402	-6.85345	88.4052	2.35961		1.75123	2.39422	94.9823	2.23418
1.05191	-0.415618	93.9812	2.13585		1.404	3.77734	93.2653	1.55528		1.404	3.02559	94.9505	2.24815		1.404	-7.12174	88.3102	2.32781		1.75455	2.34951	94.9747	2.20195
1.05371	-0.338037	93.9805	2.13734		1.406	3.81219	93.072	1.53589		1.406	2.78717	94.6439	2.2248		1.406	-7.39168	88.3685	2.33943		1.75623	1.99911	94.906	2.20808
1.056	-0.0610961	93.9951	2.12582		1.408	3.99308	93.0237	1.54676		1.408	2.74845	94.6406	2.2474		1.408	-7.65886	88.1885	2.31221		1.75842	2.11448	94.7333	2.20862
1.0567	0.250171	93.8759	2.09836		1.41	3.97427	92.9398	1.51278		1.41	2.77223	94.5456	2.22928		1.41	-7.69095	88.1813	2.31744		1.76122	1.90881	94.6406	2.18955
1.0579	0.298412	93.8328	2.10181		1.412	3.82602	92.8643	1.51304		1.412	2.65441	94.4678	2.21079		1.412	-7.94651	87.9675	2.29517		1.76455	1.69417	94.6318	2.18923
1.0597	0.13996	93.7268	2.11116		1.414	3.91508	92.7298	1.49847		1.414	2.68207	94.3167	2.22064		1.414	-8.02451	87.9958	2.29098		1.76622	1.52259	94.5504	2.18928
1.062	0.0633669	93.683	2.09452		1.416	4.03733	92.6971	1.49644		1.416	2.43259	94.1968	2.20232		1.416	-8.4073	87.8814	2.27404		1.76842	1.31876	94.4205	2.17945
1.06269	0.142804	93.6123	2.08428		1.418	3.97427	92.6687	1.48416		1.418	2.58028	94.1251	2.18935		1.418	-8.66065	87.858	2.27792		1.77121	1.08909	94.3206	2.16775
1.0639	0.277424	93.4769	2.08425		1.42	3.86253	92.4588	1.49682		1.42	2.44089	93.9824	2.1839		1.42	-8.68444	87.913	2.27131		1.77455	0.902651	94.3682	2.16045
1.0657	0.381926	93.3912	2.06653		1.422	3.71871	92.4627	1.49796		1.422	2.31587	94.1323	2.18834		1.422	-8.98757	87.7697	2.26201		1.77621	0.858376	94.1783	2.13936
1.068	0.420714	93.4864	2.04959		1.424	3.61416	92.3327	1.49745		1.424	2.27272	93.8841	2.17663		1.424	-9.10208	87.6536	2.24394		1.77841	0.557894	94.165	2.15256
1.06869	0.3084	93.3772	2.03914		1.426	3.47918	92.2772	1.48		1.426	2.10843	93.9263	2.16119		1.426	-9.27135	87.5514	2.24273		1.7812	0.48881	93.9568	2.12679
1.06989	0.14388	93.2518	2.02735		1.428	3.33149	92.2794	1.46616		1.428	2.03818	93.7319	2.14884		1.428	-9.48874	87.4259	2.2316		1.78455	0.417185	93.9325	2.13566
1.0717	0.298257	93.1895	2.02954		1.43	3.38017	92.13	1.4912		1.43	1.9635	93.5841	2.15137		1.43	-9.4987	87.3287	2.22984		1.78621	0.196868	93.8665	2.11749
1.074	0.551262	93.1914	2.04304		1.432	3.1943	91.9789	1.45267		1.432	1.65262	93.538	2.14564		1.432	-9.62095	87.3248	2.2178		1.7884	0.0971596	93.7475	2.12799
1.07468	0.453157	93.1646	2.03268		1.434	3.19098	92.0389	1.45186		1.434	1.68692	93.5147	2.12197		1.434	-9.63478	87.2543	2.21347		1.7912	-0.138641	93.7667	2.10901
1.07589	0.266024	93.1407	2.016		1.436	3.11022	92.0672	1.43864		1.436	1.51378	93.4153	2.14288		1.436	-9.93847	87.1487	2.2137		1.79454	-0.351167	93.6262	2.09434
1.07769	0.176388	92.9499	2.01719		1.438	2.9415	91.9128	1.44918		1.438	1.25766	93.3886	2.1244		1.438	-9.98438	87.1954	2.19468		1.7962	-0.554367	93.6305	2.09165
1.08	0.0937911	92.8643	2.01782		1.44	2.79049	91.755	1.43329		1.44	1.28421	93.2525	2.13251		1.44	-10.0685	87.0782	2.187		1.79839	-0.586877	93.4764	2.09335
1.08068	0.109558	92.8076	2.00355		1.442	2.75343	91.7245	1.44208		1.442	0.913034	93.1581	2.11625		1.442	-10.3163	86.9532	2.17171		1.80119	-0.755136	93.404	2.09263
1.08188	0.112704	92.6872	1.99509		1.444	2.51612	91.69	1.41723		1.444	0.965032	93.0814	2.11438		1.444	-10.4114	87.0415	2.1578		1.80454	-0.783303	93.3142	2.07627
1.08369	0.00626752	92.6202	1.99725		1.446	2.60628	91.6534	1.41557		1.446	0.833378	92.9992	2.09583		1.446	-10.4634	86.9738	2.16282		1.80619	-0.959749	93.2378	2.0829
1.086	-0.0256933	92.6476	1.9969		1.448	2.50229	91.5095	1.41139		1.448	0.81291	92.9992	2.1009		1.448	-10.6205	86.9282	2.17332		1.80838	-1.18435	93.178	2.06073
1.08667	-0.0583085	92.4259	1.98901		1.45	2.28821	91.5367	1.40765		1.45	0.482116	92.8504	2.08307		1.45	-10.6332	86.806	2.14046		1.81118	-1.06658	93.0947	2.06109
1.08787	-0.238645	92.3481	1.9813		1.452	2.312	91.4712	1.3908		1.452	0.310633	93.1203	2.05121		1.452	-10.6283	86.8566	2.12799		1.81454	-1.46382	93.1528	2.05812
1.08968	-0.338532	92.3564	1.96825		1.454	2.37561	91.2896	1.39154		1.454	0.192255	92.7882	2.07076		1.454	-10.7323	86.7699	2.1184		1.81618	-1.4926	93.0464	2.02755
1.092	-0.368105	92.2799	1.95688		1.456	1.84512	91.3373	1.39101		1.456	-0.119179	92.7115	2.08664		1.456	-10.7583	87.0165	2.14373		1.81837	-1.38925	92.8229	2.04847
1.09267	-0.533355	92.1257	1.95606		1.458	1.82521	91.4479	1.38994		1.458	-0.297852	92.641	2.0764		1.458	-10.7594	86.6027	2.11741		1.82118	-1.6609	92.8897	2.03023
1.09387	-0.644636	92.0217	1.95367		1.46	1.67032	91.1557	1.36989		1.46	-0.474313	92.6104	2.06587		1.46	-10.901	86.7527	2.10847		1.82454	-1.52534	92.8604	2.02271
1.09568	-0.662024	91.9365	1.93227		1.462	1.64432	91.1724	1.38002		1.462	-0.557288	92.5171	2.02582		1.462	-11.0382	86.6222	2.09266		1.82618	-1.75548	92.6456	1.99805
1.098	-0.760301	91.9922	1.92151		1.464	1.54862	91.0863	1.39218		1.464	-0.816724	92.4427	2.05417		1.464	-10.984	86.6039	2.08804		1.82836	-1.8511	92.6813	2.00889
1.09866	-0.820078	91.8224	1.92396		1.466	1.30191	91.2035	1.35695		1.466	-1.03855	92.411	2.03795		1.466	-11.0537	86.5583	2.08118		1.83117	-1.8774	92.6046	2.00721
1.09986	-0.871364	91.5923	1.91205		1.468	1.03971	91.0185	1.3673		1.468	-1.13369	92.3449	2.04976		1.468	-11.0553	86.475	2.08488		1.83453	-1.97667	92.4791	1.99526
1.10167	-1.10828	91.6166	1.9066		1.47	0.864355	90.8541	1.34464		1.47	-1.25483	92.1905	2.02765		1.47	-10.9281	86.4494	2.06289		1.83617	-2.24314	92.3953	1.99446
1.104	-1.41359	91.6517	1.9055		1.472	0.900864	90.7308	1.35809		1.472	-1.40308	92.1638	2.01462		1.472	-10.8938	86.4628	2.06063		1.83835	-2.28217	92.3203	1.98238
1.10466	-1.66455	91.3593	1.88716		1.474	0.639215	90.8174	1.34354		1.474	-1.72724	92.1961	2.01298		1.474	-10.9447	86.3178	2.04328		1.84116	-2.1879	92.3003	1.98404
1.10585	-1.93818	91.3588	1.89601		1.476	0.433437	90.7425	1.34093		1.476	-1.89651	92.0622	1.99807		1.476	-10.9292	86.3689	2.02683		1.84453	-2.30764	92.304	1.96937
1.10767	-2.10586	91.4117	1.90764		1.478	0.32225	90.7608	1.34471		1.478	-1.93357	91.9978	2.04178		1.478	-10.8733	86.3883	2.01862		1.84616	-2.40473	92.1683	1.96468
1.11	-2.08016	91.2324	1.88642		1.48	-0.0317781	90.7119	1.31965		1.48	-2.10339	91.8756	1.99574		1.48	-10.9342	86.2328	2.01407		1.84834	-2.4004	92.0433	1.94344
1.11066	-2.13523	91.0312	1.88004		1.482	-0.0234806	90.5842	1.29865		1.482	-2.38053	91.9161	1.97718		1.482	-10.9663	86.2828	2.02651		1.85115	-2.27958	92.0329	1.95959
1.11185	-2.31555	90.9353	1.88661		1.484	-0.218196	90.472	1.32479		1.484	-2.36228	91.8122	1.98408		1.484	-10.9961	86.1706	2.00384		1.85453	-2.50734	91.9326	1.95641
1.11366	-2.39359	90.8582	1.86572		1.486	-0.456612	90.4836	1.31481		1.486	-2.62116	91.5978	1.9732		1.486	-10.9497	86.1717	1.98817		1.85616	-2.5234	91.891	1.91567
1.116	-2.5144	90.8769	1.85537		1.488	-0.625328	90.3825	1.29371		1.488	-2.67039	91.6167	1.97213		1.488	-10.9297	86.0656	1.99481		1.85833	-2.31276	91.7796	1.92792
1.11665	-2.83736	90.6708	1.85937		1.49	-0.690049	90.3781	1.30138		1.49	-2.72626	91.6167	1.95906		1.49	-10.9226	86.0073	1.97396		1.86115	-2.49383	91.7512	1.92897
1.11784	-3.04329	90.5219	1.83822		1.492	-0.807874	90.2292	1.29178		1.492	-2.88945	91.5317	1.94838		1.492	-10.7422	86.0212	1.97161		1.86453	-2.59826	91.6925	1.91151
1.11966	-3.04501	90.4853	1.82097		1.494	-1.13258	90.2826	1.296		1.494	-3.10242	91.4295	1.9383		1.494	-10.7101	85.9357	1.9878		1.86615	-2.64524	91.5371	1.92519
1.122	-3.38398	90.4042	1.82518		1.496	-1.13977	90.1787	1.28515		1.496	-3.06369	91.4923	1.92821		1.496	-10.6128	85.7624	1.95831		1.86833	-2.587	91.5741	1.90171
1.12265	-3.93312	90.2455	1.81496		1.498	-1.26479	90.0732	1.2912		1.498	-3.15607	91.2829	1.92276		1.498	-10.3965	85.8579	1.94147		1.87114	-2.59857	91.436	1.88337
1.12384	-4.02273	90.2956	1.81213		1.5	-1.41359	90.1148	1.29358		1.5	-3.47249	91.299	1.93416		1.5	-10.3755	85.7507	1.93341		1.87452	-2.562	91.3637	1.8939
1.12565	-3.97461	90.3251	1.81293		1.502	-1.61052	90.0276	1.27233		1.502	-3.69209	91.2296	1.91242		1.502	-10.4535	85.6629	1.93332		1.87614	-2.58712	91.4198	1.90354
1.128	-4.12799	90.2553	1.79918		1.504	-1.88213	90.067	1.27044		1.504	-3.91668	91.2979	1.91291		1.504	-10.277	85.7696	1.92261		1.87832	-2.52251	91.2782	1.89584
1.12864	-4.21027	90.0337	1.79595		1.506	-1.86609	90.052	1.26657		1.506	-3.83592	91.1996	1.90194		1.506	-10.319	85.6091	1.88006		1.88113	-2.464	91.2621	1.8642
1.12983	-4.40554	89.8629	1.79878		1.508	-2.06301	89.8671	1.25195		1.508	-3.84643	91.0963	1.91073		1.508	-10.1974	85.5141	1.91018		1.88452	-2.31147	91.2316	1.87033
1.13165	-4.6772	89.8671	1.78981		1.51	-2.0608	90.0609	1.25147		1.51	-4.06493	91.0363	1.8793		1.51	-10.0906	85.5524	1.89441		1.88613	-2.38574	91.1936	1.86865
1.134	-4.79954	89.941	1.78051		1.512	-2.27709	89.876	1.24708		1.512	-4.24748	90.9519	1.8864		1.512	-9.94345	85.4985	1.88125		1.88831	-2.57028	91.078	1.85652
1.13464	-4.97479	89.7453	1.77144		1.514	-2.63001	89.821	1.23697		1.514	-4.31828	91.038	1.88855		1.514	-9.93847	85.5285	1.87398		1.89112	-2.30832	90.9875	1.85596
1.13582	-5.20734	89.6559	1.76464		1.516	-2.60567	89.816	1.23356		1.516	-4.55116	90.8386	1.88859		1.516	-9.86324	85.2886	1.86664		1.89452	-2.30457	91.0176	1.84296
1.13765	-5.41653	89.6113	1.75459		1.518	-2.76222	89.746	1.22476		1.518	-4.38909	90.8091	1.86064		1.518	-9.98328	85.3647	1.862		1.89613	-2.36308	90.8995	1.83044
1.14	-5.60108	89.576	1.74724		1.52	-2.74562	89.7127	1.21232		1.52	-4.6192	90.7725	1.86868		1.52	-9.70171	85.1919	1.8473		1.8983	-2.32271	90.8221	1.83495
1.14063	-5.63378	89.5259	1.74726		1.522	-3.04102	89.6499	1.22089		1.522	-4.81835	90.8791	1.8542		1.522	-9.57836	85.2391	1.85358		1.90112	-2.28029	90.7882	1.81993
1.14182	-5.74247	89.4407	1.73913		1.524	-3.0908	89.6571	1.20641		1.524	-4.78128	90.7725	1.84566		1.524	-9.59883	85.1675	1.82961		1.90452	-2.27639	90.7589	1.82228
1.14364	-6.14175	89.4112	1.71719		1.526	-2.98515	89.5227	1.20732		1.526	-4.89579	90.6875	1.85187		1.526	-9.7432	85.283	1.82654		1.90612	-2.22807	90.6127	1.80419
1.146	-6.47011	89.521	1.70945		1.528	-3.11569	89.6277	1.2028		1.528	-4.93119	90.6858	1.85723		1.528	-9.61708	85.0608	1.81386		1.90829	-2.13142	90.5802	1.8034
1.14663	-6.56534	89.2837	1.71212		1.53	-3.30211	89.5638	1.19582		1.53	-5.0988	90.6497	1.82991		1.53	-9.44947	85.1158	1.80133		1.91111	-1.92273	90.6088	1.79047
1.14781	-6.76587	89.0622	1.70519		1.532	-3.39726	89.4638	1.21112		1.532	-5.05289	90.5814	1.82726		1.532	-9.2708	85.0547	1.79312		1.91451	-1.93735	90.5703	1.79638
1.14964	-6.97168	89.1493	1.69917		1.534	-3.33032	89.2744	1.17287		1.534	-5.21054	90.5925	1.81045		1.534	-9.15795	84.8442	1.80251		1.91611	-1.92165	90.4453	1.77926
1.152	-7.0454	89.1772	1.69322		1.536	-3.27501	89.4122	1.17975		1.536	-5.2725	90.5381	1.80857		1.536	-9.22986	84.9242	1.78007		1.91828	-1.75383	90.3408	1.78166
1.15262	-7.25878	88.914	1.67321		1.538	-3.2136	89.335	1.16322		1.538	-5.09438	90.467	1.79638		1.538	-9.17233	84.8998	1.77734		1.9211	-1.57113	90.302	1.76959
1.15381	-7.51705	88.9159	1.66857		1.54	-3.42989	89.3844	1.16022		1.54	-5.29407	90.2509	1.8025		1.54	-8.90792	85.0442	1.77013		1.92451	-1.65046	90.2789	1.75684
1.15563	-7.57024	88.9879	1.67696		1.542	-3.59031	89.2505	1.16195		1.542	-5.56346	90.3748	1.78882		1.542	-8.90183	84.8192	1.74664		1.9261	-1.46269	90.2543	1.76799
1.158	-7.68818	88.9911	1.67047		1.544	-3.431	89.2761	1.16893		1.544	-5.47496	90.3553	1.77531		1.544	-8.87252	84.7664	1.7522		1.92827	-1.33252	90.1649	1.74798
1.15862	-7.88504	88.9039	1.66539		1.546	-3.4664	89.1239	1.12186		1.546	-5.57342	90.1937	1.7689		1.546	-8.85094	84.637	1.73591		1.9311	-1.4263	90.1849	1.73853
1.1598	-7.92222	88.7309	1.6751		1.548	-3.62903	89.2105	1.1455		1.548	-5.44785	90.1337	1.7574		1.548	-8.82826	84.6626	1.72621		1.93451	-1.50234	90.1125	1.73701
1.16163	-8.06205	88.6857	1.66893		1.55	-3.66554	89.1256	1.13855		1.55	-5.78805	89.9976	1.75391		1.55	-8.5561	84.6343	1.70454		1.9361	-1.43385	89.9696	1.72811
1.164	-8.35973	88.8123	1.65359		1.552	-3.66554	89.0789	1.13409		1.552	-5.64589	90.0298	1.7545		1.552	-8.52236	84.7887	1.70395		1.93826	-1.33701	89.9072	1.72289
1.16461	-8.4762	88.602	1.63846		1.554	-3.66112	88.9567	1.13238		1.554	-5.60938	89.9882	1.74759		1.554	-8.41836	84.6392	1.69934		1.94109	-1.32297	89.8748	1.71399
1.16579	-8.60467	88.5288	1.61007		1.556	-3.71311	88.8967	1.12278		1.556	-5.36709	89.956	1.74213		1.556	-8.25352	84.4954	1.68285		1.94451	-1.30879	89.9647	1.71244
1.16762	-8.86178	88.6089	1.59644		1.558	-3.93715	88.8356	1.12507		1.558	-5.50649	89.8004	1.7282		1.558	-8.18216	84.5098	1.68565		1.94609	-1.07466	89.6497	1.70958
1.17	-9.08217	88.519	1.6115		1.56	-3.89013	88.8234	1.12563		1.56	-5.66635	89.7915	1.73517		1.56	-8.06987	84.3915	1.66061		1.94825	-1.16193	89.6038	1.70734
1.17061	-9.33099	88.3379	1.6099		1.562	-3.80881	88.7351	1.11356		1.562	-5.439	89.7293	1.6986		1.562	-8.11025	84.4071	1.66858		1.95108	-1.00663	89.6578	1.69364
1.17179	-9.49175	88.3148	1.59752		1.564	-3.73911	88.7579	1.11134		1.564	-5.56568	89.766	1.70625		1.564	-7.90945	84.4232	1.64556		1.9545	-0.942487	89.6526	1.68998
1.17362	-9.35846	88.2628	1.59254		1.566	-3.87685	88.7145	1.10969		1.566	-5.517	89.911	1.69922		1.566	-8.04387	84.2893	1.66634		1.95608	-0.796636	89.5294	1.68695
1.176	-9.36926	88.2768	1.58051		1.568	-3.93991	88.7429	1.1006		1.568	-5.50704	89.5721	1.70785		1.568	-7.8923	84.3588	1.63156		1.95825	-0.649813	89.5697	1.6412
1.17661	-9.72057	88.2427	1.57497		1.57	-3.84422	88.6762	1.08169		1.57	-5.51368	89.5666	1.69923		1.57	-7.53219	84.2132	1.63061		1.96107	-0.679236	89.3984	1.66256
1.17778	-9.97419	88.1752	1.59041		1.572	-3.86634	88.4607	1.09511		1.572	-5.58559	89.3744	1.68528		1.572	-7.68542	84.1788	1.61938		1.9645	-0.601775	89.403	1.67559
1.17961	-10.1508	88.0537	1.58437		1.574	-3.83205	88.6607	1.09216		1.574	-5.48491	89.3266	1.6799		1.574	-7.47687	84.0783	1.61876		1.96608	-0.420926	89.3353	1.6591
1.182	-10.3207	87.963	1.55773		1.576	-3.98583	88.4546	1.07103		1.576	-5.56512	89.3133	1.66386		1.576	-7.43041	83.9249	1.59663		1.96824	-0.50341	89.4069	1.63639
1.1826	-10.337	87.8581	1.54874		1.578	-3.9554	88.464	1.0767		1.578	-5.60827	89.3361	1.67866		1.578	-7.24178	84.0227	1.60161		1.97107	-0.395982	89.2149	1.63953
1.18377	-10.4829	87.9213	1.54907		1.58	-4.00076	88.3252	1.07185		1.58	-5.73495	89.2844	1.66838		1.58	-7.1494	83.9794	1.59138		1.9745	-0.396648	89.2655	1.63497
1.18561	-10.6031	87.8494	1.54754		1.582	-4.05221	88.2369	1.05489		1.582	-5.66137	89.2444	1.65592		1.582	-7.16267	83.8994	1.59629		1.97607	-0.223693	89.0613	1.61575
1.188	-10.7439	87.7203	1.54642		1.584	-3.96868	88.3635	1.05017		1.584	-5.55848	89.2744	1.65101		1.584	-6.9923	83.9133	1.56595		1.97823	-0.124083	88.9764	1.63178
1.1886	-10.9887	87.7293	1.53144		1.586	-4.18995	88.2008	1.05122		1.586	-5.54078	89.1322	1.64504		1.586	-6.97349	83.8466	1.55382		1.98106	-0.153345	88.9132	1.62775
1.18977	-10.8033	87.7691	1.51836		1.588	-4.05497	88.1352	1.03998		1.588	-5.56457	89.04	1.6468		1.588	-6.94362	83.7722	1.5515		1.98449	-0.184856	88.9454	1.59786
1.1916	-10.7181	87.6286	1.51265		1.59	-4.01846	88.1319	1.03631		1.59	-5.63095	88.98	1.62381		1.59	-6.95413	83.715	1.54167		1.98606	-0.0216761	88.8629	1.5934
1.194	-11.0476	87.6248	1.50797		1.592	-3.96702	88.1035	1.03115		1.592	-5.44674	88.9134	1.62613		1.592	-6.92204	83.7944	1.53215		1.98822	0.0194671	88.8015	1.59002
1.19459	-11.0674	87.5943	1.50605		1.594	-3.76733	88.0108	1.03894		1.594	-5.32394	88.9045	1.60441		1.594	-6.547	83.5439	1.54338		1.99105	-0.176551	88.7405	1.58243
1.19576	-11.089	87.4759	1.49957		1.596	-3.72141	88.003	1.01449		1.596	-5.42683	88.8989	1.58671		1.596	-6.74614	83.6828	1.51499		1.99449	-0.11179	88.7395	1.57508
1.1976	-11.181	87.4016	1.49058		1.598	-3.7723	87.9502	1.00672		1.598	-5.37151	88.794	1.61075		1.598	-6.60619	83.58	1.50803		1.99605	-0.067964	88.6749	1.5618
1.2	-11.1355	87.5353	1.4926		1.6	-3.86247	87.8964	0.997213		1.6	-5.41909	88.8895	1.59562		1.6	-6.32628	83.5578	1.47536		1.99821	-0.133684	88.5644	1.56353
1.20059	-11.3023	87.537	1.48937		1.602	-3.6838	87.9253	0.996419		1.602	-5.1851	88.7284	1.59106		1.602	-6.69635	83.5484	1.49239		2.00105	-0.0879683	88.6009	1.53931
1.20176	-11.4274	87.4212	1.4735		1.604	-3.71422	87.7736	0.981069		1.604	-5.15633	88.694	1.59157		1.604	-6.63716	83.4762	1.48176		2.00449	-0.0261326	88.5406	1.54273
1.2036	-11.3468	87.2754	1.46166		1.606	-3.67107	87.8147	0.979491		1.606	-4.97987	88.4052	1.58086		1.606	-6.56193	83.4156	1.4968		2.00605	0.322319	88.4744	1.54868
1.206	-11.3286	87.211	1.46496		1.608	-3.74077	87.6897	0.984847		1.608	-4.99978	88.599	1.57145		1.608	-6.51713	83.4462	1.4626		2.0082	0.17352	88.339	1.53844
1.20658	-11.2996	87.1264	1.45989		1.61	-3.61465	87.6753	0.999521		1.61	-5.11152	88.4807	1.55667		1.61	-6.53815	83.3851	1.46397		2.01104	0.145669	88.2884	1.52694
1.20775	-11.3466	87.1454	1.44204		1.612	-3.55491	87.6398	0.963496		1.612	-5.11208	88.4707	1.54518		1.612	-6.56359	83.2912	1.44848		2.01449	0.291564	88.1938	1.51674
1.20959	-11.4483	87.1241	1.44121		1.614	-3.67163	87.4798	0.981724		1.614	-5.02966	88.3668	1.5327		1.614	-6.5647	83.259	1.43749		2.01604	0.0927734	88.2174	1.50936
1.212	-11.4862	87.0921	1.44477		1.616	-3.6849	87.562	0.954168		1.616	-5.00421	88.3702	1.5312		1.616	-6.31135	83.2745	1.44123		2.01819	0.156144	88.2252	1.48762
1.21258	-11.5554	86.9951	1.4247		1.618	-3.45036	87.5559	0.966631		1.618	-4.95166	88.2635	1.51769		1.618	-6.14595	83.2656	1.43715		2.02103	0.215604	88.1235	1.49217
1.21374	-11.6431	86.931	1.41446		1.62	-3.59806	87.5281	0.949617		1.62	-5.05842	88.2669	1.49605		1.62	-6.33679	83.2551	1.40475		2.02448	0.160063	88.0948	1.49658
1.21559	-11.6181	86.917	1.41694		1.622	-3.40389	87.5137	0.949209		1.622	-4.94889	88.168	1.52381		1.622	-6.43138	83.1968	1.41515		2.02603	0.264511	88.044	1.477
1.218	-11.5487	87.0527	1.41031		1.624	-3.3967	87.4292	0.93959		1.624	-4.82554	88.273	1.49815		1.624	-6.55529	83.1484	1.39689		2.02818	0.285919	87.8916	1.48217
1.21857	-11.481	87.015	1.40173		1.626	-3.44538	87.2804	0.928448		1.626	-4.72929	88.0924	1.50072		1.626	-6.27594	83.1362	1.39452		2.03102	0.257217	87.8335	1.46624
1.21974	-11.4069	86.8581	1.39439		1.628	-3.17378	87.2754	0.922791		1.628	-4.74035	88.1458	1.50715		1.628	-6.06906	83.1123	1.36053		2.03448	0.261158	87.9253	1.46519
1.22158	-11.3698	86.8034	1.38904		1.63	-3.12731	87.2721	0.928577		1.63	-4.6878	87.9514	1.50253		1.63	-6.22229	83.0235	1.36324		2.03603	0.30889	87.8702	1.46362
1.224	-11.3662	86.9821	1.3863		1.632	-3.16216	87.2137	0.917177		1.632	-4.44551	88.0408	1.48166		1.632	-6.43581	83.2751	1.35232		2.03817	0.336844	87.7488	1.44889
1.22457	-11.3483	86.9006	1.36921		1.634	-3.07697	87.1471	0.913624		1.634	-4.33377	87.8875	1.47464		1.634	-6.28369	83.0973	1.36029		2.04102	0.337805	87.6655	1.4347
1.22573	-11.3691	86.6148	1.35049		1.636	-3.02774	87.0854	0.874604		1.636	-4.30556	87.873	1.46778		1.636	-6.13267	83.0062	1.34306		2.04448	0.318675	87.6599	1.42413
1.22758	-11.3111	86.613	1.34764		1.638	-3.00727	87.096	0.891296		1.638	-4.34594	87.5253	1.4855		1.638	-6.24165	83.0379	1.3406		2.04602	0.39373	87.6187	1.43971
1.23	-11.2041	86.8244	1.35437		1.64	-3.08803	87.0065	0.894774		1.64	-4.33156	87.7192	1.45111		1.64	-6.28479	82.929	1.32897		2.04816	0.273147	87.5854	1.43665
1.23056	-11.1899	86.6941	1.35176		1.642	-2.91102	86.9738	0.886122		1.642	-4.18054	87.5731	1.45033		1.642	-6.32186	82.9835	1.31858		2.05101	0.387851	87.6105	1.41673
1.23172	-11.1847	86.6423	1.33889		1.644	-2.7683	86.916	0.86564		1.644	-4.16782	87.6181	1.43828		1.644	-6.24275	82.9357	1.29701		2.05448	0.336723	87.4754	1.416
1.23357	-11.1757	86.6677	1.33177		1.646	-2.85349	86.8882	0.855722		1.646	-4.21539	87.4515	1.43802		1.646	-6.30305	82.8268	1.29684		2.05601	0.311153	87.3393	1.40865
1.236	-11.2511	86.6433	1.33018		1.648	-2.70524	86.781	0.87426		1.648	-4.11472	87.4809	1.42753		1.648	-6.3816	82.8929	1.26593		2.05816	0.405806	87.3321	1.40367
1.23656	-11.2336	86.5613	1.31805		1.65	-2.56252	86.7027	0.850451		1.65	-4.07157	87.3331	1.42179		1.65	-6.46955	82.7896	1.26376		2.061	0.453225	87.4325	1.38577
1.23772	-11.1675	86.4726	1.30733		1.652	-2.53265	86.6355	0.840908		1.652	-3.77839	87.4181	1.41312		1.652	-6.27871	82.8718	1.26863		2.06447	0.356837	87.3559	1.39058
1.23957	-11.247	86.4975	1.30622		1.654	-2.41151	86.6688	0.85014		1.654	-3.76511	87.2848	1.40534		1.654	-6.17582	82.7996	1.27319		2.066	0.156093	87.3691	1.3624
1.242	-11.2605	86.6766	1.3028		1.656	-2.4718	86.535	0.83714		1.656	-3.7463	87.1948	1.39765		1.656	-6.12438	82.7008	1.24595		2.06815	0.309302	87.0991	1.36591
1.24256	-11.0832	86.5307	1.28934		1.658	-2.45355	86.6755	0.839083		1.658	-3.70537	87.1921	1.40222		1.658	-6.25216	82.7035	1.23849		2.07099	0.330927	87.1116	1.3664
1.24371	-11.0648	86.4183	1.27923		1.66	-2.39657	86.3656	0.832417		1.66	-3.63567	87.1499	1.39087		1.66	-6.22229	82.5308	1.23843		2.07447	0.159763	87.1322	1.35609
1.24556	-11.1087	86.4907	1.28081		1.662	-2.27764	86.5416	0.815296		1.662	-3.39117	87.0465	1.37984		1.662	-6.12714	82.6769	1.22906		2.076	0.073505	87.0913	1.34361
1.248	-10.9757	86.5411	1.28282		1.664	-2.21237	86.4672	0.824806		1.664	-3.4404	87.0493	1.395		1.664	-6.22007	82.6519	1.2122		2.07814	0.187959	86.9742	1.34769
1.24855	-10.8842	86.4303	1.26903		1.666	-2.21016	86.3561	0.828735		1.666	-3.33973	87.0004	1.33997		1.666	-6.47121	82.7885	1.21481		2.08099	0.207158	86.9407	1.34026
1.24971	-10.8551	86.3646	1.25376		1.668	-2.06025	86.2556	0.805398		1.668	-3.31871	86.9449	1.35275		1.668	-6.51325	82.6435	1.21055		2.08447	0.2127	86.8479	1.30776
1.25156	-10.6456	86.3271	1.25214		1.67	-1.80192	86.3011	0.802285		1.67	-3.19535	86.9043	1.35205		1.67	-6.5304	82.6463	1.18626		2.08599	0.114026	86.868	1.31511
1.254	-10.3943	86.4044	1.24828		1.672	-1.80358	86.2328	0.794428		1.672	-3.0305	86.9782	1.33144		1.672	-6.2953	82.6508	1.19227		2.08813	0.0304145	86.7615	1.30513
1.25455	-10.3422	86.3819	1.2323		1.674	-1.75435	86.1645	0.796897		1.674	-3.01612	86.7333	1.33559		1.674	-6.1902	82.4958	1.1844		2.09098	0.166414	86.8164	1.32067
1.2557	-10.3975	86.2553	1.22685		1.676	-1.7029	86.1628	0.78321		1.676	-2.78988	86.9016	1.33711		1.676	-6.53981	82.5958	1.16707		2.09447	-0.00640618	86.7351	1.30808
1.25755	-10.2875	86.1285	1.22616		1.678	-1.65035	86.1034	0.775846		1.678	-2.95527	86.7149	1.33756		1.678	-6.41645	82.4486	1.16099		2.09598	0.171305	86.6644	1.29633
1.26	-10.1586	86.2039	1.21216		1.68	-1.33947	86.009	0.791583		1.68	-2.71575	86.5844	1.33304		1.68	-6.42917	82.603	1.15431		2.09812	0.00710757	86.6215	1.29552
1.26054	-10.0772	86.2016	1.19796		1.682	-1.46338	85.9323	0.769491		1.682	-2.78545	86.4805	1.31193		1.682	-6.40981	82.378	1.13493		2.10097	-0.0323346	86.4657	1.27795
1.26169	-9.86833	86.1113	1.19838		1.684	-1.4667	86.0656	0.769567		1.684	-2.48951	86.5011	1.29775		1.684	-6.6792	82.4908	1.14384		2.10446	0.120184	86.4602	1.27666
1.26355	-9.77752	86.0181	1.19984		1.686	-1.24764	85.9173	0.752166		1.686	-2.60069	86.5305	1.30149		1.686	-6.57521	82.4386	1.11402		2.10597	0.0862661	86.4795	1.26262
1.266	-9.80848	86.1151	1.19524		1.688	-1.01642	85.939	0.766056		1.688	-2.57857	86.4555	1.29116		1.688	-6.47398	82.3614	1.1212		2.10811	-0.00632376	86.3544	1.26306
1.26654	-9.66954	86.0708	1.18235		1.69	-1.02803	85.7263	0.757555		1.69	-2.29977	86.3322	1.28938		1.69	-6.42972	82.4025	1.11457		2.11097	-0.0975385	86.4024	1.25526
1.26769	-9.613	85.8691	1.16789		1.692	-1.05237	85.8012	0.734304		1.692	-2.40874	86.4117	1.26898		1.692	-6.60619	82.4247	1.11364		2.11446	0.0230282	86.3659	1.24014
1.26955	-9.52228	85.8708	1.16978		1.694	-0.901912	85.7768	0.743761		1.694	-2.24279	86.4106	1.27798		1.694	-6.60065	82.3847	1.12328		2.11597	-0.0692505	86.2395	1.2566
1.272	-9.23318	85.9462	1.17733		1.696	-0.755876	85.8346	0.725555		1.696	-2.28649	86.2884	1.26534		1.696	-6.47896	82.4386	1.09235		2.1181	-0.253847	86.2625	1.22904
1.27253	-9.08105	85.6839	1.16489		1.698	-0.690602	85.7263	0.707918		1.698	-2.04476	86.2073	1.2608		1.698	-6.51159	82.3886	1.08108		2.12096	-0.0204345	86.1041	1.22935
1.27368	-9.01979	85.6988	1.15003		1.7	-0.675113	85.6563	0.725469		1.7	-2.21071	86.3211	1.25732		1.7	-6.42751	82.3708	1.09521		2.12446	-0.144279	86.1299	1.23355
1.27554	-8.89303	85.7704	1.1405		1.702	-0.546778	85.6557	0.722066		1.702	-2.02429	86.1378	1.23247		1.702	-6.3733	82.2981	1.05538		2.12596	-0.345544	86.0029	1.2122
1.278	-8.79618	85.7179	1.13238		1.704	-0.593797	85.649	0.721111		1.704	-2.01102	86.0667	1.239		1.704	-6.45628	82.3225	1.05201		2.12809	-0.108283	86.0158	1.22467
1.27853	-8.68632	85.7503	1.1294		1.706	-0.479845	85.6513	0.705514		1.706	-1.93523	86.1273	1.22948		1.706	-6.40926	82.5647	1.05622		2.13095	-0.00246357	85.9991	1.21239
1.27967	-8.61514	85.6941	1.12388		1.708	-0.291767	85.478	0.710623		1.708	-1.78975	86.0323	1.21905		1.708	-6.36611	82.3336	1.04359		2.13446	-0.195911	85.9558	1.19688
1.28154	-8.55619	85.5585	1.11427		1.71	-0.375849	85.4852	0.701617		1.71	-1.63375	85.9151	1.18784		1.71	-6.23446	82.3569	1.03043		2.13595	-0.240336	85.8614	1.18493
1.284	-8.43551	85.634	1.10525		1.712	-0.327723	85.5185	0.701403		1.712	-1.65975	85.9195	1.20898		1.712	-6.47398	82.4536	1.02713		2.13808	-0.111095	85.8276	1.17646
1.28452	-8.32582	85.5509	1.09764		1.714	-0.233132	85.3924	0.688167		1.714	-1.45951	85.7429	1.2172		1.714	-6.55861	82.3897	1.00754		2.14094	0.00620401	85.8391	1.18307
1.28567	-8.24592	85.574	1.10325		1.716	0.00196513	85.3108	0.66322		1.716	-1.38925	85.8768	1.21507		1.716	-6.47177	82.4469	1.01891		2.14445	-0.0642052	85.8966	1.17452
1.28753	-8.0817	85.6207	1.10374		1.718	-0.0920735	85.3447	0.667578		1.718	-1.28249	85.7518	1.1946		1.718	-6.29752	82.3542	0.990708		2.14595	-0.00881418	85.8504	1.16037
1.29	-7.86907	85.528	1.08648		1.72	-0.0251401	85.2047	0.667954		1.72	-1.08612	85.9007	1.1951		1.72	-6.15812	82.3442	0.988937		2.14807	0.178263	85.6372	1.16039
1.29052	-7.71878	85.4231	1.07469		1.722	0.154087	85.2414	0.663177		1.722	-1.24875	85.6352	1.19598		1.722	-6.12382	82.4086	0.985803		2.15094	0.138631	85.7443	1.1369
1.29166	-7.6389	85.4083	1.07524		1.724	0.250891	85.1225	0.638123		1.724	-1.07616	85.6046	1.17285		1.724	-6.22561	82.3675	0.979748		2.15445	0.146109	85.6952	1.14024
1.29353	-7.55509	85.3199	1.07124		1.726	0.373694	85.0714	0.6562		1.726	-0.990419	85.6002	1.18186		1.726	-6.10723	82.3369	0.965815		2.15594	0.151853	85.6608	1.13543
1.296	-7.44092	85.3958	1.06596		1.728	0.272465	85.1292	0.661653		1.728	-0.877573	85.5968	1.15328		1.728	-6.2859	82.3075	0.954308		2.15807	0.116848	85.6859	1.13441
1.29652	-7.34632	85.4061	1.05342		1.73	0.373694	84.9297	0.633646		1.73	-0.73043	85.5396	1.15173		1.73	-6.00379	82.4264	0.928716		2.16093	0.082225	85.5461	1.1318
1.29766	-7.29829	85.2556	1.0326		1.732	0.365397	84.9786	0.627388		1.732	-0.687283	85.5141	1.14311		1.732	-5.77975	82.3042	0.940396		2.16445	0.101792	85.5713	1.12393
1.29952	-7.11983	85.1927	1.03069		1.734	0.567304	84.9553	0.605329		1.734	-0.705538	85.4774	1.13186		1.734	-5.97391	82.3936	0.94368		2.16593	0.334722	85.4691	1.09786
1.302	-6.86562	85.2497	1.03573		1.736	0.788571	84.9609	0.614818		1.736	-0.61869	85.3808	1.13654		1.736	-5.9009	82.3653	0.93608		2.16806	0.50242	85.464	1.12132
1.30251	-6.72759	85.0934	1.02122		1.738	0.732701	84.7514	0.618393		1.738	-0.404614	85.3163	1.12724		1.738	-5.66137	82.353	0.920021		2.17092	0.352187	85.4643	1.09427
1.30365	-6.57746	85.1295	1.01935		1.74	0.628705	84.8564	0.61865		1.74	-0.373636	85.2508	1.11919		1.74	-5.465	82.2842	0.898799		2.17445	0.365722	85.4236	1.06998
1.30552	-6.32413	85.2189	1.02534		1.742	0.947884	84.777	0.599307		1.742	-0.475419	85.2513	1.11578		1.742	-5.53746	82.2825	0.898488		2.17592	0.474131	85.2609	1.09478
1.308	-6.08676	85.2314	1.01008		1.744	0.873206	84.7381	0.594068		1.744	-0.532949	85.2525	1.10987		1.744	-5.48768	82.1753	0.887195		2.17805	0.596119	85.349	1.09363
1.30851	-5.95088	85.2135	1.00558		1.746	0.873206	84.687	0.577194		1.746	-0.279045	85.238	1.09878		1.746	-5.25369	82.3397	0.888784		2.18091	0.7062	85.3123	1.08325
1.30964	-5.91437	85.1084	1.01587		1.748	0.974436	84.6654	0.575916		1.748	0.0445591	85.1025	1.10452		1.748	-5.05842	82.2547	0.865598		2.18444	0.668831	85.3463	1.06099
1.31151	-5.74858	85.0085	0.991609		1.75	1.00873	84.6054	0.590848		1.75	0.110939	85.0597	1.07608		1.75	-4.86924	82.3003	0.860241		2.18592	0.585336	85.2165	1.05655
1.314	-5.52308	85.1753	0.970055		1.752	1.02367	84.6704	0.56296		1.752	0.00639049	85.148	1.08116		1.752	-4.92787	82.277	0.848637		2.18804	0.746805	85.1926	1.06181
1.3145	-5.44682	85.1047	0.978814		1.754	1.21838	84.592	0.568585		1.754	0.246466	85.0408	1.06727		1.754	-4.93562	82.393	0.8592		2.19091	0.791169	85.1503	1.06054
1.31564	-5.31082	84.9015	0.963564		1.756	1.16417	84.5348	0.583345		1.756	0.390843	85.0286	1.07183		1.756	-4.73924	82.3192	0.837656		2.19444	0.886211	85.1532	1.03968
1.31751	-5.09354	84.8805	0.949968		1.758	1.39318	84.552	0.556691		1.758	0.533007	85.0658	1.05265		1.758	-4.7315	82.3203	0.827511		2.19591	0.894044	85.101	1.03853
1.32	-4.97489	85.0269	0.963088		1.76	1.5619	84.5098	0.561307		1.76	0.541858	84.9697	1.05947		1.76	-4.63967	82.2786	0.822337		2.19803	0.822855	85.1831	1.02054
1.3205	-4.83111	84.9847	0.949283		1.762	1.64598	84.4587	0.565257		1.762	0.500923	84.852	1.06599		1.762	-4.383	82.3764	0.810111		2.2009	0.968003	84.9446	1.03001
1.32163	-4.63484	84.9201	0.934631		1.764	1.48446	84.4909	0.558752		1.764	0.703936	84.8942	1.067		1.764	-4.48313	82.373	0.812601		2.20444	1.20637	85.0274	0.996229
1.3235	-4.44877	84.9397	0.940719		1.766	1.64322	84.271	0.549821		1.766	0.700617	84.8175	1.02215		1.766	-4.23862	82.2142	0.823132		2.2059	1.22618	84.9261	1.00948
1.326	-4.30279	84.9797	0.932162		1.768	1.73615	84.4243	0.546826		1.768	0.716659	84.8159	1.02811		1.768	-4.15067	82.2453	0.790832		2.20802	1.29787	84.8883	1.00059
1.32649	-4.16512	84.8249	0.922315		1.77	1.81691	84.3015	0.531701		1.77	0.816229	84.8925	1.02836		1.77	-4.25688	82.2314	0.777199		2.21089	1.24666	84.9099	0.995205
1.32763	-3.94635	84.7472	0.922736		1.772	2.04095	84.4443	0.521847		1.772	0.833378	84.8653	1.01457		1.772	-3.9117	82.3047	0.783382		2.21444	1.51543	84.8777	0.990291
1.3295	-3.74764	84.7779	0.908222		1.774	1.96959	84.3288	0.518036		1.774	0.972223	84.762	1.0298		1.774	-3.78171	82.3675	0.767978		2.21589	1.63824	84.8226	0.989098
1.332	-3.64673	84.8059	0.901408		1.776	2.21907	84.2249	0.529511		1.776	1.18243	84.7592	1.02407		1.776	-3.50402	82.2431	0.759777		2.21801	1.68578	84.7369	0.958986
1.33249	-3.48635	84.7148	0.903935		1.778	2.41157	84.356	0.509137		1.778	1.17302	84.6754	1.01249		1.778	-3.56265	82.348	0.76289		2.22089	1.6455	84.7558	0.978292
1.33362	-3.21766	84.7039	0.882448		1.78	2.36731	84.216	0.514966		1.78	1.13596	84.6404	0.981723		1.78	-3.64176	82.3575	0.762868		2.22443	1.77122	84.7332	0.969024
1.3355	-2.93073	84.6228	0.875785		1.782	2.37285	84.1888	0.487389		1.782	1.35336	84.7681	0.997439		1.782	-3.24016	82.3119	0.736751		2.22589	1.8904	84.807	0.96703
1.338	-2.8203	84.7181	0.888537		1.784	2.51722	84.306	0.487625		1.784	1.37272	84.6087	0.967758		1.784	-3.03991	82.4219	0.723118		2.228	1.84333	84.6583	0.946008
1.33848	-2.91489	84.8596	0.868586		1.786	2.62011	84.161	0.479091		1.786	1.42306	84.7159	0.972653		1.786	-2.9857	82.4125	0.726403		2.23088	1.96448	84.5843	0.945353
1.33961	-2.89292	84.6935	0.857469		1.788	2.92491	84.1566	0.493379		1.788	1.47118	84.5887	0.958236		1.788	-3.0565	82.2986	0.704999		2.23443	2.10742	84.6769	0.936132
1.34149	-2.58147	84.5222	0.864473		1.79	2.72798	84.0938	0.485221		1.79	1.44352	84.4904	0.96911		1.79	-2.69639	82.4547	0.712684		2.23588	2.04316	84.5426	0.947931
1.344	-2.12773	84.6592	0.845266		1.792	2.85244	84.0433	0.482569		1.792	1.75219	84.471	0.948307		1.792	-2.52823	82.2947	0.696883		2.23799	2.26659	84.5357	0.938422
1.34448	-1.77359	84.5304	0.841188		1.794	2.90831	84.0499	0.462786		1.794	1.60781	84.361	0.956358		1.794	-2.46904	82.4419	0.706781		2.24087	2.31258	84.6206	0.933283
1.34561	-1.71931	84.4082	0.870391		1.796	2.97912	84.016	0.46504		1.796	1.87997	84.4282	0.932516		1.796	-2.39602	82.2864	0.676874		2.24443	2.2842	84.5512	0.930599
1.34749	-1.77025	84.439	0.861107		1.798	3.10026	84.0138	0.454992		1.798	1.86836	84.3082	0.929371		1.798	-2.32356	82.3597	0.649168		2.24587	2.47398	84.5048	0.918102
1.35	-1.62822	84.4521	0.825053		1.8	3.09086	84.0199	0.448852		1.8	1.9895	84.3471	0.928802		1.8	-2.03148	82.4508	0.672376		2.24799	2.63076	84.3648	0.899636
1.35047	-1.30116	84.3701	0.815703		1.802	3.17826	83.9061	0.448079		1.802	1.94857	84.3832	0.921739		1.802	-2.0348	82.3475	0.67462		2.25086	2.41625	84.4045	0.898208
1.3516	-0.985203	84.3367	0.814279		1.804	3.29	83.8711	0.431215		1.804	2.05975	84.3143	0.923199		1.804	-1.81907	82.4047	0.677776		2.25443	2.60241	84.4416	0.889527
1.35348	-0.865659	84.306	0.819407		1.806	3.15281	83.8283	0.453586		1.806	2.17537	84.1899	0.909727		1.806	-1.71562	82.1325	0.670788		2.25587	2.86234	84.4051	0.900181
1.356	-0.757535	84.2921	0.813846		1.808	3.238	83.8855	0.433373		1.808	2.18643	84.2271	0.898746		1.808	-1.71175	82.2686	0.655727		2.25798	2.91868	84.3306	0.905007
1.35647	-0.519071	84.1355	0.780595		1.81	3.30217	83.7839	0.425247		1.81	2.4254	84.2032	0.908729		1.81	-1.42189	82.2864	0.636341		2.26086	2.94488	84.3	0.882068
1.35759	-0.392974	84.1151	0.785898		1.812	3.44821	83.69	0.433319		1.812	2.28213	84.2343	0.889847		1.812	-1.28249	82.3247	0.638337		2.26442	3.03041	84.3234	0.893353
1.35948	-0.244794	84.1654	0.799325		1.814	3.54778	83.7133	0.407836		1.814	2.52773	84.121	0.886616		1.814	-1.07118	82.3853	0.624157		2.26586	3.20429	84.2184	0.860616
1.362	0.0827278	84.1543	0.779732		1.816	3.48416	83.7789	0.429165		1.816	2.55429	84.1294	0.890351		1.816	-1.05182	82.3081	0.617652		2.26797	3.33521	84.1673	0.868089
1.36247	0.299677	84.0365	0.778017		1.818	3.46591	83.725	0.41375		1.818	2.55097	84.0821	0.878618		1.818	-0.928464	82.2558	0.602881		2.27085	3.31737	84.1392	0.853424
1.36359	0.449287	84.0397	0.778352		1.82	3.58207	83.595	0.428145		1.82	2.65496	84.0549	0.860252		1.82	-0.696687	82.3414	0.587069		2.27442	3.28222	84.1764	0.853976
1.36547	0.733727	84.0522	0.768551		1.822	3.67998	83.6289	0.404014		1.822	2.77223	84.2288	0.86271		1.822	-0.520226	82.3597	0.599436		2.27585	3.58817	84.1594	0.852858
1.368	0.931289	84.0227	0.762256		1.824	3.62799	83.51	0.401878		1.824	3.05158	84.091	0.860477		1.824	-0.464356	82.2153	0.582647		2.27796	3.60594	84.0673	0.842691
1.36846	0.997208	83.8686	0.746785		1.826	3.70764	83.5861	0.39285		1.826	2.76892	83.9494	0.862399		1.826	-0.166751	82.1603	0.584085		2.28084	3.61998	84.0714	0.859395
1.36958	1.13949	83.8623	0.747949		1.828	3.7176	83.6061	0.386904		1.828	2.827	84.0172	0.834929		1.828	0.044006	82.237	0.554565		2.28442	3.78075	84.0125	0.83333
1.37147	1.26257	83.9856	0.746771		1.83	3.75798	83.6056	0.381987		1.83	3.11077	83.8838	0.842958		1.83	0.115365	82.2703	0.574939		2.28584	3.97637	83.9196	0.833598
1.374	1.44131	84.0438	0.727198		1.832	3.94606	83.5067	0.382728		1.832	3.17715	83.8772	0.852544		1.832	0.188383	82.2214	0.554619		2.28795	3.99653	83.9618	0.820475
1.37446	1.82939	83.8169	0.725198		1.834	4.14575	83.5772	0.388997		1.834	3.13622	83.8561	0.808587		1.834	0.393609	82.242	0.545849		2.29083	4.12166	84.0043	0.816261
1.37558	2.08323	83.7135	0.728922		1.836	4.11146	83.6506	0.375826		1.836	3.18711	83.8772	0.839191		1.836	0.756487	82.1853	0.56369		2.29442	4.19042	83.9095	0.805582
1.37746	2.14076	83.8423	0.727557		1.838	4.06112	83.4945	0.372272		1.838	3.38459	83.8533	0.821811		1.838	0.780827	82.1831	0.528126		2.29584	4.4028	83.8242	0.808078
1.38	2.31421	83.9016	0.729591		1.84	4.1629	83.5156	0.351576		1.84	3.6396	83.8505	0.816476		1.84	0.898098	82.1214	0.506786		2.29794	4.39754	83.8878	0.799958
1.38045	2.50861	83.7447	0.725947		1.842	4.3106	83.4606	0.365735		1.842	3.74415	83.8483	0.815993		1.842	1.10996	82.1725	0.528556		2.30083	4.34096	83.8708	0.787076
1.38157	2.68512	83.7896	0.72507		1.844	4.48042	83.5478	0.368784		1.844	3.59148	83.7633	0.809639		1.844	1.41808	82.0337	0.542006		2.30441	4.44356	83.8911	0.790213
1.38346	3.04294	83.7692	0.713603		1.846	4.25639	83.4406	0.353262		1.846	3.81828	83.69	0.805967		1.846	1.37438	82.1164	0.511305		2.30583	4.54507	83.8452	0.777133
1.386	3.33149	83.7361	0.690228		1.848	4.40464	83.4123	0.341261		1.848	4.0921	83.6856	0.785582		1.848	1.4402	82.202	0.503705		2.30793	4.67258	83.793	0.779489
1.38645	3.33966	83.815	0.684742		1.85	4.43561	83.3934	0.347916		1.85	4.01355	83.8266	0.804905		1.85	1.60062	82.2036	0.500603		2.31082	4.76123	83.7856	0.780886
1.38756	3.41472	83.7803	0.68489		1.852	4.58718	83.3778	0.331868		1.852	4.11035	83.7289	0.795512		1.852	1.83351	82.1342	0.498005		2.31441	4.97851	83.7672	0.749806
1.38946	3.61546	83.6656	0.673089		1.854	4.84994	83.364	0.341819		1.854	4.17894	83.77	0.774043		1.854	1.88661	82.0076	0.494302		2.31582	4.86642	83.7647	0.756682
1.392	3.86087	83.7705	0.67331		1.856	4.75203	83.2506	0.335893		1.856	4.27575	83.725	0.775514		1.856	2.15379	82.0748	0.470611		2.31792	4.82177	83.7816	0.745951
1.39244	4.12724	83.6831	0.682162		1.858	4.75479	83.2662	0.325728		1.858	4.25805	83.7155	0.774891		1.858	2.27494	82.177	0.464718		2.32081	5.01666	83.6233	0.769828
1.39356	4.25873	83.5918	0.673891		1.86	4.92406	83.3067	0.320167		1.86	4.32221	83.6694	0.781976		1.86	2.41489	82.0787	0.46417		2.32441	5.08236	83.7037	0.745867
1.39545	4.52324	83.6393	0.657747		1.862	4.92793	83.2956	0.315895		1.862	4.40519	83.6406	0.757351		1.862	2.4951	82.0203	0.451643		2.32581	5.22996	83.6927	0.766339
1.398	4.83555	83.675	0.652196		1.864	4.90636	83.1657	0.316002		1.864	4.69173	83.6006	0.754689		1.864	2.68151	82.1764	0.456001		2.32791	5.30723	83.6223	0.739856
1.39844	4.81038	83.5523	0.647483		1.866	5.24103	83.2762	0.292247		1.866	4.88091	83.595	0.764199		1.866	3.03388	82.0759	0.456882		2.33081	5.29	83.6697	0.733774
1.39955	4.95222	83.5081	0.638307		1.868	5.27422	83.2579	0.315863		1.868	4.85989	83.6739	0.752016		1.868	3.0278	82.092	0.431956		2.33441	5.34625	83.5487	0.728798
1.40145	5.32162	83.5192	0.626991		1.87	5.24379	83.1718	0.302992		1.87	4.86155	83.6161	0.761827		1.87	3.11188	82.0626	0.438848		2.33581	5.55291	83.5556	0.722712
1.404	5.45842	83.55	0.622193		1.872	5.1752	83.1968	0.299482		1.872	4.79241	83.6106	0.746563		1.872	3.22196	82.0164	0.425172		2.3379	5.4991	83.5218	0.711922
1.40443	5.50233	83.4914	0.627125		1.874	5.48055	83.1712	0.289402		1.874	4.94729	83.4078	0.755107		1.874	3.42387	82.0303	0.427931		2.3408	5.83942	83.4713	0.715117
1.40554	5.65978	83.5357	0.624083		1.876	5.53642	83.1257	0.294759		1.876	5.13537	83.5061	0.727401		1.876	3.55773	82.1809	0.431398		2.3444	5.85246	83.619	0.711177
1.40744	5.96938	83.5602	0.606541		1.878	5.48774	83.1701	0.304431		1.878	5.08282	83.4739	0.733316		1.878	3.59258	81.9992	0.412559		2.3458	5.6301	83.4895	0.705702
1.41	6.22014	83.5767	0.599693		1.88	5.38319	83.0374	0.27227		1.88	5.09997	83.5073	0.714584		1.88	3.66505	81.9326	0.394267		2.3479	5.87096	83.5323	0.691278
1.41043	6.30715	83.4433	0.611356		1.882	5.48166	82.999	0.27782		1.882	5.27256	83.3017	0.724718		1.882	3.93997	81.9598	0.398937		2.35079	5.96613	83.4187	0.676352
1.41154	6.52233	83.2407	0.614715		1.884	5.76875	82.9379	0.256394		1.884	5.31736	83.4262	0.710259		1.884	4.36149	81.8237	0.400944		2.3544	6.05298	83.5241	0.692952
1.41344	6.63657	83.2051	0.593066		1.886	5.60667	83.0585	0.274299		1.886	5.56352	83.3984	0.725362		1.886	4.45165	81.9215	0.378123		2.35579	5.78971	83.3685	0.695825
1.416	6.67429	83.3623	0.573512		1.888	5.66973	83.0096	0.274009		1.888	5.51982	83.3129	0.697495		1.888	4.30672	81.9304	0.378026		2.35789	6.03929	83.2131	0.690559
1.41642	7.02591	83.3108	0.584355		1.89	5.85339	83.0079	0.251531		1.89	5.66475	83.3578	0.707629		1.89	4.49259	81.9337	0.356579		2.36078	6.16846	83.378	0.677149
1.41753	7.28873	83.2987	0.603133		1.892	6.05031	83.0379	0.268212		1.892	5.79696	83.4389	0.705439		1.892	4.67403	81.9342	0.374248		2.3644	6.16209	83.3608	0.679304
1.41943	7.2952	83.2848	0.589267		1.894	5.93415	82.9135	0.259131		1.894	5.8567	83.2851	0.681919		1.894	4.83611	81.9165	0.36537		2.36579	6.28781	83.4234	0.677114
1.422	7.43102	83.3012	0.57188		1.896	5.9513	83.0324	0.248998		1.896	5.8473	83.4028	0.69026		1.896	4.92683	81.902	0.363384		2.36788	6.26489	83.3906	0.662405
1.42242	7.61057	83.3179	0.578585		1.898	6.12886	82.9379	0.251252		1.898	5.8993	83.3739	0.66352		1.898	4.9921	81.8509	0.360057		2.37078	6.28992	83.3599	0.664221
1.42353	7.71339	83.2237	0.575025		1.9	6.15763	82.9474	0.243469		1.9	5.96955	83.2629	0.647107		1.9	5.17077	81.867	0.338545		2.3744	6.29377	83.3889	0.649465
1.42543	7.79203	83.125	0.564558		1.902	6.37724	82.808	0.234002		1.902	6.22124	83.229	0.680986		1.902	5.42579	81.6149	0.343729		2.37578	6.5175	83.2759	0.650126
1.428	7.91173	83.2168	0.566781		1.904	6.35345	82.8463	0.246819		1.904	6.16537	83.2007	0.685022		1.904	5.34945	81.947	0.338867		2.37787	6.34509	83.2038	0.64991
1.42842	8.11544	83.1452	0.564276		1.906	6.24392	82.8746	0.232681		1.906	6.25499	83.2062	0.661674		1.906	5.58454	81.8437	0.325835		2.38077	6.4992	83.2387	0.622005
1.42952	8.37329	83.1273	0.564078		1.908	6.41153	82.7885	0.231801		1.908	6.24558	83.2073	0.652861		1.908	5.70569	81.8898	0.328723		2.38439	6.62256	83.1637	0.63694
1.43142	8.64253	83.1355	0.561936		1.91	6.65659	82.7913	0.221679		1.91	6.54042	83.1196	0.658379		1.91	5.79862	81.8232	0.323957		2.38577	6.44452	83.1701	0.639369
1.434	8.80786	83.1118	0.54498		1.912	6.64718	82.7563	0.232928		1.912	6.44859	83.2107	0.659248		1.912	5.89653	81.7248	0.314553		2.38786	6.54509	83.2156	0.624181
1.43441	8.77168	83.0634	0.534885		1.914	6.60348	82.7163	0.212286		1.914	6.64995	83.2173	0.642116		1.914	6.10729	81.7076	0.308767		2.39076	6.74374	83.113	0.626878
1.43551	8.77041	83.0411	0.534309		1.916	6.50723	82.8113	0.226734		1.916	6.93206	83.1001	0.656178		1.916	6.29481	81.8959	0.295414		2.39439	6.6327	83.2356	0.626249
1.43742	8.98698	82.9897	0.523564		1.918	6.71633	82.673	0.188284		1.918	6.88449	83.1157	0.657939		1.918	6.27435	81.8082	0.298183		2.39576	6.68976	83.1431	0.621481
1.44	9.27252	83.0596	0.518165		1.92	6.8773	82.7419	0.212866		1.92	6.89002	83.1329	0.587402		1.92	6.30035	81.7959	0.311193		2.39785	6.70662	83.2343	0.598188
1.44041	9.45153	83.025	0.525607		1.922	6.78603	82.8157	0.188938		1.922	6.97908	83.069	0.627603		1.922	6.4403	81.8226	0.286837		2.40075	6.63936	83.0238	0.617369
1.44151	9.58527	82.9637	0.524071		1.924	6.69973	82.708	0.209473		1.924	7.00896	83.0573	0.632144		1.924	6.61565	81.8148	0.287245		2.40439	6.53693	83.1314	0.605437
1.44341	9.70114	82.9564	0.514456		1.926	6.84024	82.7891	0.204203		1.926	7.19537	83.1545	0.629213		1.926	6.51829	81.852	0.279387		2.40576	6.65853	83.1279	0.607547
1.446	9.80246	82.9585	0.510178		1.928	6.92377	82.7152	0.201025		1.928	7.38898	83.0685	0.623577		1.928	6.73624	81.8365	0.277916		2.40784	6.93558	83.0802	0.600634
1.4464	9.87891	82.8552	0.507506		1.93	6.95198	82.7307	0.201841		1.93	7.4183	83.0673	0.606789		1.93	6.90828	81.8237	0.273966		2.41075	6.87033	83.0557	0.593991
1.4475	9.97804	82.9063	0.514481		1.932	7.15278	82.8091	0.195851		1.932	7.29273	83.0507	0.630254		1.932	6.97798	81.872	0.27548		2.41439	6.68456	82.9996	0.594196
1.44941	10.182	82.8684	0.52228		1.934	7.12899	82.643	0.190323		1.934	7.43324	83.0468	0.606477		1.934	7.13729	81.8531	0.271379		2.41575	7.06199	83.0544	0.599121
1.452	10.3125	82.8379	0.504371		1.936	7.22469	82.6502	0.18765		1.936	7.66004	83.0546	0.610031		1.936	7.31099	81.8254	0.264981		2.41783	6.96208	83.0242	0.58541
1.4524	10.3196	82.865	0.487665		1.938	7.14725	82.5802	0.191515		1.938	7.81879	83.0318	0.608657		1.938	7.35303	81.7987	0.25999		2.42074	6.70839	83.011	0.581071
1.45349	10.5347	82.8138	0.502409		1.94	7.22635	82.7313	0.198374		1.94	7.73582	83.169	0.60271		1.94	7.26341	81.8543	0.234055		2.42438	6.97688	83.1367	0.571123
1.45541	10.7439	82.8304	0.502747		1.942	7.24958	82.5852	0.189089		1.942	7.6285	83.0024	0.595582		1.942	7.44872	81.8798	0.230534		2.42574	7.06571	83.0378	0.574441
1.458	10.7578	83.0657	0.480154		1.944	7.34473	82.518	0.201337		1.944	7.81548	82.9924	0.609869		1.944	7.74744	81.9098	0.2502		2.42782	6.84056	82.9692	0.575716
1.45839	10.9142	82.8786	0.483428		1.946	7.21584	82.6335	0.196818		1.946	8.08487	83.0751	0.609322		1.946	7.90011	81.8359	0.235666		2.43073	6.89127	82.9702	0.578715
1.45949	11.1453	82.6332	0.491194		1.948	7.3309	82.6135	0.160707		1.948	8.11142	82.9557	0.587875		1.948	7.70705	81.8726	0.262834		2.43438	7.02027	82.9771	0.535134
1.4614	11.2174	82.8482	0.471262		1.95	7.49021	82.5258	0.173975		1.95	7.91671	82.7968	0.595238		1.95	7.81824	81.7743	0.229568		2.43573	7.01159	82.8963	0.551373
1.464	11.3834	82.9435	0.471148		1.952	7.46864	82.5291	0.173749		1.952	8.08929	82.899	0.57728		1.952	7.94658	81.942	0.230191		2.43782	6.96842	82.9332	0.557539
1.46439	11.6462	82.6492	0.49043		1.954	7.49132	82.4608	0.14015		1.954	8.16287	82.9518	0.580414		1.954	8.14738	81.9054	0.226831		2.44073	7.02234	82.8928	0.551866
1.46548	11.7121	82.8015	0.474658		1.956	7.35247	82.6135	0.166074		1.956	8.23257	82.944	0.564538		1.956	8.05721	81.8959	0.196732		2.44438	6.91669	82.9683	0.555872
1.4674	11.6596	82.8318	0.451029		1.958	7.6357	82.493	0.160964		1.958	8.41898	82.9613	0.571419		1.958	8.04283	81.9265	0.240013		2.44573	7.09703	82.9041	0.554687
1.47	11.774	82.6174	0.454155		1.96	7.62076	82.7008	0.141782		1.96	8.30503	82.8496	0.566309		1.96	8.10146	81.8948	0.182734		2.44781	7.05279	82.9293	0.556477
1.47038	11.8515	82.7467	0.454674		1.962	7.54719	82.5436	0.154921		1.962	8.43668	82.9679	0.561618		1.962	8.26022	81.7748	0.201938		2.45072	6.98661	83.0253	0.542422
1.47148	11.7374	82.8043	0.450664		1.964	7.50515	82.4886	0.147825		1.964	8.43392	82.9801	0.563754		1.964	8.51689	81.9065	0.207466		2.45438	7.03482	82.9013	0.53856
1.47339	11.8048	82.6821	0.445792		1.966	7.59974	82.4825	0.141385		1.966	8.42949	82.9663	0.560147		1.966	8.32826	81.7993	0.202034		2.45572	7.07278	82.8994	0.536269
1.476	12.1888	82.8635	0.434747		1.968	7.87301	82.5808	0.150595		1.968	8.77412	83.0207	0.571011		1.968	8.40626	81.797	0.204536		2.4578	7.08967	82.8225	0.525244
1.47638	12.414	82.8114	0.434282		1.97	8.01074	82.4325	0.128246		1.97	8.6054	82.8368	0.55171		1.97	8.42175	81.8715	0.175016		2.46071	7.07827	82.8829	0.519814
1.47747	12.3152	82.7123	0.4374		1.972	7.67995	82.4225	0.119776		1.972	8.59876	82.7619	0.558516		1.972	8.55949	81.9653	0.185396		2.46437	6.96121	82.8615	0.525813
1.47939	12.2044	82.7108	0.427225		1.974	7.60748	82.4303	0.113078		1.974	8.75918	82.889	0.546128		1.974	8.50694	81.9987	0.183882		2.46571	7.1559	82.8292	0.538412
1.482	12.2834	82.7752	0.426503		1.976	7.9416	82.3819	0.131198		1.976	8.79237	82.8424	0.551184		1.976	8.60153	82.1498	0.165634		2.46779	7.17643	82.8101	0.520687
1.48237	12.4362	82.7343	0.434777		1.978	7.93662	82.4086	0.128664		1.978	8.86926	82.9057	0.536328		1.978	8.64965	81.8276	0.189937		2.4707	7.0022	82.7153	0.500109
1.48346	12.588	82.5221	0.42702		1.98	7.85254	82.4097	0.121225		1.98	8.95058	82.919	0.532313		1.98	8.75642	81.9059	0.181478		2.47437	7.17989	82.7716	0.510432
1.48538	12.7403	82.5203	0.421776		1.982	7.64952	82.4258	0.132604		1.982	8.66625	82.7807	0.524165		1.982	8.79127	81.9359	0.163476		2.47571	7.13652	82.8471	0.507302
1.488	12.8781	82.7257	0.424013		1.984	7.76237	82.2092	0.12115		1.984	8.98322	82.7924	0.546031		1.984	8.91075	82.0609	0.154008		2.47778	7.26004	82.8578	0.511127
1.48837	12.8708	82.5458	0.417097		1.986	8.02125	82.5947	0.124446		1.986	8.95279	82.8374	0.511101		1.986	8.94615	81.9542	0.161351		2.4807	7.29607	82.8701	0.513768
1.48946	12.7715	82.5392	0.425334		1.988	8.02845	82.3664	0.137102		1.988	9.03798	82.7457	0.522673		1.988	8.97381	82.012	0.161211		2.48437	7.26035	82.9515	0.50176
1.49138	12.8259	82.6317	0.43327		1.99	7.89513	82.3836	0.130006		1.99	9.01862	82.9074	0.53505		1.99	9.08721	81.902	0.162875		2.4857	7.27655	82.8173	0.507889
1.494	13.0014	82.573	0.414255		1.992	7.94658	82.3903	0.116288		1.992	9.04517	82.8502	0.528921		1.992	8.8925	82.0848	0.143907		2.48777	7.42978	82.7749	0.505144
1.49437	13.0433	82.5621	0.401251		1.994	8.081	82.1725	0.116899		1.994	9.11542	82.8291	0.521675		1.994	9.04075	81.9931	0.161394		2.49069	7.36978	82.8975	0.499237
1.49545	13.0002	82.6094	0.403607		1.996	8.13299	82.4514	0.093713		1.996	9.05181	82.8585	0.499948		1.996	9.02526	81.9831	0.157229		2.49437	7.31406	82.8605	0.496151
1.49737	12.9381	82.6096	0.40135		1.998	8.2204	82.4564	0.0864243		1.998	9.10547	82.8907	0.531937		1.998	9.06453	81.9237	0.162177		2.49569	7.53168	82.8593	0.491083
1.5	12.9771	82.6335	0.397305		2	8.14904	82.3536	0.0948294		2	9.12704	82.8785	0.508675		2	9.14198	81.9948	0.146312		2.49776	7.48454	82.7776	0.506517
1.50036	13.2413	82.4217	0.395303		2.002	8.19606	82.3503	0.113303		2.002	9.24542	82.8574	0.501365		2.002	9.02194	82.0248	0.126861		2.50068	7.43279	82.7802	0.483553
1.50145	13.5035	82.4091	0.392143		2.004	8.29009	82.3891	0.107185		2.004	9.21167	82.8418	0.516694		2.004	9.09772	82.0148	0.142029		2.50436	7.59473	82.7981	0.485701
1.50337	13.4767	82.5842	0.387449		2.006	8.23699	82.4069	0.0890864		2.006	9.28469	82.7257	0.502632		2.006	9.19785	82.0214	0.133645		2.50568	7.58235	82.8586	0.477404
1.506	13.3273	82.643	0.392958		2.008	8.38635	82.3603	0.082839		2.008	9.35163	82.8763	0.51006		2.008	9.2327	82.0376	0.13459		2.50775	7.68755	82.8619	0.475117
1.50636	13.1714	82.5648	0.402767		2.01	8.3692	82.3719	0.106412		2.01	9.47609	82.8341	0.495858		2.01	9.27861	82.1697	0.131606		2.51068	7.6204	82.7383	0.491562
1.50744	13.0732	82.5865	0.398645		2.012	8.34818	82.388	0.0896017		2.012	9.27861	82.7624	0.487679		2.012	9.19176	82.3408	0.11063		2.51436	7.64565	82.7859	0.474098
1.50936	13.2612	82.5759	0.392749		2.014	8.38081	82.3475	0.0982322		2.014	9.3389	82.8213	0.495129		2.014	9.14032	82.1259	0.122116		2.51568	7.80232	82.721	0.472878
1.512	13.4689	82.5786	0.392228		2.016	8.61536	82.3969	0.0919633		2.016	9.49268	82.8391	0.473606		2.016	9.3295	82.1042	0.119937		2.51774	7.80012	82.8164	0.468433
1.51235	13.3078	82.5205	0.385025		2.018	8.60042	82.2886	0.0858232		2.018	9.49379	82.8741	0.482698		2.018	9.28137	82.0787	0.111833		2.52067	7.91603	82.7489	0.460449
1.51343	13.1913	82.5069	0.383383		2.02	8.52409	82.3181	0.0759367		2.02	9.41358	82.6624	0.466875		2.02	9.16466	82.1714	0.112906		2.52436	7.79292	82.7702	0.465955
1.51536	13.2368	82.5188	0.389506		2.022	8.50196	82.3864	0.0822915		2.022	9.43294	82.8313	0.466113		2.022	9.06011	82.2353	0.107088		2.52567	7.81369	82.7435	0.443178
1.518	13.2415	82.563	0.387193		2.024	8.53128	82.4053	0.0856514		2.024	9.46724	82.828	0.489064		2.024	9.21942	82.1375	0.059191		2.52773	8.06983	82.6869	0.449695
1.51835	13.2611	82.4656	0.378429		2.026	8.68727	82.3764	0.0720079		2.026	9.71229	82.7596	0.469108		2.026	9.19674	82.0987	0.0969226		2.53066	8.12163	82.7609	0.454635
1.51943	13.28	82.4329	0.370802		2.028	8.73872	82.3869	0.0794254		2.028	9.70344	82.6124	0.48287		2.028	9.21057	82.202	0.10463		2.53435	8.01303	82.7352	0.451654
1.52136	13.3492	82.4612	0.365135		2.03	8.57276	82.5308	0.0843633		2.03	9.43405	82.7108	0.474293		2.03	9.21389	82.0498	0.11399		2.53566	8.19401	82.7291	0.44534
1.524	13.4777	82.5247	0.364125		2.032	8.70884	82.3492	0.0768277		2.032	9.55851	82.7496	0.484094		2.032	9.18014	82.1675	0.0916949		2.53773	8.26709	82.6707	0.452181
1.52434	13.3841	82.4578	0.362877		2.034	8.80233	82.2681	0.0995203		2.034	9.72778	82.7674	0.491844		2.034	9.30682	82.2636	0.106627		2.54065	8.20575	82.6824	0.462533
1.52542	13.2329	82.4117	0.360187		2.036	9.02028	82.418	0.0747237		2.036	9.7217	82.743	0.460542		2.036	9.2764	82.2031	0.0936164		2.54435	8.23903	82.7453	0.430948
1.52735	13.3048	82.5084	0.364339		2.038	9.07615	82.3853	0.0710096		2.038	9.71948	82.7113	0.464546		2.038	9.22606	82.2286	0.0817655		2.54566	8.45669	82.6975	0.440842
1.53	13.3881	82.6369	0.370888		2.04	8.94228	82.3991	0.0583		2.04	9.63485	82.6858	0.468099		2.04	9.06785	82.2408	0.106916		2.54772	8.52343	82.8632	0.447664
1.53034	13.369	82.4787	0.363465		2.042	8.95611	82.2242	0.0673706		2.042	9.81463	82.7052	0.458921		2.042	9.14972	82.2886	0.0808102		2.55065	8.54986	82.7916	0.440401
1.53141	13.4097	82.3861	0.355043		2.044	9.1121	82.3114	0.0608548		2.044	9.83122	82.6169	0.478104		2.044	9.3129	82.2136	0.102837		2.55435	8.5714	82.714	0.437131
1.53335	13.2677	82.3749	0.364444		2.046	9.26146	82.2992	0.062991		2.046	9.90535	82.7002	0.467455		2.046	9.31788	82.2847	0.0965254		2.55565	8.70363	82.7227	0.433613
1.536	13.111	82.4425	0.365692		2.048	9.1641	82.3019	0.0580531		2.048	9.94518	82.7885	0.474143		2.048	9.21333	82.3075	0.0849751		2.55771	8.7945	82.6817	0.419626
1.53633	13.2215	82.4509	0.349367		2.05	9.19397	82.2742	0.0643972		2.05	9.96786	82.6274	0.459318		2.05	9.25593	82.237	0.0806599		2.56064	8.80054	82.6362	0.430257
1.53741	13.2614	82.353	0.351591		2.052	9.27031	82.2447	0.0502706		2.052	10.0331	82.7357	0.447457		2.052	9.30627	82.3331	0.0644509		2.56435	8.87351	82.703	0.428826
1.53934	13.3369	82.3718	0.359022		2.054	9.44732	82.2892	0.0604147		2.054	10.099	82.6741	0.438977		2.054	9.46226	82.3475	0.0752175		2.56564	9.06262	82.729	0.427445
1.542	13.4816	82.5886	0.34564		2.056	9.47222	82.2481	0.0551548		2.056	10.1382	82.6147	0.434683		2.056	9.3212	82.3747	0.0844921		2.5677	8.93395	82.5801	0.446893
1.54233	13.2699	82.4903	0.337083		2.058	9.45618	82.3525	0.0596311		2.058	10.2113	82.723	0.448101		2.058	9.24984	82.4091	0.0608548		2.57063	9.02	82.6831	0.428231
1.5434	13.1446	82.3753	0.346043		2.06	9.42962	82.3081	0.0533514		2.06	10.3755	82.6491	0.445471		2.06	9.29133	82.3492	0.0608119		2.57434	9.22964	82.6236	0.431078
1.54534	13.2762	82.3654	0.354349		2.062	9.56958	82.3447	0.0453113		2.062	10.1593	82.6652	0.425108		2.062	9.56736	82.4491	0.061939		2.57563	9.2464	82.6867	0.413235
1.548	13.2841	82.3447	0.345941		2.064	9.67966	82.2797	0.0509576		2.064	10.4751	82.6202	0.435595		2.064	9.31456	82.3147	0.057774		2.57769	9.31093	82.5366	0.414001
1.54832	13.2604	82.3104	0.325592		2.066	9.7311	82.2775	0.0448712		2.066	10.3247	82.7257	0.447049		2.066	9.44124	82.3247	0.068648		2.58062	9.4726	82.628	0.405373
1.5494	13.3051	82.4001	0.321674		2.068	9.80744	82.2325	0.0356503		2.068	10.5614	82.6385	0.448519		2.068	9.48051	82.2886	0.0563356		2.58434	9.60328	82.6895	0.416688
1.55133	13.2945	82.4333	0.334531		2.07	9.95126	82.2225	0.0452576		2.07	10.4342	82.6497	0.435477		2.07	9.62489	82.4003	0.0603825		2.58563	9.71171	82.6304	0.408917
1.554	13.2564	82.4625	0.340681		2.072	10.0707	82.2547	0.0429497		2.072	10.5371	82.5469	0.457848		2.072	9.55796	82.5052	0.0490791		2.58768	9.7415	82.4352	0.404845
1.55432	13.2324	82.4267	0.342161		2.074	10.094	82.182	0.0478017		2.074	10.5631	82.5502	0.409467		2.074	9.69625	82.2792	0.052117		2.59062	9.67075	82.3993	0.397337
1.55539	13.2774	82.4136	0.344972		2.076	10.0082	82.2275	0.0174339		2.076	10.703	82.553	0.437785		2.076	9.56404	82.4325	0.0572802		2.59434	9.88956	82.5646	0.402194
1.55733	13.3431	82.3753	0.337405		2.078	10.0647	82.2703	0.0250339		2.078	10.7987	82.7924	0.431924		2.078	9.44732	82.3775	0.0486175		2.59562	9.92329	82.4839	0.416732
1.56	13.3477	82.4941	0.328851		2.08	10.1642	82.2436	0.0592124		2.08	10.7323	82.6641	0.41754		2.08	9.67523	82.3692	0.0507644		2.59767	10.0426	82.5873	0.388196
1.56032	13.3557	82.5874	0.330649		2.082	10.3158	82.3036	0.0355		2.082	10.8574	82.633	0.416584		2.082	9.68629	82.3303	0.0440661		2.60061	10.1646	82.4391	0.395278
1.56138	13.4059	82.542	0.32557		2.084	10.4021	82.2981	0.0321294		2.084	10.8911	82.6508	0.426202		2.084	9.65476	82.3008	0.0438622		2.60434	10.1715	82.5738	0.396125
1.56332	13.2906	82.4801	0.317904		2.086	10.3584	82.1314	0.054865		2.086	10.9199	82.6435	0.423819		2.086	9.76595	82.4064	0.0383661		2.60561	10.2763	82.4874	0.39486
1.566	13.2919	82.5536	0.332222		2.088	10.427	82.2925	0.016178		2.088	11.015	82.5941	0.423068		2.088	9.77425	82.4258	0.0506249		2.60766	10.3454	82.4785	0.397098
1.56631	13.4735	82.4949	0.342041		2.09	10.4829	82.197	0.0369599		2.09	11.036	82.6535	0.429981		2.09	9.78255	82.3414	0.0583107		2.6106	10.5419	82.4944	0.395395
1.56738	13.3552	82.4937	0.323764		2.092	10.6422	82.3125	0.0365627		2.092	11.0637	82.6363	0.425311		2.092	9.8705	82.3719	0.0319898		2.61433	10.5258	82.4583	0.39496
1.56932	13.3083	82.5183	0.318709		2.094	10.7301	82.2131	0.0262791		2.094	11.2285	82.7091	0.414996		2.094	9.98003	82.4286	0.0401373		2.6156	10.559	82.4569	0.387394
1.572	13.5856	82.5136	0.333607		2.096	10.7611	82.3625	0.0467068		2.096	11.3486	82.543	0.429734		2.096	10.0342	82.4469	0.0558955		2.61765	10.7079	82.4199	0.389137
1.57231	13.4922	82.4399	0.330389		2.098	10.9575	82.2131	0.0277068		2.098	11.2993	82.5402	0.403349		2.098	10.006	82.5025	0.0351028		2.6206	10.7083	82.4741	0.383836
1.57337	13.2445	82.4196	0.320871		2.1	10.9719	82.2275	0.0214594		2.1	11.4315	82.6608	0.406054		2.1	10.0967	82.493	0.0266763		2.62433	10.7722	82.5113	0.392725
1.57531	13.3461	82.4007	0.317993		2.102	11.0272	82.2392	0.0395147		2.102	11.4636	82.5541	0.424345		2.102	10.1653	82.4886	0.047104		2.6256	10.927	82.4439	0.402305
1.578	13.4727	82.5063	0.315959		2.104	11.077	82.2125	0.0266441		2.104	11.5649	82.5747	0.414523		2.104	10.1725	82.3814	0.0450215		2.62765	10.9753	82.3768	0.391884
1.5783	13.4717	82.4971	0.317056		2.106	11.1063	82.1642	0.0217599		2.106	11.6202	82.5747	0.401266		2.106	10.1786	82.438	0.026161		2.63059	11.2187	82.3957	0.379965
1.57936	13.5715	82.4147	0.316204		2.108	11.3209	82.0481	0.00666726		2.108	11.6738	82.4297	0.408491		2.108	10.2588	82.6285	0.0364768		2.63433	11.3249	82.4285	0.396787
1.58131	13.6086	82.4457	0.320895		2.11	11.2789	82.2475	0.0135051		2.11	11.6987	82.528	0.407031		2.11	10.1687	82.4686	0.0227904		2.63559	11.3299	82.3482	0.390102
1.584	13.5358	82.5008	0.328787		2.112	11.3458	82.2264	0.0266548		2.112	11.826	82.5958	0.41375		2.112	10.3462	82.4964	-0.00757732		2.63764	11.3793	82.36	0.377806
1.5843	13.5365	82.338	0.317455		2.114	11.4808	82.1042	0.0157486		2.114	11.9006	82.5513	0.417293		2.114	10.4082	82.5697	0.00570118		2.64058	11.492	82.3801	0.378984
1.58536	13.5516	82.4143	0.308547		2.116	11.5145	82.2675	0.0224791		2.116	11.837	82.5108	0.426482		2.116	10.4038	82.5691	0.027052		2.64433	11.7048	82.4989	0.381671
1.58731	13.5419	82.5039	0.323554		2.118	11.6213	82.1675	0.0275672		2.118	12.0505	82.5258	0.410584		2.118	10.5526	82.5497	0.0269661		2.64558	11.6703	82.3913	0.384359
1.59	13.5856	82.4258	0.331192		2.12	11.6998	82.1081	0.00470286		2.12	12.0804	82.5208	0.410262		2.12	10.6034	82.7263	0.0139238		2.64763	11.7377	82.273	0.361732
1.59029	13.5892	82.3981	0.323355		2.122	11.8674	82.1398	0.00871755		2.122	11.9299	82.4986	0.414395		2.122	10.7135	82.6002	0.0268373		2.65057	11.9478	82.4068	0.36576
1.59135	13.6499	82.4596	0.32284		2.124	11.8752	82.0942	0.00477801		2.124	12.31	82.4958	0.412709		2.124	10.7113	82.5824	0.00579777		2.65432	11.9633	82.3784	0.375979
1.5933	13.7819	82.4172	0.309776		2.126	11.9914	82.0564	0.0189367		2.126	12.3592	82.5663	0.402146		2.126	10.8319	82.7619	0.028104		2.65558	12.047	82.3005	0.373022
1.596	13.8555	82.4697	0.292526		2.128	11.9631	82.1087	0.028791		2.128	12.4284	82.4403	0.416692		2.128	10.8369	82.663	0.0252593		2.65762	12.3025	82.2309	0.373795
1.59629	13.852	82.4298	0.309193		2.13	12.0882	82.082	0.0105961		2.13	12.4101	82.4947	0.41477		2.13	11.0211	82.9557	0.0250661		2.66057	12.2325	82.4456	0.374657
1.59735	13.85	82.3672	0.326719		2.132	12.2148	82.0881	-0.0201903		2.132	12.669	82.4558	0.399366		2.132	10.9254	82.6419	0.0212447		2.66432	12.33	82.6363	0.36113
1.5993	13.8962	82.3869	0.318313		2.134	12.2685	82.1425	0.00979099		2.134	12.8139	82.4197	0.406526		2.134	11.0637	82.5813	0.0201283		2.66557	12.3455	82.2678	0.364005
1.602	13.9695	82.5397	0.309497		2.136	12.3465	82.0464	0.0296819		2.136	12.8626	82.4491	0.429595		2.136	11.1721	82.6302	0.0168435		2.66761	12.4546	82.2882	0.365016
1.60228	14.0068	82.4947	0.315811		2.138	12.4826	82.0153	0.0048102		2.138	12.8211	82.3919	0.398958		2.138	11.1395	82.7596	0.017187		2.67056	12.6304	82.284	0.368043
1.60334	14.0649	82.3531	0.329744		2.14	12.5152	82.0098	0.0121848		2.14	12.9245	82.4941	0.401814		2.14	11.3735	82.6552	-0.00105081		2.67432	12.8387	82.39	0.370107
1.60529	14.0915	82.3491	0.318936		2.142	12.6789	81.9426	0.0267836		2.142	12.8958	82.393	0.400118		2.142	11.2313	82.6352	0.0110255		2.67556	12.8106	82.1174	0.370191
1.608	14.0973	82.3892	0.301779		2.144	12.6529	82.0437	-0.00506549		2.144	13.1696	82.3842	0.393205		2.144	11.4625	82.638	-6.32422e-05		2.6776	12.9436	82.1652	0.360161
1.60828	14.0972	82.2548	0.305465		2.146	12.7923	82.0309	0.000859922		2.146	13.049	82.4247	0.408104		2.146	11.5577	82.8613	0.0126142		2.68055	13.0633	82.1839	0.363756
1.60933	14.116	82.4045	0.300517		2.148	12.8753	82.0031	0.00754749		2.148	13.2271	82.4391	0.396371		2.148	11.6429	82.6558	0.0147611		2.68432	13.1401	82.3428	0.368578
1.61129	14.3041	82.5753	0.305477		2.15	13.0147	81.9537	-0.00842537		2.15	13.3356	82.4041	0.402415		2.15	11.4913	82.884	0.00520738		2.68555	13.2293	82.2354	0.371437
1.614	14.521	82.4958	0.318418		2.152	13.0811	82.0087	0.00620568		2.152	13.3936	82.4525	0.406816		2.152	11.7275	82.8235	0.0069893		2.68759	13.3983	82.3147	0.353812
1.61428	14.4286	82.3793	0.303949		2.154	13.2476	81.8359	-0.00318697		2.154	13.5806	82.4814	0.398089		2.154	11.8957	82.7502	0.0128825		2.69054	13.3916	82.2661	0.366934
1.61533	14.3262	82.4008	0.306597		2.156	13.1193	82.0226	0.00285653		2.156	13.6464	82.2781	0.390242		2.156	11.9537	82.8902	0.00760116		2.69431	13.451	82.3077	0.368447
1.61728	14.4725	82.3577	0.317709		2.158	13.2293	81.9459	0.0170475		2.158	13.5917	82.3869	0.39971		2.158	11.9394	82.7146	0.00124636		2.69555	13.6676	82.2682	0.36498
1.62	14.6228	82.388	0.299546		2.16	13.413	81.9537	0.0299396		2.16	13.8445	82.3675	0.399635		2.16	12.0256	82.7952	0.00379043		2.69758	13.6987	82.374	0.359287
1.62027	14.6341	82.3777	0.291455		2.162	13.5845	81.9087	0.0124531		2.162	13.9186	82.4391	0.3924		2.162	12.1114	82.7469	0.011165		2.70054	13.7758	82.2615	0.359554
1.62132	14.6753	82.3677	0.301842		2.164	13.4246	82.0264	0.0100271		2.164	13.9297	82.3197	0.390661		2.164	12.243	82.798	0.0107464		2.70431	13.916	82.325	0.339922
1.62328	14.7581	82.3631	0.313417		2.166	13.5541	81.967	0.00496049		2.166	14.0419	82.4214	0.403843		2.166	12.2729	82.7763	-0.000320866		2.70554	13.9187	82.198	0.359734
1.626	14.7506	82.468	0.316228		2.168	13.756	81.9481	0.0111435		2.168	14.1089	82.2992	0.382384		2.168	12.3979	82.7569	-0.00705137		2.70757	14.0603	82.2367	0.359551
1.62627	14.6776	82.4264	0.300729		2.17	13.7986	81.9381	0.00257743		2.17	14.1465	82.4086	0.385637		2.17	12.3719	82.7296	0.00421982		2.71053	14.0878	82.1844	0.353227
1.62731	14.7144	82.3029	0.29319		2.172	13.8777	81.8326	0.000988734		2.172	14.2134	82.2847	0.382298		2.172	12.4687	82.7868	0.00971585		2.71431	14.0677	82.2524	0.371017
1.62927	14.7949	82.3534	0.297198		2.174	14.0254	81.927	0.008578		2.174	14.3589	82.3158	0.390865		2.174	12.5329	82.7502	0.00780513		2.71553	14.4228	82.3001	0.357366
1.632	14.9187	82.5119	0.299332		2.176	14.0148	81.8693	-0.0022316		2.176	14.4596	82.1481	0.405249		2.176	12.6856	82.7691	-0.006096		2.71756	14.3645	82.3865	0.373617
1.63226	15.0506	82.4217	0.29194		2.178	14.1985	81.8226	0.00345766		2.178	14.6178	82.3069	0.385766		2.178	12.8493	82.8263	0.00310343		2.72052	14.4173	82.2297	0.365295
1.63331	15.0584	82.4167	0.276269		2.18	14.1598	81.9092	0.00580851		2.18	14.6217	82.3342	0.375074		2.18	12.929	82.8402	0.00711811		2.72431	14.5652	82.2818	0.353249
1.63527	15.053	82.376	0.290953		2.182	14.3003	81.937	-0.00975645		2.182	14.6792	82.4514	0.414856		2.182	12.9583	82.8452	-0.00394911		2.72552	14.6628	82.2566	0.36253
1.638	15.1433	82.3514	0.307168		2.184	14.433	81.8015	0.000333936		2.184	14.7511	82.3869	0.385744		2.184	12.9439	82.8868	0.00425201		2.72756	14.7725	82.1756	0.348217
1.63826	15.155	82.4235	0.279816		2.186	14.2571	81.9098	0.00268478		2.186	14.8933	82.2836	0.386066		2.186	13.1596	82.9501	-0.00278979		2.73052	14.914	82.3195	0.349276
1.6393	15.2111	82.4196	0.270412		2.188	14.563	81.8498	-0.00115815		2.188	14.9962	82.2425	0.386077		2.188	13.262	82.9624	0.00114975		2.7343	15.0057	82.1505	0.356878
1.64126	15.3802	82.401	0.281471		2.19	14.4967	81.8431	-0.00832876		2.19	15.0526	82.2059	0.4038		2.19	13.3372	82.8046	0.00470286		2.73552	15.0046	82.319	0.353475
1.644	15.3596	82.5508	0.281781		2.192	14.672	81.8843	-0.0185372		2.192	15.0255	82.3314	0.387913		2.192	13.3273	82.8796	-0.00349827		2.73755	15.088	82.3216	0.368401
1.64425	15.2644	82.4275	0.294426		2.194	14.7279	81.8848	-0.00789938		2.194	15.2567	82.2381	0.387065		2.194	13.5662	82.8591	0.000892127		2.74051	15.2127	82.2084	0.332879
1.6453	15.4473	82.3458	0.298907		2.196	14.8424	81.8004	-0.0162401		2.196	15.2949	82.3408	0.410519		2.196	13.548	82.8946	0.00292094		2.7443	15.2151	82.259	0.344475
1.64726	15.4909	82.4392	0.295408		2.198	14.8662	81.8654	0.013956		2.198	15.3502	82.3292	0.400547		2.198	13.704	82.8879	-0.000438944		2.74551	15.418	82.3351	0.369091
1.65	15.4077	82.493	0.294898		2.2	14.9187	81.8643	0.00525032		2.2	15.4586	82.2092	0.381912		2.2	13.9402	82.939	0.00298535		2.74754	15.4318	82.2633	0.342988
1.65025	15.6413	82.3994	0.292883		2.202	15.078	81.982	-0.0105401		2.202	15.4918	82.3714	0.394793		2.202	13.9158	82.8896	-0.000911262		2.7505	15.5757	82.2047	0.346249
1.65129	15.7872	82.3866	0.306228		2.204	15.0946	81.8959	0.00462772		2.204	15.5825	82.2764	0.38217		2.204	13.9435	83.0062	0.0140741		2.7543	15.6578	82.2392	0.35149
1.65326	15.655	82.3959	0.286816		2.206	15.1804	81.8432	-0.00117962		2.206	15.6777	82.3114	0.389415		2.206	14.0685	82.8763	-0.00760956		2.7555	15.6675	82.2768	0.351345
1.656	15.7308	82.4241	0.26219		2.208	15.2274	81.9115	0.00563675		2.208	15.8077	82.3403	0.411722		2.208	14.131	82.9485	-0.000610685		2.75753	15.8047	82.2941	0.360115
1.65624	15.8961	82.3437	0.290756		2.21	15.426	81.8026	-0.00268245		2.21	15.8386	82.2992	0.377951		2.21	14.2582	83.1423	-0.00442143		2.76049	15.9367	82.2717	0.339106
1.65728	15.916	82.3165	0.292192		2.212	15.4144	81.7754	0.00955483		2.212	15.8768	82.4491	0.393988		2.212	14.2428	82.934	0.00693562		2.7643	15.9895	82.3509	0.36434
1.65925	15.9232	82.307	0.281982		2.214	15.3723	81.8559	-0.0025429		2.214	15.9709	82.2681	0.399023		2.214	14.4225	82.9152	0.0175842		2.7655	16.1296	82.3105	0.356291
1.662	16.0527	82.3147	0.29887		2.216	15.7175	81.8576	0.00208365		2.216	15.8956	82.4453	0.40234		2.216	14.7373	82.9768	-0.000814651		2.76752	16.2026	82.2962	0.363742
1.66224	16.1131	82.3007	0.287976		2.218	15.7424	81.8376	0.00548647		2.218	16.2231	82.388	0.390263		2.218	14.5575	82.9085	0.00993054		2.77049	16.3452	82.2352	0.346197
1.66328	16.0467	82.4289	0.28833		2.22	15.6948	81.8681	0.0218458		2.22	16.1894	82.3508	0.388782		2.22	14.8833	83.0018	0.00357574		2.77429	16.4566	82.3919	0.36046
1.66525	16.0982	82.4392	0.301083		2.222	15.8801	81.827	-0.00760956		2.222	16.2336	82.3486	0.394493		2.222	14.7854	82.9629	-0.000267197		2.77549	16.5989	82.2658	0.349575
1.668	16.2214	82.3625	0.293031		2.224	16.1517	81.9187	0.00126784		2.224	16.4283	82.3003	0.384499		2.224	14.927	82.8218	-0.00852199		2.77751	16.6368	82.3128	0.358368
1.66823	16.1758	82.301	0.30016		2.226	15.9703	81.817	-0.00905871		2.226	16.4753	82.3786	0.378026		2.226	14.8977	82.989	-3.10391e-05		2.78048	16.7946	82.3462	0.356641
1.66927	16.2103	82.3347	0.301872		2.228	16.0334	81.8359	-0.000524823		2.228	16.5345	82.3853	0.393441		2.228	14.9231	82.8879	-0.00918751		2.78429	16.9436	82.2977	0.352293
1.67124	16.4044	82.3702	0.29187		2.23	16.1833	81.8726	0.00374751		2.23	16.6092	82.2475	0.377618		2.23	15.182	82.9229	-0.00445363		2.78548	17.0302	82.3547	0.356036
1.674	16.5036	82.3842	0.29711		2.232	16.1816	81.7548	0.00775146		2.232	16.6385	82.408	0.391798		2.232	15.3745	82.9435	-0.0120536		2.7875	17.133	82.3679	0.347686
1.67423	16.5315	82.2713	0.29736		2.234	16.373	81.8904	-0.0282412		2.234	16.7912	82.3636	0.391498		2.234	15.4747	82.9935	-0.0263734		2.79047	17.3797	82.3884	0.378642
1.67527	16.6331	82.3475	0.294465		2.236	16.4615	81.8298	-0.00595646		2.236	16.8565	82.4658	0.405356		2.236	15.5366	82.9185	-0.00588132		2.79429	17.4372	82.3738	0.347039
1.67724	16.6421	82.4082	0.293814		2.238	16.4886	81.7915	0.00682828		2.238	16.9146	82.398	0.37414		2.238	15.52	82.9601	-0.00651464		2.79547	17.5687	82.3573	0.356472
1.68	16.7221	82.3403	0.290572		2.24	16.5849	81.8548	-0.014705		2.24	16.8249	82.4447	0.36887		2.24	15.6887	82.9257	-0.0104327		2.79749	17.6755	82.3158	0.346954
1.68023	17.0048	82.2881	0.293395		2.242	16.7248	81.8409	-0.00183443		2.242	17.044	82.3747	0.381955		2.242	15.7772	83.0018	0.000484214		2.80046	17.7132	82.3214	0.348991
1.68126	17.1308	82.3206	0.298575		2.244	16.7973	81.8598	0.0022232		2.244	17.1911	82.3447	0.396887		2.244	15.853	83.0362	-0.00226381		2.80429	17.8364	82.3633	0.362513
1.68323	17.0459	82.214	0.303427		2.246	16.8537	81.8659	-0.0120644		2.246	17.2608	82.4347	0.38145		2.246	15.9399	82.9563	0.000580824		2.80547	17.926	82.3862	0.358431
1.686	17.0977	82.2936	0.306942		2.248	16.9383	81.8598	-0.0157248		2.248	17.2885	82.4519	0.393323		2.248	16.1506	83.0235	0.00200852		2.80748	18.0351	82.3493	0.341362
1.68622	17.2089	82.3961	0.305156		2.25	17.0949	81.9681	-0.00431408		2.25	17.4788	82.3858	0.380366		2.25	16.1794	82.959	-0.00446437		2.81046	18.1994	82.3562	0.338295
1.68725	17.2818	82.2734	0.303356		2.252	17.2133	81.9142	-0.00555928		2.252	17.4699	82.5669	0.364984		2.252	16.1954	82.9318	-0.00877962		2.81428	18.3136	82.3216	0.338381
1.68923	17.3645	82.2113	0.294424		2.254	17.3554	81.852	-0.00306889		2.254	17.5419	82.3375	0.386818		2.254	16.3902	83.0201	0.00791247		2.81546	18.3677	82.3792	0.347199
1.692	17.4445	82.3031	0.290229		2.256	17.2199	81.8404	0.00858873		2.256	17.8207	82.4447	0.394525		2.256	16.5318	83.049	0.0229944		2.81747	18.5898	82.3293	0.348967
1.69222	17.5004	82.0929	0.302025		2.258	17.4954	81.8798	-0.000116912		2.258	17.7321	82.4247	0.401524		2.258	16.6618	83.0218	-0.00480787		2.82045	18.6352	82.3503	0.344768
1.69325	17.5783	82.0568	0.304896		2.26	17.6364	81.8748	0.0113153		2.26	17.8522	82.4414	0.378273		2.26	16.6911	82.9801	-0.0216502		2.82428	18.7568	82.372	0.34473
1.69522	17.612	82.1938	0.301615		2.262	17.751	81.9131	-0.0136531		2.262	17.9429	82.463	0.386313		2.262	16.779	83.0124	-0.00751295		2.82545	18.8987	82.4525	0.350974
1.698	17.7039	82.242	0.298151		2.264	17.8538	81.9159	-0.00179148		2.264	18.0795	82.4675	0.380012		2.264	16.9699	83.0162	-0.00405645		2.82747	18.9793	82.3832	0.371972
1.69821	17.8736	82.2498	0.291137		2.266	17.8467	81.9659	-0.00149092		2.266	18.2311	82.5469	0.374409		2.266	17.0307	82.9618	-0.0242801		2.83044	19.2533	82.3506	0.365123
1.69924	17.9038	82.2538	0.301462		2.268	17.9899	81.9642	0.00625936		2.268	18.3213	82.4608	0.385519		2.268	17.0506	82.9585	-0.015231		2.83428	19.1501	82.4625	0.354418
1.70122	17.839	82.129	0.304608		2.27	18.2234	81.9204	-0.00242482		2.27	18.4208	82.4541	0.391251		2.27	17.1026	83.0068	-0.000578493		2.83544	19.3863	82.3961	0.366749
1.704	17.9866	82.2053	0.291914		2.272	18.2671	81.9292	-0.00745928		2.272	18.4861	82.4075	0.401159		2.272	17.3565	82.9929	-0.0112056		2.83746	19.468	82.4044	0.347663
1.70421	18.184	82.2613	0.296385		2.274	18.3285	81.8898	-0.0133954		2.274	18.5818	82.4908	0.388363		2.274	17.4954	83.0418	-0.00475419		2.84044	19.502	82.4447	0.36004
1.70523	18.2333	82.1896	0.297384		2.276	18.4203	81.9148	-0.0225412		2.276	18.7234	82.5358	0.392496		2.276	17.5313	82.8479	-0.0148338		2.84428	19.6771	82.4623	0.361925
1.70721	18.2706	82.2107	0.289008		2.278	18.5929	82.0348	-0.00682595		2.278	18.8164	82.468	0.392206		2.278	17.7592	82.9846	-0.00201691		2.84544	19.7593	82.461	0.358141
1.71	18.3611	82.3019	0.295564		2.28	18.7433	81.9098	0.00818082		2.28	18.7942	82.5752	0.403843		2.28	17.7521	83.0657	-0.00788866		2.84745	19.9451	82.3662	0.336583
1.7102	18.3889	82.1403	0.296909		2.282	18.6996	81.9526	-0.0120107		2.282	18.9519	82.5047	0.393784		2.282	17.8533	82.9651	-0.00953103		2.85043	19.9531	82.4843	0.340143
1.71123	18.4567	82.1582	0.287014		2.284	18.8866	81.9565	-0.0106259		2.284	19.1449	82.4175	0.378048		2.284	17.949	83.0662	-0.00376662		2.85427	20.1526	82.6307	0.355287
1.71321	18.5422	82.2287	0.285848		2.286	18.8783	81.9731	-0.00534459		2.286	19.192	82.4386	0.390682		2.286	18.0436	82.9302	-0.00692256		2.85543	20.2223	82.4682	0.362334
1.716	18.6288	82.2686	0.281738		2.288	19.0166	81.9792	-0.017131		2.288	19.4602	82.5902	0.383887		2.288	18.3008	82.959	-0.0070621		2.85744	20.2066	82.3822	0.348519
1.7162	18.7355	82.3315	0.274133		2.29	19.1084	82.012	-0.0151774		2.29	19.213	82.5513	0.381128		2.29	18.2925	82.909	-0.00117962		2.86042	20.402	82.3597	0.348083
1.71722	18.7965	82.2799	0.288385		2.292	19.192	81.9981	0.00302828		2.292	19.4918	82.4391	0.385862		2.292	18.3522	82.9496	0.0169187		2.86427	20.5231	82.5041	0.362671
1.71921	18.8577	82.2056	0.302308		2.294	19.2567	81.9848	0.0143209		2.294	19.5277	82.5125	0.395169		2.294	18.4861	83.0207	0.0214808		2.86542	20.6407	82.4588	0.345672
1.722	18.9646	82.3414	0.299707		2.296	19.4005	82.0381	-0.0192994		2.296	19.6201	82.5736	0.400225		2.296	18.5846	83.0262	-0.00611747		2.86743	20.7151	82.6342	0.346373
1.72219	18.9874	82.2633	0.29073		2.298	19.4851	81.9748	0.00823449		2.298	19.7313	82.4186	0.381193		2.298	18.5929	82.9924	-0.00897284		2.87041	20.863	82.485	0.354171
1.72322	19.0395	82.1988	0.273819		2.3	19.551	82.0498	-0.00560222		2.3	19.8209	82.5413	0.38364		2.3	18.7129	82.9663	-0.0207593		2.87427	21.0286	82.4484	0.355333
1.7252	19.1213	82.2258	0.280551		2.302	19.6776	82.1159	0.00116049		2.302	19.9459	82.5425	0.380967		2.302	18.8888	83.0362	-0.00745928		2.87542	21.0428	82.4404	0.344456
1.728	19.1814	82.2608	0.300373		2.304	19.7169	81.9565	-0.00377736		2.304	19.8801	82.5247	0.38305		2.304	18.9021	82.9774	-0.0129124		2.87742	21.1519	82.4914	0.33912
1.72819	19.2469	82.2368	0.285332		2.306	19.9028	82.3103	-0.0222621		2.306	20.2197	82.5491	0.376878		2.306	18.9093	82.7585	0.00472434		2.88041	21.3288	82.4229	0.351511
1.72921	19.2956	82.2133	0.279379		2.308	19.9415	82.0481	-0.00579544		2.308	20.2131	82.7052	0.382771		2.308	19.005	82.9052	-0.00998187		2.88427	21.4086	82.345	0.349571
1.7312	19.3245	82.1603	0.29967		2.31	20.0842	82.0709	-0.0031655		2.31	20.3343	82.5836	0.379787		2.31	19.2805	83.0329	-0.00862934		2.88541	21.4656	82.4807	0.362177
1.734	19.4779	82.2431	0.293363		2.312	20.3304	82.0142	-0.00466832		2.312	20.3774	82.5713	0.378219		2.312	19.2196	83.0418	0.00383337		2.88741	21.5819	82.339	0.349594
1.73418	19.5725	82.2126	0.277891		2.314	20.212	82.0725	-0.0136316		2.314	20.5124	82.6285	0.392153		2.314	19.3878	82.9807	-0.0193531		2.8904	21.6609	82.4881	0.343737
1.7352	19.5198	82.1436	0.287389		2.316	20.488	82.0314	-0.0120644		2.316	20.6291	82.528	0.377135		2.316	19.4508	82.979	-0.0028864		2.89426	21.6964	82.4859	0.350393
1.73719	19.6392	82.2157	0.289781		2.318	20.3509	82.0009	0.00814864		2.318	20.6285	82.6441	0.377951		2.318	19.4691	83.0085	-0.0108192		2.8954	21.9317	82.5109	0.349307
1.74	19.8513	82.3436	0.281029		2.32	20.3663	82.0453	-0.0153813		2.32	20.701	82.5519	0.387183		2.32	19.6633	82.9618	0.0135481		2.8974	22.0918	82.397	0.353086
1.74018	19.8245	82.1789	0.28952		2.322	20.6031	81.9809	-0.0145118		2.322	20.9527	82.6724	0.37443		2.322	19.8076	83.0485	-0.0181615		2.90039	22.0956	82.4294	0.349519
1.7412	19.8558	82.0885	0.294556		2.324	20.5732	82.037	0.00869608		2.324	20.8847	82.5902	0.372251		2.324	19.9255	82.9002	-0.009209		2.90426	22.3017	82.4742	0.360256
1.74319	19.9355	82.1648	0.282368		2.326	20.7088	82.0781	-0.00871521		2.326	20.9793	82.6513	0.388256		2.326	19.9144	82.8685	-0.0312898		2.90539	22.317	82.4871	0.346277
1.746	19.9365	82.2297	0.28557		2.328	20.883	82.1081	-0.0141039		2.328	21.1098	82.583	0.378939		2.328	19.9675	82.9296	-0.00695476		2.90739	22.5843	82.5419	0.35674
1.74618	20.0347	82.1907	0.295298		2.33	20.9322	82.0492	-0.00919826		2.33	21.3034	82.7563	0.380549		2.33	20.1384	82.959	-0.00110448		2.91039	22.3881	82.4028	0.333978
1.74719	20.145	82.2425	0.287635		2.332	21.0091	82.2336	-0.0101429		2.332	21.1563	82.6658	0.385894		2.332	20.1705	82.8996	-0.0107548		2.91426	22.5086	82.4245	0.347744
1.74918	20.1816	82.2169	0.288653		2.334	21.0954	82.0653	-0.0186446		2.334	21.3349	82.658	0.391101		2.334	20.3492	82.9513	-0.016122		2.91539	22.7494	82.477	0.346302
1.752	20.2701	82.2564	0.29477		2.336	21.2066	82.0553	-0.0139644		2.336	21.4727	82.7641	0.369009		2.336	20.2933	82.8968	-0.00716945		2.91739	22.7489	82.4319	0.348322
1.75217	20.3093	82.281	0.28719		2.338	21.2215	82.1092	-0.0192994		2.338	21.5634	82.6169	0.378649		2.338	20.3946	82.7563	-0.0173028		2.92038	22.8943	82.5755	0.352396
1.75318	20.3613	82.1941	0.29245		2.34	21.2918	82.1009	0.0114548		2.34	21.6375	82.6585	0.370126		2.34	20.6075	83.0035	-0.0227344		2.92426	22.9315	82.5273	0.360246
1.75518	20.4744	82.1644	0.295641		2.342	21.4378	82.1581	0.00307123		2.342	21.6679	82.663	0.347315		2.342	20.6402	82.9102	-0.0164762		2.92538	23.0543	82.48	0.348455
1.758	20.602	82.2847	0.282972		2.344	21.4351	82.102	-0.00263951		2.344	21.8499	82.5713	0.381461		2.344	20.7342	82.894	-0.0165299		2.92738	23.1696	82.4363	0.336136
1.75817	20.6528	82.1993	0.288451		2.346	21.6248	82.1359	-0.0118282		2.346	21.804	82.6491	0.395502		2.346	20.6352	82.8929	0.00227688		2.93037	23.3396	82.6091	0.346882
1.75918	20.6343	82.207	0.298675		2.348	21.6475	82.2081	-0.00284347		2.348	21.9064	82.613	0.381214		2.348	20.8719	82.9696	0.00109608		2.93425	23.4322	82.6855	0.347823
1.76117	20.6687	82.2237	0.29528		2.35	21.6619	81.9553	-0.00523725		2.35	21.9108	82.6796	0.374205		2.35	20.9416	82.8968	-0.00549488		2.93537	23.4569	82.3478	0.350542
1.764	20.8233	82.1886	0.301221		2.352	21.8776	82.0364	-0.0225412		2.352	22.105	82.703	0.385991		2.352	21.1607	82.8857	-0.00356267		2.93737	23.5672	82.495	0.331607
1.76416	20.8663	82.1793	0.301606		2.354	22.0148	82.1053	0.00624863		2.354	22.2449	82.6969	0.373281		2.354	21.2658	82.9429	-0.0160683		2.94036	23.7575	82.4977	0.347741
1.76517	20.7968	82.1681	0.285535		2.356	22.0032	81.982	-0.000728774		2.356	22.2106	82.6519	0.370705		2.356	21.2531	82.9246	-0.00552708		2.94425	23.815	82.6083	0.339704
1.76717	20.878	82.1356	0.291898		2.358	22.0496	82.2531	-0.0142542		2.358	22.3511	82.8457	0.369192		2.358	21.4218	82.9468	-0.0173886		2.94536	23.8865	82.5552	0.355066
1.77	21.0473	82.3053	0.303561		2.36	22.2178	82.0181	-0.0212638		2.36	22.3002	82.7008	0.392689		2.36	21.5031	82.9135	-0.0158429		2.94736	24.0258	82.5458	0.350513
1.77016	21.1034	82.2655	0.291052		2.362	22.1973	82.1736	-0.0100892		2.362	22.5049	82.7246	0.363749		2.362	21.4688	82.8729	-0.0208559		2.95036	24.174	82.6055	0.360185
1.77117	21.2102	82.113	0.292939		2.364	22.3163	82.1548	-0.0069977		2.364	22.6365	82.6958	0.378348		2.364	21.5319	82.9424	-0.00925193		2.95425	24.1542	82.539	0.360203
1.77317	21.2539	82.2115	0.296448		2.366	22.4568	82.0587	-0.0064073		2.366	22.724	82.7646	0.381848		2.366	21.7045	82.7574	-0.0160146		2.95536	24.2811	82.5549	0.348504
1.776	21.33	82.3847	0.29507		2.368	22.5657	82.1336	-0.00334798		2.368	22.8246	82.6469	0.386442		2.368	21.8333	82.9463	-0.00682594		2.95735	24.4043	82.5206	0.348698
1.77615	21.4598	82.1556	0.316037		2.37	22.7417	82.2708	-0.000277931		2.37	22.6343	82.6985	0.386807		2.37	21.882	82.8374	-0.006096		2.96035	24.5182	82.6015	0.349275
1.77716	21.3462	82.0431	0.314579		2.372	22.6681	82.1198	-0.0124508		2.372	23.0442	82.8779	0.382889		2.372	22.0441	82.8979	-0.0532095		2.96425	24.6489	82.4717	0.364059
1.78119	21.4381	82.2986	0.295397		2.374	22.8069	82.1881	-0.041949		2.374	22.8882	82.7357	0.394997		2.374	22.0895	82.8191	0.00210512		2.96535	24.7067	82.4754	0.32898
1.782	21.7426	82.3153	0.300105		2.376	22.7289	82.1137	0.0012571		2.376	23.0586	82.8468	0.377758		2.376	22.0275	82.7713	-0.00161973		2.96734	24.7447	82.4909	0.354097
1.77792	21.6293	82.0043	0.29795		2.378	22.7621	82.2492	0.00275993		2.378	23.167	82.7296	0.383254		2.378	22.3566	83.0396	-0.0139966		2.97034	24.8475	82.6424	0.342528
1.79552	21.8089	82.7444	0.290833		2.38	23.1117	82.1703	-0.0204372		2.38	23.2605	82.778	0.389287		2.38	22.36	82.7952	-0.00171634		2.97424	24.908	82.3437	0.327816
1.77353	21.7115	81.7299	0.290633		2.382	23.0464	82.2086	-0.00655759		2.382	23.2871	82.7863	0.382781		2.382	22.3838	83.0174	-0.0126977		2.97747	25.0071	82.5514	0.343826
1.788	21.8931	82.3292	0.292258		2.384	23.1704	82.0937	-0.00971351		2.384	23.2777	82.7307	0.386646		2.384	22.7936	82.9063	-0.0146406		2.97604	25.1856	82.5538	0.34384
1.81358	22.1907	83.413	0.290213		2.386	23.2732	82.187	-0.0139		2.386	23.1477	82.5813	0.397445		2.386	22.6509	82.753	-0.0279728		2.98649	25.3277	82.6948	0.343159
1.74185	21.3936	80.1293	0.280531		2.388	23.3601	82.1531	-7.39701e-05		2.388	23.4635	82.7752	0.385916		2.388	22.927	82.9835	-0.0082429		2.97632	25.3728	82.4006	0.362486
1.8391	22.7712	84.4922	0.296862		2.39	23.5039	82.1559	-0.0112271		2.39	23.7075	82.7008	0.373324		2.39	22.8799	82.9113	-0.0154564		2.99957	25.6126	82.935	0.359
1.794	22.2704	82.2642	0.293503		2.392	23.5587	82.1786	-0.00627848		2.392	23.7351	82.7502	0.376191		2.392	22.9939	82.8474	-0.0110553		2.96797	25.276	81.9823	0.322597
1.69433	20.9629	77.7015	0.288089		2.394	23.6018	82.0848	-0.00280052		2.394	23.8646	82.7169	0.379851		2.394	23.1847	82.889	-0.00326211		3.0238	25.938	83.4814	0.344089
2.03553	25.3371	93.335	0.335334		2.396	23.7717	82.1692	-0.0171847		2.396	23.9664	82.7357	0.388417		2.396	23.2384	82.9751	-0.0172384		2.9422	25.2708	81.178	0.330204
1.40382	17.5844	64.3206	0.221366		2.398	23.8674	82.1881	0.0134192		2.398	24.0217	82.8018	0.372959		2.398	23.4315	82.8746	-0.01697		3.09479	26.7331	85.2879	0.362191
